# Supplementary material for: Genome-Wide Expression Profiling Deciphers Host Responses Altered during Dengue Shock Syndrome and Reveals the Role of Innate Immunity in Severe Dengue
Source: PLoS One. 2010 Jul 20;5(7):e11671. doi: 10.1371/journal.pone.0011671 (PMC2907396; doi:10.1371/journal.pone.0011671)
Supplement: Table S2 — List of the 3515 clones corresponding to the 2959 genes differentially expressed between DF, DHF and DSS patients, identified using the multi-way ANOVA at a false discovery rate of 10. Clones corresponding to the 2959 genes are listed according to their association to DSS, the first one being the gene of which expression level variance is the most influenced by the clinical phenotype. HUGO gene names are indicated. The variation is the one related to the DSS group relatively to DF and DHF. ANOVA, analysis of variance; DF, dengue fever; DHF, dengue hemorrhagic fever; DSS, dengue shock syndrome; NA, not available. a percentage of variance associated to disease phenotype. (0.90 MB XLS) [file pone.0011671.s003.xls]

## Sheet: figure
Table S2. List of the 3515 clones corresponding to the 2959 genes differentially expressed between DF, DHF and DSS patients, identified using the multi-way ANOVA at a false discovery rate of 10.
Agilent ProbeID	TargetID	HUGO gene name	gene description	Accession	P-value	Variation	Var. a
A_24_P478940	THC2668815	NA	NA	thc|THC2668815	<0.00001	up	62.666
A_23_P217269	NM_007268	VSIG4	V-set and immunoglobulin domain containing 4	ref|NM_007268|gb|AY358341|ens|ENST00000374737|gb|AK075171	<0.00001	up	60.4612
A_23_P7313	NM_000582	SPP1	secreted phosphoprotein 1	ref|NM_000582|ref|NM_001040058|ref|NM_001040060|gb|AK075463	<0.00001	up	57.5231
A_23_P7313	NM_000582	SPP1	secreted phosphoprotein 1	ref|NM_000582|ref|NM_001040058|ref|NM_001040060|gb|AK075463	<0.00001	up	56.8422
A_23_P7313	NM_000582	SPP1	secreted phosphoprotein 1	ref|NM_000582|ref|NM_001040058|ref|NM_001040060|gb|AK075463	<0.00001	up	52.7187
A_23_P56578	NM_053276	VIT	vitrin	ref|NM_053276|gb|AF063833|gb|AY358338|ens|ENST00000379241	<0.00001	down	51.5846
A_23_P7313	NM_000582	SPP1	secreted phosphoprotein 1	ref|NM_000582|ref|NM_001040058|ref|NM_001040060|gb|AK075463	<0.00001	up	51.0626
A_23_P7313	NM_000582	SPP1	secreted phosphoprotein 1	ref|NM_000582|ref|NM_001040058|ref|NM_001040060|gb|AK075463	<0.00001	up	49.6956
A_23_P313981	NM_005024	SERPINB10	serpin peptidase inhibitor, clade B (ovalbumin), member 10	ref|NM_005024|ens|ENST00000238508|gb|BC096218|gb|BC096219	<0.00001	up	49.4777
A_23_P7313	NM_000582	SPP1	secreted phosphoprotein 1	ref|NM_000582|ref|NM_001040058|ref|NM_001040060|gb|AK075463	<0.00001	up	49.0145
A_23_P380240	NM_001816	CEACAM8	carcinoembryonic antigen-related cell adhesion molecule 8	ref|NM_001816|gb|D90064|gb|M33326|gb|BC026263	<0.00001	up	48.9206
A_23_P24493	NM_002424	MMP8	matrix metallopeptidase 8 (neutrophil collagenase)	ref|NM_002424|ens|ENST00000236826|gb|J05556|thc|THC2476517	<0.00001	up	48.8331
A_23_P7313	NM_000582	SPP1	secreted phosphoprotein 1	ref|NM_000582|ref|NM_001040058|ref|NM_001040060|gb|AK075463	<0.00001	up	48.8034
A_23_P7313	NM_000582	SPP1	secreted phosphoprotein 1	ref|NM_000582|ref|NM_001040058|ref|NM_001040060|gb|AK075463	<0.00001	up	48.574
A_23_P107750	NM_030760	S1PR5	sphingosine-1-phosphate receptor 5	ref|NM_030760|ens|ENST00000333430|gb|AK094880|gb|AK074661	<0.00001	down	48.1992
A_23_P325562	NM_006671	SLC1A7	solute carrier family 1 (glutamate transporter), member 7	ref|NM_006671|ens|ENST00000371494|gb|AK093921|gb|AX748366	<0.00001	down	47.6972
A_23_P126278	NM_003465	CHIT1	chitinase 1 (chitotriosidase)	ref|NM_003465|gb|U62662|ens|ENST00000255427|ens|ENST00000362046	<0.00001	up	47.6586
A_23_P107744	NM_030760	S1PR5	sphingosine-1-phosphate receptor 5	ref|NM_030760|ens|ENST00000333430|gb|AK094880|gb|AK074661	<0.00001	down	47.4136
A_23_P122924	NM_002192	INHBA	inhibin, beta A	ref|NM_002192|gb|BX648811|ens|ENST00000242208|gb|AK222742	<0.00001	up	46.542
A_24_P181254	NM_006418	OLFM4	olfactomedin 4	ref|NM_006418|gb|AY358567|ens|ENST00000219022|ens|ENST00000377937	<0.00001	up	46.5092
A_32_P17484	BX647685	NA	NA	gb|BX647685|thc|THC2610005	<0.00001	up	46.2753
A_23_P33723	NM_004244	CD163	CD163 molecule	ref|NM_004244|ref|NM_203416|gb|Z22970|gb|Z22971	<0.00001	up	46.0333
A_23_P117992	NM_014861	ATP2C2	ATPase, Ca++ transporting, type 2C, member 2	ref|NM_014861|gb|BX648333|gb|CR749829|ens|ENST00000262429	<0.00001	up	46.0178
A_32_P173662	NM_003296	CRISP2	cysteine-rich secretory protein 2	ref|NM_003296|ens|ENST00000354620|ens|ENST00000339139|gb|AY292863	<0.00001	up	45.6101
A_23_P152559	NM_004758	BZRAP1	benzodiazapine receptor (peripheral) associated protein 1	ref|NM_004758|gb|AF039571	<0.00001	down	45.4502
A_23_P218442	NM_002483	CEACAM6	carcinoembryonic antigen-related cell adhesion molecule 6 (non-specific cross reacting antigen)	ref|NM_002483|gb|BC005008|gb|M18728|ens|ENST00000199764	<0.00001	up	45.1441
A_23_P7313	NM_000582	SPP1	secreted phosphoprotein 1	ref|NM_000582|ref|NM_001040058|ref|NM_001040060|gb|AK075463	<0.00001	up	44.0912
A_23_P501010	NM_000494	COL17A1	collagen, type XVII, alpha 1	ref|NM_000494|ens|ENST00000353479|ens|ENST00000369733|gb|AF136185	<0.00001	up	43.9892
A_23_P111321	NM_000045	ARG1	arginase, liver	ref|NM_000045|gb|AY074488|gb|BC005321|ens|ENST00000368087	<0.00001	up	43.7068
A_23_P31816	NM_005217	DEFA3	defensin, alpha 3, neutrophil-specific	ref|NM_005217|ref|NM_001042500|ref|NM_004084|ens|ENST00000327857	<0.00001	up	43.5516
A_23_P145965	NM_003596	TPST1	tyrosylprotein sulfotransferase 1	ref|NM_003596|ens|ENST00000304842|gb|AK095722|gb|AF038009	<0.00001	up	43.1056
A_32_P178966	ENST00000379426	NA	NA	ens|ENST00000379426|thc|THC2634604	<0.00001	up	43.0903
A_23_P421483	BC005008	CEACAM6	carcinoembryonic antigen-related cell adhesion molecule 6 (non-specific cross reacting antigen)	gb|BC005008|gb|CB240801	<0.00001	up	42.9119
A_24_P243749	NM_002612	PDK4	pyruvate dehydrogenase kinase, isozyme 4	ref|NM_002612|ens|ENST00000005178|gb|AK096428|gb|AF334710	<0.00001	up	42.8631
A_23_P206284	NM_201525	GPR56	G protein-coupled receptor 56	ref|NM_201525|ref|NM_201524|ref|NM_005682|gb|AK131550	<0.00001	down	42.5877
A_23_P364324	NM_152701	ABCA13	ATP-binding cassette, sub-family A (ABC1), member 13	ref|NM_152701|gb|AK128516|gb|AY204751|ens|ENST00000319379	<0.00001	up	42.5146
A_24_P636130	THC2612250	NA	NA	thc|THC2612250|thc|THC2755247	0.00003	down	42.3956
A_24_P113131	NM_004758	BZRAP1	benzodiazapine receptor (peripheral) associated protein 1	ref|NM_004758|gb|AB014512|ens|ENST00000343736|ens|ENST00000355701	<0.00001	down	42.2951
A_23_P121533	NM_012445	SPON2	spondin 2, extracellular matrix protein	ref|NM_012445|ens|ENST00000290902|ens|ENST00000382960|gb|AK074770	<0.00001	down	42.2707
A_24_P323084	NM_178519	C17orf55	chromosome 17 open reading frame 55	ref|NM_178519|gb|AK096740|thc|THC2478525	<0.00001	up	42.0747
A_32_P47538	BC037919	NA	NA	gb|BC037919|gb|BM686055|thc|THC2506750	<0.00001	up	42.0086
A_32_P142440	NM_174936	PCSK9	proprotein convertase subtilisin/kexin type 9	ref|NM_174936|ens|ENST00000302118|gb|AK124635|gb|AK075365	0.00001	up	41.9416
A_23_P141555	NM_013351	TBX21	T-box 21	ref|NM_013351|ens|ENST00000177694|gb|BC039739|gb|AF093098	<0.00001	down	41.9242
A_23_P206280	NM_201525	GPR56	G protein-coupled receptor 56	ref|NM_201525|ref|NM_201524|ref|NM_005682|gb|AK131550	<0.00001	down	41.1662
A_23_P166848	NM_002343	LTF	lactotransferrin	ref|NM_002343|ens|ENST00000231751|gb|AK093852|gb|AF332168	<0.00001	up	40.935
A_24_P416961	NM_001670	ARVCF	armadillo repeat gene deletes in velocardiofacial syndrome	ref|NM_001670|gb|AK092664|ens|ENST00000263207|ens|ENST00000344269	<0.00001	down	40.317
A_23_P143720	NM_004810	GRAP2	GRB2-related adaptor protein 2	ref|NM_004810|gb|CR541849|gb|AF236120|gb|CR536524	0.00004	down	40.1668
A_23_P407565	NM_001337	CX3CR1	chemokine (C-X3-C motif) receptor 1	ref|NM_001337|ens|ENST00000358309|gb|U20350|gb|AK225764	0.00001	down	40.1355
A_24_P354412	AK091335	NA	NA	gb|AK091335|thc|THC2626671|gb|CR737642	<0.00001	up	39.9866
A_24_P295633	NM_024841	FLJ14213	protor-2	ref|NM_024841|gb|AK024275|ens|ENST00000389693|ens|ENST00000389694	0.00002	down	39.9293
A_24_P143653	XR_016918	NA	NA	gb|XR_016918	<0.00001	down	39.8046
A_23_P150789	NM_007173	PRSS23	protease, serine, 23	ref|NM_007173|ens|ENST00000280258|gb|AM392532|gb|AM393531	0.00004	down	39.5479
A_23_P421493	NM_020995	HPR	haptoglobin-related protein	ref|NM_020995|gb|X89214|ens|ENST00000228226|thc|THC2557701	<0.00001	up	39.5188
A_23_P2789	NM_006418	OLFM4	olfactomedin 4	ref|NM_006418|gb|AY358567|ens|ENST00000219022|ens|ENST00000377937	<0.00001	up	39.3738
A_23_P161909	NM_006138	MS4A3	membrane-spanning 4-domains, subfamily A, member 3 (hematopoietic cell-specific)	ref|NM_006138|ref|NM_001031809|ref|NM_001031666|ens|ENST00000278865	<0.00001	up	39.0719
A_23_P130961	NM_001972	ELA2	elastase 2, neutrophil	ref|NM_001972|ens|ENST00000263621|gb|BC074816|gb|BC074817	<0.00001	up	38.8176
A_23_P206760	NM_005143	HP	haptoglobin	ref|NM_005143|ref|NM_020995|gb|X89214|gb|BC107587	<0.00001	up	38.7219
A_23_P23834	NM_001017403	LGR6	leucine-rich repeat-containing G protein-coupled receptor 6	ref|NM_001017403|ref|NM_021636|ref|NM_001017404|ens|ENST00000308543	<0.00001	down	38.6907
A_24_P107859	NM_152594	SPRED1	sprouty-related, EVH1 domain containing 1	ref|NM_152594|ens|ENST00000299084|gb|AK091222|gb|AX746859	<0.00001	up	38.6386
A_23_P5392	NM_004881	TP53I3	tumor protein p53 inducible protein 3	ref|NM_004881|ref|NM_147184|ens|ENST00000308886|ens|ENST00000238721	<0.00001	up	38.6034
A_23_P354341	NM_007053	CD160	CD160 molecule	ref|NM_007053|gb|AK128370|ens|ENST00000369288|ens|ENST00000235933	<0.00001	down	38.5988
A_23_P213620	NM_004576	PPP2R2B	protein phosphatase 2 (formerly 2A), regulatory subunit B, beta isoform	ref|NM_004576|ref|NM_181674|ref|NM_181675|ref|NM_181678	0.00004	down	38.4179
A_23_P47282	NM_021978	ST14	suppression of tumorigenicity 14 (colon carcinoma)	ref|NM_021978|ens|ENST00000278742|gb|AF133086|gb|AB030036	0.00002	up	38.363
A_23_P89249	NM_001005862	ERBB2	v-erb-b2 erythroblastic leukemia viral oncogene homolog 2, neuro/glioblastoma derived oncogene homolog (avian)	ref|NM_001005862|ref|NM_004448|ens|ENST00000269571|ens|ENST00000302390	<0.00001	down	38.2309
A_23_P74575	NM_001766	CD1D	CD1d molecule	ref|NM_001766|ens|ENST00000368171|gb|J04142|gb|AK225996	0.00001	up	38.1901
A_32_P195387	BC110326	C8orf83	chromosome 8 open reading frame 83	gb|BC110326|ens|ENST00000378861|gb|AK097956|gb|BC031029	<0.00001	up	38.0898
A_24_P595717	ENST00000379557	NA	NA	ens|ENST00000379557|ens|ENST00000379560	<0.00001	down	38.0747
A_24_P10884	NM_004810	GRAP2	GRB2-related adaptor protein 2	ref|NM_004810|gb|CR541849|gb|AF236120|gb|CR536524	0.00006	down	38.0693
A_32_P117313	BC110326	C8orf83	chromosome 8 open reading frame 83	gb|BC110326|gb|AF130048|thc|THC2465079|thc|THC2746669	<0.00001	up	37.8063
A_23_P434809	NM_002964	S100A8	S100 calcium binding protein A8	ref|NM_002964|ens|ENST00000368733|ens|ENST00000368732|gb|CQ968034	<0.00001	up	37.7662
A_23_P51231	NM_004350	RUNX3	runt-related transcription factor 3	ref|NM_004350|ref|NM_001031680|ens|ENST00000308873|gb|Z35278	<0.00001	down	37.6426
A_23_P30315	NM_033342	TRIM7	tripartite motif-containing 7	ref|NM_033342|ens|ENST00000334421|gb|AF220032|gb|BC080553	<0.00001	up	37.5686
A_23_P321307	NM_021599	ADAMTS2	ADAM metallopeptidase with thrombospondin type 1 motif, 2	ref|NM_021599|ens|ENST00000274609|thc|THC2535176	0.00008	up	37.4405
A_23_P57323	NM_004449	ERG	v-ets erythroblastosis virus E26 oncogene homolog (avian)	ref|NM_004449|ref|NM_182918|ens|ENST00000357391|ens|ENST00000288319	<0.00001	up	37.4007
A_23_P86838	NM_152313	SLC36A4	solute carrier family 36 (proton/amino acid symporter), member 4	ref|NM_152313|gb|AY162216|ens|ENST00000326402|gb|AJ295983	<0.00001	up	36.8282
A_23_P252062	NM_138711	PPARG	peroxisome proliferator-activated receptor gamma	ref|NM_138711|ref|NM_138712|ref|NM_015869|ref|NM_005037	0.00002	up	36.683
A_24_P54808	NM_020803	KLHL8	kelch-like 8 (Drosophila)	ref|NM_020803|gb|CR749265|ens|ENST00000273963|gb|AB037799	0.00001	up	36.5915
A_23_P218928	NM_016613	C4orf18	chromosome 4 open reading frame 18	ref|NM_016613|gb|BC017701|gb|AK095474|gb|AL832589	0.00001	up	36.5344
A_23_P119322	NM_052884	SIGLEC11	sialic acid binding Ig-like lectin 11	ref|NM_052884|ens|ENST00000293386|ens|ENST00000357375|gb|AF337818	0.00011	up	36.4843
A_23_P140384	NM_001911	CTSG	cathepsin G	ref|NM_001911|ens|ENST00000216336|gb|M16117|gb|BC014460	<0.00001	up	36.4576
A_23_P117582	NM_130469	JDP2	Jun dimerization protein 2	ref|NM_130469|ens|ENST00000267569|gb|BC051303|gb|AB077880	<0.00001	up	36.3469
A_24_P911612	THC2505123	NA	NA	thc|THC2505123|thc|THC2547197	0.00004	down	36.2989
A_24_P119745	NM_212482	FN1	fibronectin 1	ref|NM_212482|ref|NM_212475|ref|NM_002026|ref|NM_212478	<0.00001	up	36.2366
A_23_P8640	NM_001505	GPER	G protein-coupled estrogen receptor 1	ref|NM_001505|ref|NM_001039966|gb|BC011634|ens|ENST00000297469	0.00003	up	36.2121
A_23_P388670	NM_000895	LTA4H	leukotriene A4 hydrolase	ref|NM_000895|gb|BC032528|ens|ENST00000228740|gb|CR457068	0.00002	up	36.1744
A_23_P79134	NM_024310	PLEKHF1	pleckstrin homology domain containing, family F (with FYVE domain) member 1	ref|NM_024310|ens|ENST00000299373|gb|AY037145|gb|AK027758	0.00003	down	36.0676
A_23_P74088	NM_006983	MMP23B	matrix metallopeptidase 23B	ref|NM_006983|ref|NR_002946|gb|AB010962|ens|ENST00000356026	<0.00001	down	36.0537
A_23_P252062	NM_138711	PPARG	peroxisome proliferator-activated receptor gamma	ref|NM_138711|ref|NM_138712|ref|NM_015869|ref|NM_005037	0.00001	up	35.9531
A_23_P252062	NM_138711	PPARG	peroxisome proliferator-activated receptor gamma	ref|NM_138711|ref|NM_138712|ref|NM_015869|ref|NM_005037	0.00001	up	35.934
A_24_P119745	NM_212482	FN1	fibronectin 1	ref|NM_212482|ref|NM_212475|ref|NM_002026|ref|NM_212478	<0.00001	up	35.8513
A_23_P252062	NM_138711	PPARG	peroxisome proliferator-activated receptor gamma	ref|NM_138711|ref|NM_138712|ref|NM_015869|ref|NM_005037	0.00003	up	35.8336
A_24_P119745	NM_212482	FN1	fibronectin 1	ref|NM_212482|ref|NM_212475|ref|NM_002026|ref|NM_212478	0.00016	up	35.7672
A_32_P52785	NM_015345	DAAM2	dishevelled associated activator of morphogenesis 2	ref|NM_015345|gb|AB002379|ens|ENST00000274867|gb|BC047555	0.00007	up	35.709
A_24_P119745	NM_212482	FN1	fibronectin 1	ref|NM_212482|ref|NM_212475|ref|NM_002026|ref|NM_212478	0.00002	up	35.7006
A_23_P121064	NM_002852	PTX3	pentraxin-related gene, rapidly induced by IL-1 beta	ref|NM_002852|ens|ENST00000295927|gb|M31166|gb|X63613	<0.00001	up	35.6827
A_23_P128919	NM_002306	LGALS3	lectin, galactoside-binding, soluble, 3	ref|NM_002306|ref|NR_003225|gb|BC053667|ens|ENST00000254301	0.00001	up	35.6447
A_23_P326080	NM_001925	DEFA4	defensin, alpha 4, corticostatin	ref|NM_001925|ens|ENST00000297435|ens|ENST00000382697|gb|X65977	<0.00001	up	35.5826
A_24_P746314	THC2633920	NA	NA	thc|THC2633920	<0.00001	up	35.5657
A_23_P89249	NM_001005862	ERBB2	v-erb-b2 erythroblastic leukemia viral oncogene homolog 2, neuro/glioblastoma derived oncogene homolog (avian)	ref|NM_001005862|ref|NM_004448|ens|ENST00000269571|ens|ENST00000302390	<0.00001	down	35.5396
A_23_P41114	NM_005213	CSTA	cystatin A (stefin A)	ref|NM_005213|ens|ENST00000264474|gb|CR456914|gb|X05978	0.00001	up	35.5144
A_23_P131785	NM_001725	BPI	bactericidal/permeability-increasing protein	ref|NM_001725|gb|BC032230|ens|ENST00000262865|ens|ENST00000373376	0.00002	up	35.4107
A_23_P200780	NM_003243	TGFBR3	transforming growth factor, beta receptor III	ref|NM_003243|gb|L07594|ens|ENST00000212355|gb|BC126116	0.00002	down	35.3307
A_23_P79130	NM_024310	PLEKHF1	pleckstrin homology domain containing, family F (with FYVE domain) member 1	ref|NM_024310|ens|ENST00000299373|gb|AY037145|gb|AK027758	0.00004	down	35.2806
A_24_P940166	NM_001015880	PAPSS2	3'-phosphoadenosine 5'-phosphosulfate synthase 2	ref|NM_001015880|ref|NM_004670|ens|ENST00000371981|ens|ENST00000361175	<0.00001	up	35.2463
A_32_P223985	THC2643086	NA	NA	thc|THC2643086	<0.00001	up	35.2366
A_23_P113245	D14041	RBPJ	recombination signal binding protein for immunoglobulin kappa J region	gb|D14041	0.00001	up	35.1807
A_23_P205531	NM_194430	NA	NA	ref|NM_194430|ref|NM_002937|ref|NM_194431|ens|ENST00000304704	<0.00001	up	35.1374
A_24_P119745	NM_212482	FN1	fibronectin 1	ref|NM_212482|ref|NM_212475|ref|NM_002026|ref|NM_212478	0.00003	up	35.1017
A_23_P202881	NM_005103	FEZ1	fasciculation and elongation protein zeta 1 (zygin I)	ref|NM_005103|ens|ENST00000278919|gb|CR541954|gb|CR456817	0.00001	down	35.0705
A_23_P7313	NM_000582	SPP1	secreted phosphoprotein 1	ref|NM_000582|ref|NM_001040058|ref|NM_001040060|gb|AK075463	0.00001	up	35.024
A_23_P57709	NM_013363	PCOLCE2	procollagen C-endopeptidase enhancer 2	ref|NM_013363|ens|ENST00000295992|gb|AK075478|gb|AY358557	<0.00001	up	35.0235
A_23_P416711	NM_152996	ST6GALNAC3	ST6 (alpha-N-acetyl-neuraminyl-2,3-beta-galactosyl-1,3)-N-acetylgalactosaminide alpha-2,6-sialyltransferase 3	ref|NM_152996|gb|AK091215|gb|AX746855|gb|BC059363	<0.00001	up	34.9869
A_23_P209700	NM_006056	NMUR1	neuromedin U receptor 1	ref|NM_006056|ens|ENST00000305141|gb|BC051914|gb|BC036543	0.00005	down	34.9815
A_24_P207727	NM_001003891	MED15	mediator complex subunit 15	ref|NM_001003891|ref|NM_015889|gb|AK124276|ens|ENST00000263205	0.00007	down	34.9727
A_24_P203000	NM_000878	IL2RB	interleukin 2 receptor, beta	ref|NM_000878|ens|ENST00000216223|gb|A07795|gb|A07801	0.00014	down	34.9042
A_23_P51136	NM_004040	RHOB	ras homolog gene family, member B	ref|NM_004040|ens|ENST00000272233|ens|ENST00000381107|gb|AF498971	<0.00001	up	34.8938
A_23_P50678	NM_139354	MATK	megakaryocyte-associated tyrosine kinase	ref|NM_139354|ref|NM_139355|ref|NM_002378|ens|ENST00000310132	0.00006	down	34.8259
A_23_P375419	NM_144965	TTC16	tetratricopeptide repeat domain 16	ref|NM_144965|ens|ENST00000373289|ens|ENST00000373288|ens|ENST00000316259	0.00013	down	34.7877
A_24_P191067	NM_001009566	CLSTN1	calsyntenin 1	ref|NM_001009566|ref|NM_014944|ens|ENST00000361311|ens|ENST00000377298	0.00003	down	34.7594
A_23_P318380	NM_173574	ZNF683	zinc finger protein 683	ref|NM_173574|gb|BC029505	0.0001	down	34.739
A_23_P129738	NM_004524	LLGL2	lethal giant larvae homolog 2 (Drosophila)	ref|NM_004524|ref|NM_001031803|ens|ENST00000167462|ens|ENST00000375227	0.00012	down	34.6875
A_24_P139604	NM_198930	PYHIN1	pyrin and HIN domain family, member 1	ref|NM_198930|ref|NM_198929|ref|NM_152501|ref|NM_198928	0.00005	down	34.6436
A_32_P5417	CA946373	NA	NA	gb|CA946373|gb|BX487369|gb|AA676226|gb|AA605002	<0.00001	up	34.612
A_23_P167674	NM_000505	F12	coagulation factor XII (Hageman factor)	ref|NM_000505|gb|BC012390|ens|ENST00000253496|gb|M11723	0.0002	up	34.4944
A_23_P253791	NM_004345	CAMP	cathelicidin antimicrobial peptide	ref|NM_004345|ens|ENST00000296435|gb|AY251531|gb|U19970	<0.00001	up	34.4845
A_32_P83256	AK023663	IRAK3	interleukin-1 receptor-associated kinase 3	gb|AK023663	0.00001	up	34.4661
A_24_P765795	AK055981	NA	NA	gb|AK055981|gb|BC008577|gb|AL109699|gb|AL109698	0.0001	down	34.4588
A_23_P206806	NM_002209	ITGAL	integrin, alpha L (antigen CD11A (p180), lymphocyte function-associated antigen 1; alpha polypeptide)	ref|NM_002209|gb|BC008777|ens|ENST00000356798|ens|ENST00000358164	<0.00001	down	34.4203
A_23_P89249	NM_001005862	ERBB2	v-erb-b2 erythroblastic leukemia viral oncogene homolog 2, neuro/glioblastoma derived oncogene homolog (avian)	ref|NM_001005862|ref|NM_004448|ens|ENST00000269571|ens|ENST00000302390	<0.00001	down	34.3612
A_23_P1461	NM_001008211	OPTN	optineurin	ref|NM_001008211|ref|NM_001008213|ref|NM_001008212|ref|NM_021980	0.00012	down	34.3564
A_23_P254193	NM_017931	TTC38	tetratricopeptide repeat domain 38	ref|NM_017931|gb|BC018918|ens|ENST00000381031|ens|ENST00000334030	0.00001	down	34.3482
A_23_P144959	NM_004385	VCAN	versican	ref|NM_004385|gb|U16306|gb|X15998|ens|ENST00000265077	<0.00001	up	34.2257
A_23_P404016	NM_153209	KIF19	kinesin family member 19	ref|NM_153209|gb|BC026362|ens|ENST00000307521|ens|ENST00000359939	0.00028	down	34.1969
A_23_P252062	NM_138711	PPARG	peroxisome proliferator-activated receptor gamma	ref|NM_138711|ref|NM_138712|ref|NM_015869|ref|NM_005037	0.00004	up	34.195
A_23_P40174	NM_004994	MMP9	matrix metallopeptidase 9 (gelatinase B, 92kDa gelatinase, 92kDa type IV collagenase)	ref|NM_004994|ens|ENST00000372330|gb|J05070|gb|BC006093	0.00001	up	34.1777
A_23_P89249	NM_001005862	ERBB2	v-erb-b2 erythroblastic leukemia viral oncogene homolog 2, neuro/glioblastoma derived oncogene homolog (avian)	ref|NM_001005862|ref|NM_004448|ens|ENST00000269571|ens|ENST00000302390	<0.00001	down	34.0507
A_23_P40174	NM_004994	MMP9	matrix metallopeptidase 9 (gelatinase B, 92kDa gelatinase, 92kDa type IV collagenase)	ref|NM_004994|ens|ENST00000372330|gb|J05070|gb|BC006093	0.00001	up	34.0503
A_23_P40174	NM_004994	MMP9	matrix metallopeptidase 9 (gelatinase B, 92kDa gelatinase, 92kDa type IV collagenase)	ref|NM_004994|ens|ENST00000372330|gb|J05070|gb|BC006093	0.00001	up	34.0286
A_23_P89249	NM_001005862	ERBB2	v-erb-b2 erythroblastic leukemia viral oncogene homolog 2, neuro/glioblastoma derived oncogene homolog (avian)	ref|NM_001005862|ref|NM_004448|ens|ENST00000269571|ens|ENST00000302390	<0.00001	down	33.9799
A_23_P395438	NM_053044	HTRA3	HtrA serine peptidase 3	ref|NM_053044|ens|ENST00000307358|ens|ENST00000382513|gb|AY040094	<0.00001	up	33.9539
A_24_P372223	NM_138715	MSR1	macrophage scavenger receptor 1	ref|NM_138715|ref|NM_138716|ens|ENST00000262101|ens|ENST00000382001	<0.00001	up	33.8958
A_32_P84237	NM_001002912	C1orf173	chromosome 1 open reading frame 173	ref|NM_001002912|gb|CR749349|ens|ENST00000326665|ens|ENST00000342217	0.00004	down	33.8694
A_24_P357468	ENST00000390434	NA	NA	ens|ENST00000390434|ens|ENST00000390438|gb|D13077|gb|U39103	0.00013	down	33.8462
A_23_P48596	NM_198232	RNASE1	ribonuclease, RNase A family, 1 (pancreatic)	ref|NM_198232|ref|NM_198235|ref|NM_198234|ref|NM_002933	0.00002	up	33.799
A_23_P369815	NM_000639	FASLG	Fas ligand (TNF superfamily, member 6)	ref|NM_000639|ens|ENST00000367721|ens|ENST00000340030|gb|D38122	0.00005	down	33.7607
A_23_P119042	NM_005601	NKG7	natural killer cell group 7 sequence	ref|NM_005601|ens|ENST00000221978|gb|E05942|gb|E05939	0.0001	down	33.7449
A_23_P89249	NM_001005862	ERBB2	v-erb-b2 erythroblastic leukemia viral oncogene homolog 2, neuro/glioblastoma derived oncogene homolog (avian)	ref|NM_001005862|ref|NM_004448|ens|ENST00000269571|ens|ENST00000302390	<0.00001	down	33.6864
A_23_P121064	NM_002852	PTX3	pentraxin-related gene, rapidly induced by IL-1 beta	ref|NM_002852|ens|ENST00000295927|gb|M31166|gb|X63613	<0.00001	up	33.6202
A_23_P417632	ENST00000258817	NA	NA	ens|ENST00000258817|gb|XR_016287|ref|XM_001130629|thc|NP103298	<0.00001	up	33.6128
A_23_P40174	NM_004994	MMP9	matrix metallopeptidase 9 (gelatinase B, 92kDa gelatinase, 92kDa type IV collagenase)	ref|NM_004994|ens|ENST00000372330|gb|J05070|gb|BC006093	0.00001	up	33.5607
A_23_P89249	NM_001005862	ERBB2	v-erb-b2 erythroblastic leukemia viral oncogene homolog 2, neuro/glioblastoma derived oncogene homolog (avian)	ref|NM_001005862|ref|NM_004448|ens|ENST00000269571|ens|ENST00000302390	<0.00001	down	33.5561
A_24_P277934	NM_000089	COL1A2	collagen, type I, alpha 2	ref|NM_000089|ens|ENST00000297268|gb|X55525|gb|AK226074	0.00012	up	33.5449
A_23_P121064	NM_002852	PTX3	pentraxin-related gene, rapidly induced by IL-1 beta	ref|NM_002852|ens|ENST00000295927|gb|M31166|gb|X63613	0.00001	up	33.4407
A_23_P169437	NM_005564	LCN2	lipocalin 2	ref|NM_005564|ens|ENST00000373017|ens|ENST00000277480|ens|ENST00000372998	0.00001	up	33.336
A_23_P415006	NM_015470	RAB11FIP5	RAB11 family interacting protein 5 (class I)	ref|NM_015470|ens|ENST00000258098|ens|ENST00000258099|gb|AB020664	0.00034	down	33.3333
A_23_P365834	BC020822	PYHIN1	pyrin and HIN domain family, member 1	gb|BC020822|ens|ENST00000368135|gb|AK024890	0.00011	down	33.3116
A_23_P121064	NM_002852	PTX3	pentraxin-related gene, rapidly induced by IL-1 beta	ref|NM_002852|ens|ENST00000295927|gb|M31166|gb|X63613	0.00001	up	33.2662
A_23_P32955	U08023	MERTK	c-mer proto-oncogene tyrosine kinase	gb|U08023	<0.00001	up	33.2342
A_24_P403959	NM_198232	RNASE1	ribonuclease, RNase A family, 1 (pancreatic)	ref|NM_198232|ref|NM_198235|ref|NM_198234|ref|NM_002933	<0.00001	up	33.2073
A_23_P369815	NM_000639	FASLG	Fas ligand (TNF superfamily, member 6)	ref|NM_000639|ens|ENST00000367721|ens|ENST00000340030|gb|D38122	0.00009	down	33.1522
A_23_P252062	NM_138711	PPARG	peroxisome proliferator-activated receptor gamma	ref|NM_138711|ref|NM_138712|ref|NM_015869|ref|NM_005037	0.00013	up	33.0968
A_23_P59543	NM_001003799	TARP	TCR gamma alternate reading frame protein	ref|NM_001003799|ref|NM_001003806|gb|BC072396|ens|ENST00000390335	0.0002	down	33.0921
A_24_P935986	NM_005504	BCAT1	branched chain aminotransferase 1, cytosolic	ref|NM_005504|gb|AK025615|gb|AF277179|gb|BC026006	0.00028	up	33.0921
A_23_P40174	NM_004994	MMP9	matrix metallopeptidase 9 (gelatinase B, 92kDa gelatinase, 92kDa type IV collagenase)	ref|NM_004994|ens|ENST00000372330|gb|J05070|gb|BC006093	0.00001	up	33.0324
A_23_P1833	NM_018644	B3GAT1	beta-1,3-glucuronyltransferase 1 (glucuronosyltransferase P)	ref|NM_018644|ref|NM_054025|ens|ENST00000312527|gb|AB029396	0.00003	down	33.0322
A_23_P369815	NM_000639	FASLG	Fas ligand (TNF superfamily, member 6)	ref|NM_000639|ens|ENST00000367721|ens|ENST00000340030|gb|D38122	0.00007	down	33.0292
A_23_P60627	NM_001141	ALOX15B	arachidonate 15-lipoxygenase, type B	ref|NM_001141|ref|NM_001039130|ref|NM_001039131|ens|ENST00000320786	0.00011	up	32.9383
A_23_P400435	NM_019095	CRLS1	cardiolipin synthase 1	ref|NM_019095|gb|BC069010|ens|ENST00000378868|gb|AF241784	0.0001	up	32.9362
A_23_P369815	NM_000639	FASLG	Fas ligand (TNF superfamily, member 6)	ref|NM_000639|ens|ENST00000367721|ens|ENST00000340030|gb|D38122	0.00008	down	32.902
A_23_P40174	NM_004994	MMP9	matrix metallopeptidase 9 (gelatinase B, 92kDa gelatinase, 92kDa type IV collagenase)	ref|NM_004994|ens|ENST00000372330|gb|J05070|gb|BC006093	0.00001	up	32.8295
A_23_P133799	NM_201523	KLC4	kinesin light chain 4	ref|NM_201523|ref|NM_201522|ref|NM_201521|ens|ENST00000259708	0.00045	down	32.8221
A_23_P369815	NM_000639	FASLG	Fas ligand (TNF superfamily, member 6)	ref|NM_000639|ens|ENST00000367721|ens|ENST00000340030|gb|D38122	0.00008	down	32.8005
A_24_P396167	NM_001335	CTSW	cathepsin W	ref|NM_001335|ens|ENST00000307886|gb|AF013611|gb|BC035637	0.00004	down	32.7649
A_23_P40174	NM_004994	MMP9	matrix metallopeptidase 9 (gelatinase B, 92kDa gelatinase, 92kDa type IV collagenase)	ref|NM_004994|ens|ENST00000372330|gb|J05070|gb|BC006093	0.00001	up	32.7012
A_23_P74001	NM_005621	S100A12	S100 calcium binding protein A12	ref|NM_005621|ens|ENST00000368737|gb|D83664|gb|X97859	<0.00001	up	32.6956
A_23_P121064	NM_002852	PTX3	pentraxin-related gene, rapidly induced by IL-1 beta	ref|NM_002852|ens|ENST00000295927|gb|M31166|gb|X63613	0.00004	up	32.6492
A_32_P83000	AK055784	LOC388387	hypothetical LOC388387	gb|AK055784|thc|THC2482238	0.00005	up	32.6425
A_23_P40174	NM_004994	MMP9	matrix metallopeptidase 9 (gelatinase B, 92kDa gelatinase, 92kDa type IV collagenase)	ref|NM_004994|ens|ENST00000372330|gb|J05070|gb|BC006093	0.00001	up	32.5731
A_24_P156388	NM_017931	TTC38	tetratricopeptide repeat domain 38	ref|NM_017931|gb|BC018918|ens|ENST00000381031|ens|ENST00000334030	<0.00001	down	32.5333
A_23_P40174	NM_004994	MMP9	matrix metallopeptidase 9 (gelatinase B, 92kDa gelatinase, 92kDa type IV collagenase)	ref|NM_004994|ens|ENST00000372330|gb|J05070|gb|BC006093	0.00001	up	32.5133
A_23_P252062	NM_138711	PPARG	peroxisome proliferator-activated receptor gamma	ref|NM_138711|ref|NM_138712|ref|NM_015869|ref|NM_005037	0.00017	up	32.5105
A_24_P124624	NM_002543	OLR1	oxidized low density lipoprotein (lectin-like) receptor 1	ref|NM_002543|ens|ENST00000309539|gb|AF035776|gb|AB010710	<0.00001	up	32.487
A_23_P75769	NM_024021	MS4A4A	membrane-spanning 4-domains, subfamily A, member 4	ref|NM_024021|ref|NM_148975|ens|ENST00000337908|ens|ENST00000355131	<0.00001	up	32.4569
A_23_P130836	NM_005317	GZMM	granzyme M (lymphocyte met-ase 1)	ref|NM_005317|ens|ENST00000264553|gb|L23134|gb|BC025701	<0.00001	down	32.4128
A_23_P369815	NM_000639	FASLG	Fas ligand (TNF superfamily, member 6)	ref|NM_000639|ens|ENST00000367721|ens|ENST00000340030|gb|D38122	0.00009	down	32.4125
A_23_P116512	NM_024841	FLJ14213	protor-2	ref|NM_024841|gb|AK024275|gb|BX640959|thc|THC2490143	0.00031	down	32.4032
A_23_P119835	NM_021209	NLRC4	NLR family, CARD domain containing 4	ref|NM_021209|ens|ENST00000360906|ens|ENST00000342905|gb|AY035391	0.00001	up	32.4031
A_23_P369815	NM_000639	FASLG	Fas ligand (TNF superfamily, member 6)	ref|NM_000639|ens|ENST00000367721|ens|ENST00000340030|gb|D38122	0.00009	down	32.4015
A_23_P369815	NM_000639	FASLG	Fas ligand (TNF superfamily, member 6)	ref|NM_000639|ens|ENST00000367721|ens|ENST00000340030|gb|D38122	0.0001	down	32.3854
A_32_P333341	BC021055	NA	NA	gb|BC021055|gb|BC017171|gb|BC012195	0.00047	down	32.3613
A_23_P89249	NM_001005862	ERBB2	v-erb-b2 erythroblastic leukemia viral oncogene homolog 2, neuro/glioblastoma derived oncogene homolog (avian)	ref|NM_001005862|ref|NM_004448|ens|ENST00000269571|ens|ENST00000302390	<0.00001	down	32.3394
A_23_P369815	NM_000639	FASLG	Fas ligand (TNF superfamily, member 6)	ref|NM_000639|ens|ENST00000367721|ens|ENST00000340030|gb|D38122	0.0001	down	32.3353
A_23_P13031	NM_001335	CTSW	cathepsin W	ref|NM_001335|ens|ENST00000307886|gb|AF013611|gb|BC035637	0.00006	down	32.3137
A_23_P46369	NM_002870	RAB13	RAB13, member RAS oncogene family	ref|NM_002870|ens|ENST00000368575|ens|ENST00000379592|gb|AF498948	<0.00001	up	32.2691
A_23_P119464	NM_033103	RHPN2	rhophilin, Rho GTPase binding protein 2	ref|NM_033103|ens|ENST00000254260|gb|AF268032|gb|AK126506	0.00058	up	32.2351
A_23_P89249	NM_001005862	ERBB2	v-erb-b2 erythroblastic leukemia viral oncogene homolog 2, neuro/glioblastoma derived oncogene homolog (avian)	ref|NM_001005862|ref|NM_004448|ens|ENST00000269571|ens|ENST00000302390	<0.00001	down	32.2302
A_23_P40174	NM_004994	MMP9	matrix metallopeptidase 9 (gelatinase B, 92kDa gelatinase, 92kDa type IV collagenase)	ref|NM_004994|ens|ENST00000372330|gb|J05070|gb|BC006093	0.00001	up	32.2178
A_23_P121064	NM_002852	PTX3	pentraxin-related gene, rapidly induced by IL-1 beta	ref|NM_002852|ens|ENST00000295927|gb|M31166|gb|X63613	0.00001	up	32.1954
A_23_P66881	NM_003835	RGS9	regulator of G-protein signaling 9	ref|NM_003835|ref|NM_001081955|gb|AF071476|gb|BC022504	0.00048	down	32.1711
A_23_P303149	NM_000141	FGFR2	fibroblast growth factor receptor 2	ref|NM_000141|ref|NM_022970|ens|ENST00000369060|ens|ENST00000358487	0.00019	down	32.1227
A_23_P131789	NM_001725	BPI	bactericidal/permeability-increasing protein	ref|NM_001725|gb|BC032230|ens|ENST00000262865|ens|ENST00000373376	0.00002	up	32.1216
A_23_P54878	NM_002209	ITGAL	integrin, alpha L (antigen CD11A (p180), lymphocyte function-associated antigen 1; alpha polypeptide)	ref|NM_002209|gb|BC008777|ens|ENST00000356798|ens|ENST00000358164	<0.00001	down	32.1143
A_23_P76015	NM_014786	ARHGEF17	Rho guanine nucleotide exchange factor (GEF) 17	ref|NM_014786|ens|ENST00000263674|gb|AB002335|gb|AF378754	0.00004	up	32.0983
A_23_P56898	NM_003937	KYNU	kynureninase (L-kynurenine hydrolase)	ref|NM_003937|ens|ENST00000264170|gb|CR457423|gb|U57721	<0.00001	up	32.097
A_23_P100676	NM_017575	SMG6	Smg-6 homolog, nonsense mediated mRNA decay factor (C. elegans)	ref|NM_017575|ens|ENST00000263073|ens|ENST00000354901|gb|AB018275	0.00012	down	32.0624
A_23_P76488	NM_001423	EMP1	epithelial membrane protein 1	ref|NM_001423|ens|ENST00000256951|gb|Z50751|gb|U77085	0.00013	up	32.0355
A_23_P132027	NM_003116	SPAG4	sperm associated antigen 4	ref|NM_003116|ens|ENST00000374273|gb|AF262992|gb|BC111378	0.00003	up	31.9962
A_23_P75056	NM_001002295	GATA3	GATA binding protein 3	ref|NM_001002295|ref|NM_002051|gb|BC006793|ens|ENST00000379328	0.00003	down	31.9678
A_23_P369815	NM_000639	FASLG	Fas ligand (TNF superfamily, member 6)	ref|NM_000639|ens|ENST00000367721|ens|ENST00000340030|gb|D38122	0.0001	down	31.9202
A_23_P209625	NM_000104	CYP1B1	cytochrome P450, family 1, subfamily B, polypeptide 1	ref|NM_000104|ens|ENST00000260630|ens|ENST00000378989|gb|U03688	<0.00001	up	31.8574
A_23_P252306	NM_002165	ID1	inhibitor of DNA binding 1, dominant negative helix-loop-helix protein	ref|NM_002165|ref|NM_181353|ens|ENST00000341580|ens|ENST00000376105	0.00016	up	31.8536
A_24_P886966	AK123483	NA	NA	gb|AK123483|thc|THC2606387|gb|BM716807|gb|BM049542	0.00056	up	31.8394
A_23_P39682	NM_001079	ZAP70	zeta-chain (TCR) associated protein kinase 70kDa	ref|NM_001079|ref|NM_207519|gb|BC039039|ens|ENST00000264972	0.00023	down	31.8098
A_23_P107587	NM_000271	NPC1	Niemann-Pick disease, type C1	ref|NM_000271|ens|ENST00000269228|gb|AB209048|gb|AF002020	0.00005	down	31.8091
A_24_P188377	NM_000574	CD55	CD55 molecule, decay accelerating factor for complement (Cromer blood group)	ref|NM_000574|gb|AX772832|gb|AF052110|ens|ENST00000367063	0.00024	up	31.791
A_24_P419211	NM_004685	MTMR6	myotubularin related protein 6	ref|NM_004685|ens|ENST00000319298|gb|AK094082|gb|AF072928	0.00019	up	31.7585
A_23_P121064	NM_002852	PTX3	pentraxin-related gene, rapidly induced by IL-1 beta	ref|NM_002852|ens|ENST00000295927|gb|M31166|gb|X63613	0.00008	up	31.7236
A_24_P173754	NM_030806	C1orf21	chromosome 1 open reading frame 21	ref|NM_030806|ens|ENST00000235307|ens|ENST00000367514|gb|AY258286	<0.00001	down	31.7212
A_23_P141100	NM_012091	ADAT1	adenosine deaminase, tRNA-specific 1	ref|NM_012091|ens|ENST00000307921|gb|AK001687|thc|THC2481544	0.00005	down	31.694
A_23_P255126	NM_080612	GAB3	GRB2-associated binding protein 3	ref|NM_080612|ref|NM_001081573|ens|ENST00000369575|gb|AY057989	0.00057	down	31.6869
A_32_P100830	THC2686967	NA	NA	thc|THC2686967	0.00033	down	31.6102
A_23_P157926	NM_152570	LINGO2	leucine rich repeat and Ig domain containing 2	ref|NM_152570|gb|AK056372|ens|ENST00000308675|ens|ENST00000379992	0.0002	down	31.5921
A_23_P308519	NM_004252	SLC9A3R1	solute carrier family 9 (sodium/hydrogen exchanger), member 3 regulator 1	ref|NM_004252|gb|AF015926|gb|BC003361|gb|BC011777	0.00013	down	31.5858
A_23_P110167	NM_002413	MGST2	microsomal glutathione S-transferase 2	ref|NM_002413|ens|ENST00000265498|gb|AK130948|gb|BC025416	0.00003	up	31.5552
A_24_P298179	A_24_P298179	NA	NA		<0.00001	up	31.5149
A_23_P91168	NM_144710	SEPT10	septin 10	ref|NM_144710|ref|NM_178584|gb|BC020502|ens|ENST00000352314	0.00002	up	31.4748
A_23_P8812	W60781	FABP4	fatty acid binding protein 4, adipocyte	gb|W60781|gb|CD103155|gb|CB999999|gb|CD104347	<0.00001	up	31.4556
A_23_P121064	NM_002852	PTX3	pentraxin-related gene, rapidly induced by IL-1 beta	ref|NM_002852|ens|ENST00000295927|gb|M31166|gb|X63613	0.00001	up	31.4164
A_23_P121064	NM_002852	PTX3	pentraxin-related gene, rapidly induced by IL-1 beta	ref|NM_002852|ens|ENST00000295927|gb|M31166|gb|X63613	0.00002	up	31.37
A_23_P150768	NM_007256	SLCO2B1	solute carrier organic anion transporter family, member 2B1	ref|NM_007256|gb|BC041095|ens|ENST00000289575|ens|ENST00000341411	0.0001	up	31.2968
A_23_P345093	NM_152313	SLC36A4	solute carrier family 36 (proton/amino acid symporter), member 4	ref|NM_152313|gb|AY162216|ens|ENST00000326402|gb|AK096251	<0.00001	up	31.1037
A_23_P23815	NM_021194	SLC30A1	solute carrier family 30 (zinc transporter), member 1	ref|NM_021194|gb|BC121015|gb|BC121016	0.00009	up	31.1037
A_23_P203376	NM_152852	MS4A6A	membrane-spanning 4-domains, subfamily A, member 6A	ref|NM_152852|ref|NM_152851|gb|BC022854|thc|THC2461050	<0.00001	up	31.0865
A_23_P75283	NM_006744	RBP4	retinol binding protein 4, plasma	ref|NM_006744|ens|ENST00000371467|ens|ENST00000371464|ens|ENST00000371469	<0.00001	up	31.0513
A_23_P115137	NM_006402	HBXIP	hepatitis B virus x interacting protein	ref|NM_006402|gb|BC062619|ens|ENST00000256644|ens|ENST00000369775	<0.00001	up	31.0433
A_24_P311917	NM_006994	BTN3A3	butyrophilin, subfamily 3, member A3	ref|NM_006994|ref|NM_197974|ens|ENST00000244519|ens|ENST00000339789	0.00004	down	31.0379
A_23_P500333	NM_145716	SSBP3	single stranded DNA binding protein 3	ref|NM_145716|ref|NM_001009955|ref|NM_018070|gb|BC066365	<0.00001	down	31.0219
A_23_P170233	NM_005213	CSTA	cystatin A (stefin A)	ref|NM_005213|ens|ENST00000264474|gb|X05978|gb|BC010379	<0.00001	up	30.9711
A_23_P94533	NM_001912	CTSL1	cathepsin L1	ref|NM_001912|ref|NM_145918|gb|BC012612|ens|ENST00000340342	<0.00001	up	30.9496
A_23_P39454	NM_024967	ZNF556	zinc finger protein 556	ref|NM_024967|gb|BC009374|ens|ENST00000307635|gb|AX721124	0.00008	down	30.8894
A_24_P364221	NM_014207	CD5	CD5 molecule	ref|NM_014207|gb|BC027901|thc|THC2463150	0.00018	down	30.8748
A_32_P98683	NM_005937	MLLT6	myeloid/lymphoid or mixed-lineage leukemia (trithorax homolog, Drosophila); translocated to, 6	ref|NM_005937|gb|AL832481|gb|AK092893|gb|AK057058	0.00011	down	30.8048
A_23_P251881	NM_147130	NCR3	natural cytotoxicity triggering receptor 3	ref|NM_147130|gb|AF031136|ens|ENST00000340027|ens|ENST00000383287	0.00069	down	30.7732
A_23_P86222	NM_138794	LYPLAL1	lysophospholipase-like 1	ref|NM_138794|gb|BC016711|gb|AY341430|gb|CR593519	0.00043	up	30.7692
A_23_P79398	NM_004633	IL1R2	interleukin 1 receptor, type II	ref|NM_004633|ref|NM_173343|ens|ENST00000332549|gb|AK130412	0.00036	up	30.7624
A_23_P204208	NM_002262	KLRD1	killer cell lectin-like receptor subfamily D, member 1	ref|NM_002262|ref|NM_007334|gb|AJ000001|gb|AF498040	0.00001	down	30.6863
A_23_P26037	NM_032892	FRMD5	FERM domain containing 5	ref|NM_032892|gb|AK090572|gb|BC053647|gb|BC020191	0.00041	up	30.6498
A_24_P119745	NM_212482	FN1	fibronectin 1	ref|NM_212482|ref|NM_212475|ref|NM_002026|ref|NM_212478	0.00016	up	30.5306
A_23_P103361	NM_005356	LCK	lymphocyte-specific protein tyrosine kinase	ref|NM_005356|ref|NM_001042771|gb|BC013200|ens|ENST00000336890	0.00012	down	30.51
A_23_P309619	AK123704	LOC100131004	hypothetical protein LOC100131004	gb|AK123704|ens|ENST00000358431|gb|AB051458|gb|AK057551	0.00038	down	30.4804
A_23_P310421	NM_018641	CHST12	carbohydrate (chondroitin 4) sulfotransferase 12	ref|NM_018641|gb|BC002918|gb|BC015954|gb|AF239822	0.00022	down	30.4762
A_23_P122876	NM_005641	TAF6	TAF6 RNA polymerase II, TATA box binding protein (TBP)-associated factor, 80kDa	ref|NM_005641|ref|NM_139123|ref|NM_139122|ref|NM_139315	<0.00001	down	30.4734
A_23_P32903	NM_000276	OCRL	oculocerebrorenal syndrome of Lowe	ref|NM_000276|ref|NM_001587|ens|ENST00000371113|ens|ENST00000371112	<0.00001	up	30.4523
A_24_P205427	AY129023	NA	NA	gb|AY129023|gb|AK097318|gb|AF289551|thc|THC2476219	0.00004	down	30.4462
A_23_P165879	NM_016131	RAB10	RAB10, member RAS oncogene family	ref|NM_016131|ens|ENST00000264710|ens|ENST00000380687|gb|AL136650	0.00005	up	30.445
A_23_P208167	NM_002030	FPR3	formyl peptide receptor 3	ref|NM_002030|ens|ENST00000339223|gb|BC069070|gb|BC069593	0.00001	up	30.428
A_23_P21640	NM_001005273	CHD3	chromodomain helicase DNA binding protein 3	ref|NM_001005273|ref|NM_001005271|ref|NM_005852|ens|ENST00000330494	0.00036	down	30.406
A_23_P64372	NM_001062	TCN1	transcobalamin I (vitamin B12 binding protein, R binder family)	ref|NM_001062|ens|ENST00000257264|gb|DQ892807|gb|DQ896054	0.00002	up	30.3574
A_23_P252062	NM_138711	PPARG	peroxisome proliferator-activated receptor gamma	ref|NM_138711|ref|NM_138712|ref|NM_015869|ref|NM_005037	0.0001	up	30.3491
A_23_P39682	NM_001079	ZAP70	zeta-chain (TCR) associated protein kinase 70kDa	ref|NM_001079|ref|NM_207519|gb|BC039039|ens|ENST00000264972	0.00046	down	30.2557
A_24_P119745	NM_212482	FN1	fibronectin 1	ref|NM_212482|ref|NM_212475|ref|NM_002026|ref|NM_212478	<0.00001	up	30.2363
A_32_P148118	ENST00000331696	NA	NA	ens|ENST00000331696|ens|ENST00000377217|thc|THC2557512	0.00014	up	30.2304
A_23_P93524	NM_001017373	SAMD3	sterile alpha motif domain containing 3	ref|NM_001017373|ens|ENST00000296977|gb|BC141506|gb|AK091351	0.00058	down	30.227
A_23_P428738	NM_001145	ANG	angiogenin, ribonuclease, RNase A family, 5	ref|NM_001145|ens|ENST00000336811|gb|BC062698|gb|BC054880	0.00004	up	30.2158
A_23_P121064	NM_002852	PTX3	pentraxin-related gene, rapidly induced by IL-1 beta	ref|NM_002852|ens|ENST00000295927|gb|M31166|gb|X63613	0.00004	up	30.1668
A_23_P7262	AK000675	2009-03-01	membrane-associated ring finger (C3HC4) 1	gb|AK000675|thc|THC2472540|thc|THC2647972	0.00001	up	30.1401
A_24_P918242	A_24_P918242	NA	NA		0.00026	up	30.1384
A_24_P38081	NM_004117	FKBP5	FK506 binding protein 5	ref|NM_004117|ens|ENST00000357266|ens|ENST00000337746|ens|ENST00000373877	0.00076	up	30.0505
A_24_P45476	NM_002995	XCL1	chemokine (C motif) ligand 1	ref|NM_002995|ref|NM_003175|ens|ENST00000367818|ens|ENST00000367819	0.00027	down	29.9957
A_24_P97374	NM_005442	EOMES	eomesodermin homolog (Xenopus laevis)	ref|NM_005442|gb|BC025363|gb|BC037568|thc|THC2631102	0.00013	down	29.9556
A_23_P82523	NM_000927	ABCB1	ATP-binding cassette, sub-family B (MDR/TAP), member 1	ref|NM_000927|gb|AF016535|ens|ENST00000265724|gb|AM393352	0.00003	down	29.9505
A_23_P421401	NM_002609	PDGFRB	platelet-derived growth factor receptor, beta polypeptide	ref|NM_002609|ens|ENST00000261799|gb|J03278|gb|M21616	<0.00001	down	29.8824
A_23_P112602	NM_018207	TRIM62	tripartite motif-containing 62	ref|NM_018207|gb|AX775829|ens|ENST00000355900|ens|ENST00000373431	0.00007	down	29.8535
A_23_P104493	NM_001015880	PAPSS2	3'-phosphoadenosine 5'-phosphosulfate synthase 2	ref|NM_001015880|ref|NM_004670|gb|BC009894|ens|ENST00000371981	<0.00001	up	29.8147
A_32_P174874	DQ287932	DPY19L1	dpy-19-like 1 (C. elegans)	gb|DQ287932|ens|ENST00000310974|ens|ENST00000389292|gb|AK026768	<0.00001	up	29.7888
A_24_P350576	AB011123	TNIK	TRAF2 and NCK interacting kinase	gb|AB011123|ens|ENST00000284483|ens|ENST00000356366|ens|ENST00000357327	0.00043	down	29.7373
A_23_P60977	NM_014387	LAT	linker for activation of T cells	ref|NM_014387|ens|ENST00000354453|ens|ENST00000360872|gb|AF036906	0.00007	down	29.7194
A_23_P330561	NM_174918	C19orf59	chromosome 19 open reading frame 59	ref|NM_174918|ens|ENST00000333598|gb|AF461155|gb|BC035847	0.00027	up	29.7185
A_23_P97573	NM_004698	PRPF3	PRP3 pre-mRNA processing factor 3 homolog (S. cerevisiae)	ref|NM_004698|gb|AF001947|ens|ENST00000324862|gb|DQ892853	<0.00001	down	29.7125
A_23_P208747	NM_005091	PGLYRP1	peptidoglycan recognition protein 1	ref|NM_005091|ens|ENST00000008938|gb|BC096154|gb|BC096155	<0.00001	up	29.6633
A_24_P209428	BC027954	TRGV7	T cell receptor gamma variable 7 pseudogene	gb|BC027954|ens|ENST00000354395|thc|THC2480213	0.00048	down	29.6425
A_23_P36745	NM_000690	ALDH2	aldehyde dehydrogenase 2 family (mitochondrial)	ref|NM_000690|ens|ENST00000261733|gb|X05409|gb|Y00109	0.00024	up	29.6221
A_23_P101392	NM_024074	TMEM38A	transmembrane protein 38A	ref|NM_024074|ens|ENST00000187762|gb|AK025981|gb|BC001195	<0.00001	up	29.6188
A_23_P334218	NM_145647	WDR67	WD repeat domain 67	ref|NM_145647|gb|AK094612|ens|ENST00000287380|ens|ENST00000309336	0.00033	down	29.594
A_23_P252062	NM_138711	PPARG	peroxisome proliferator-activated receptor gamma	ref|NM_138711|ref|NM_138712|ref|NM_015869|ref|NM_005037	0.00036	up	29.5034
A_24_P96709	BC062579	CDC2L1	cell division cycle 2-like 1 (PITSLRE proteins)	gb|BC062579|gb|BC073855|ref|XM_001128005|thc|THC2493903	0.00002	down	29.4686
A_24_P734953	NM_001013642	TRNP1	TMF1-regulated nuclear protein 1	ref|NM_001013642|ens|ENST00000374108|gb|BC069216|thc|THC2736936	0.00037	up	29.4448
A_23_P103765	NM_002001	FCER1A	Fc fragment of IgE, high affinity I, receptor for; alpha polypeptide	ref|NM_002001|ens|ENST00000317818|ens|ENST00000368114|ens|ENST00000368115	0.001	down	29.4197
A_24_P205008	AK094466	TSEN54	tRNA splicing endonuclease 54 homolog (S. cerevisiae)	gb|AK094466|thc|THC2481865	0.00016	down	29.4009
A_24_P63019	NM_004633	IL1R2	interleukin 1 receptor, type II	ref|NM_004633|ref|NM_173343|gb|U64094|ens|ENST00000332549	0.00118	up	29.3622
A_23_P341312	NM_198969	AES	amino-terminal enhancer of split	ref|NM_198969|ref|NM_001130|ref|NM_198970|gb|AF072902	0.00001	down	29.3578
A_23_P64898	NM_005810	KLRG1	killer cell lectin-like receptor subfamily G, member 1	ref|NM_005810|gb|BC012621|ens|ENST00000356986|ens|ENST00000266551	0.00161	down	29.3112
A_23_P311875	NM_006725	CD6	CD6 molecule	ref|NM_006725|gb|X60992|gb|AK126159|gb|BC033755	0.00053	down	29.2359
A_23_P148473	NM_000206	IL2RG	interleukin 2 receptor, gamma (severe combined immunodeficiency)	ref|NM_000206|ens|ENST00000276110|ens|ENST00000374188|ens|ENST00000374202	0.00039	down	29.2174
A_23_P421032	NM_174977	SEC14L4	SEC14-like 4 (S. cerevisiae)	ref|NM_174977|gb|AK093448|gb|AK093418|gb|AX748114	0.00128	down	29.2048
A_24_P169234	NM_001079	ZAP70	zeta-chain (TCR) associated protein kinase 70kDa	ref|NM_001079|ref|NM_207519|gb|BC039039|ens|ENST00000389517	0.00052	down	29.1976
A_24_P12397	NM_018965	TREM2	triggering receptor expressed on myeloid cells 2	ref|NM_018965|gb|AB062787|gb|BC032362|ens|ENST00000373118	0.00004	up	29.1931
A_23_P134419	NM_007155	ZP3	zona pellucida glycoprotein 3 (sperm receptor)	ref|NM_007155|gb|M60504|ens|ENST00000336517|ens|ENST00000257652	0.00092	up	29.0648
A_24_P272146	BC067092	IGKC	immunoglobulin kappa constant	gb|BC067092|ens|ENST00000390276|ens|ENST00000390251|gb|AY942035	0.00017	up	29.0218
A_32_P136871	THC2712372	NA	NA	thc|THC2712372	0.00123	down	29.0091
A_23_P145657	NM_012447	STAG3	stromal antigen 3	ref|NM_012447|ens|ENST00000317296|ens|ENST00000339784|gb|AJ007798	<0.00001	up	29.0034
A_23_P145024	NM_000024	ADRB2	adrenergic, beta-2-, receptor, surface	ref|NM_000024|gb|M15169|ens|ENST00000305988|gb|AK223025	0.00043	down	28.9977
A_23_P163025	NM_002935	RNASE3	ribonuclease, RNase A family, 3 (eosinophil cationic protein)	ref|NM_002935|ens|ENST00000304639|gb|BC096060|gb|BC096061	<0.00001	up	28.9852
A_23_P106069	ENST00000390428	NA	NA	ens|ENST00000390428|gb|X58747|gb|D13069|gb|L02827	0.00026	down	28.9322
A_23_P89249	NM_001005862	ERBB2	v-erb-b2 erythroblastic leukemia viral oncogene homolog 2, neuro/glioblastoma derived oncogene homolog (avian)	ref|NM_001005862|ref|NM_004448|ens|ENST00000269571|ens|ENST00000302390	0.00004	down	28.8786
A_24_P862524	A_24_P862524	NA	NA		0.00016	up	28.8474
A_23_P104318	NM_019058	DDIT4	DNA-damage-inducible transcript 4	ref|NM_019058|ens|ENST00000307365|gb|AY090097|gb|BC015236	0.00153	up	28.8028
A_23_P376449	XR_016155	LOC642413	similar to Cathepsin L1	gb|XR_016155|gb|XR_016426|gb|XR_016762|thc|THC2532340	0.00003	up	28.7996
A_23_P394545	NM_015275	KIAA1033	KIAA1033	ref|NM_015275|gb|AK001657|ens|ENST00000311317|ens|ENST00000332180	0.00024	up	28.7975
A_23_P346900	NM_001005505	CACNA2D2	calcium channel, voltage-dependent, alpha 2/delta subunit 2	ref|NM_001005505|ref|NM_006030|gb|AF040709|ens|ENST00000266039	0.00029	down	28.7797
A_23_P128993	NM_033423	GZMH	granzyme H (cathepsin G-like 2, protein h-CCPX)	ref|NM_033423|gb|AY232657|gb|AY232658|ens|ENST00000216338	0.00042	down	28.7102
A_32_P148122	BC095489	IGKC	immunoglobulin kappa constant	gb|BC095489|gb|BC070336|gb|BC073791|gb|Y14736	0.00004	up	28.6526
A_23_P9485	NM_000608	ORM2	orosomucoid 2	ref|NM_000608|ens|ENST00000374100|gb|CR456930|gb|BC015964	0.00006	up	28.6519
A_23_P160406	NM_016121	KCTD3	potassium channel tetramerisation domain containing 3	ref|NM_016121|gb|BC094879|ens|ENST00000259154|gb|AF155110	0.0002	up	28.6481
A_23_P32233	NM_004235	KLF4	Kruppel-like factor 4 (gut)	ref|NM_004235|gb|BC030811|gb|BC029923|ens|ENST00000374672	0.00019	up	28.6334
A_23_P138262	NM_012387	PADI4	peptidyl arginine deiminase, type IV	ref|NM_012387|ens|ENST00000375448|gb|AB017919|gb|BC025718	0.00128	up	28.6273
A_23_P219117	NM_001978	EPB49	erythrocyte membrane protein band 4.9 (dematin)	ref|NM_001978|gb|BC017445|gb|BC052805|ens|ENST00000265800	0.00034	down	28.6124
A_23_P13232	A_23_P13232	NA	NA		0.00001	down	28.5268
A_23_P104798	NM_001562	IL18	interleukin 18 (interferon-gamma-inducing factor)	ref|NM_001562|gb|AY266351|ens|ENST00000280357|gb|CR542001	0.00004	up	28.4624
A_24_P652033	AK026768	DPY19L1P1	dpy-19-like 1 pseudogene 1 (C. elegans)	gb|AK026768|thc|THC2537781|thc|THC2538890	<0.00001	up	28.4441
A_23_P129038	NM_016337	EVL	Enah/Vasp-like	ref|NM_016337|gb|BC023997|ens|ENST00000355449|gb|DQ893343	0.00005	down	28.3962
A_23_P10182	NM_003500	ACOX2	acyl-Coenzyme A oxidase 2, branched chain	ref|NM_003500|ens|ENST00000302819|gb|X95190|gb|BC047700	0.00017	up	28.3945
A_24_P626951	ENST00000390253	NA	NA	ens|ENST00000390253|ens|ENST00000390272|gb|AF078945|gb|AY686921	0.00021	up	28.3882
A_23_P352861	BC028083	TRBV5-4	T cell receptor beta variable 5-4	gb|BC028083|gb|BC036926|gb|BC110303|gb|BC071724	0.00058	down	28.3852
A_23_P43157	NM_001080416	MYBL1	v-myb myeloblastosis viral oncogene homolog (avian)-like 1	ref|NM_001080416|gb|X66087|gb|AA761901|thc|THC2621930	0.00091	down	28.3366
A_23_P24260	ENST00000371207	NA	NA	ens|ENST00000371207|gb|BX369131|thc|THC2503082|thc|THC2528975	0.00066	up	28.3319
A_23_P87709	NM_024829	PLBD1	phospholipase B domain containing 1	ref|NM_024829|gb|BC063561|ens|ENST00000240617|gb|AK225458	0.0002	up	28.3311
A_23_P27840	NM_003169	SUPT5H	suppressor of Ty 5 homolog (S. cerevisiae)	ref|NM_003169|gb|AB209257|ens|ENST00000359191|ens|ENST00000378524	0.00035	down	28.2895
A_24_P755069	A_24_P755069	NA	NA		<0.00001	up	28.289
A_23_P162300	NM_007199	IRAK3	interleukin-1 receptor-associated kinase 3	ref|NM_007199|ens|ENST00000261233|gb|AF113136|gb|BC057800	0.00001	up	28.2746
A_23_P308673	NM_004783	TAOK2	TAO kinase 2	ref|NM_004783|ens|ENST00000279394|gb|AB020688|gb|AK057589	0.00012	down	28.2544
A_23_P108042	BC064806	NCR1	natural cytotoxicity triggering receptor 1	gb|BC064806|gb|AJ001383|thc|NP080923|thc|THC2481710	0.00016	down	28.2277
A_24_P942933	AK022802	APOBEC3G	apolipoprotein B mRNA editing enzyme, catalytic polypeptide-like 3G	gb|AK022802	0.00001	down	28.2116
A_24_P237443	NM_018990	SASH3	SAM and SH3 domain containing 3	ref|NM_018990|ens|ENST00000371094|ens|ENST00000356892|gb|BC051881	0.0001	down	28.2067
A_23_P41528	NM_031950	FGFBP2	fibroblast growth factor binding protein 2	ref|NM_031950|ens|ENST00000382324|ens|ENST00000259989|ens|ENST00000382328	0.00136	down	28.2046
A_23_P120354	NM_023016	ANKRD57	ankyrin repeat domain 57	ref|NM_023016|ens|ENST00000356454|gb|AK023346|gb|AK025523	0.0002	up	28.1924
A_23_P122007	NM_033211	C5orf30	chromosome 5 open reading frame 30	ref|NM_033211|ens|ENST00000319933|gb|AK090558|gb|AX746509	0.00029	up	28.1915
A_23_P17739	NM_003426	ZNF74	zinc finger protein 74	ref|NM_003426|ref|NR_003253|gb|BC013395|ens|ENST00000357502	<0.00001	down	28.1853
A_23_P1962	NM_004585	RARRES3	retinoic acid receptor responder (tazarotene induced) 3	ref|NM_004585|ens|ENST00000255688|ens|ENST00000354445|gb|AB030815	0.00062	down	28.1562
A_24_P307869	NM_001015002	LLGL2	lethal giant larvae homolog 2 (Drosophila)	ref|NM_001015002|gb|BC067840|gb|BC006503|gb|BC010879	0.00003	down	28.1281
A_23_P101303	ENST00000221462	NA	NA	ens|ENST00000221462|gb|BC039061|gb|AB075866|thc|NP435281	0.00004	down	28.0899
A_24_P165423	NM_052960	RBP7	retinol binding protein 7, cellular	ref|NM_052960|ens|ENST00000294435|ens|ENST00000377192|ens|ENST00000315901	0.00002	up	28.0877
A_23_P17345	NM_005461	MAFB	v-maf musculoaponeurotic fibrosarcoma oncogene homolog B (avian)	ref|NM_005461|ens|ENST00000373313|gb|AF134157|gb|BC036689	0.00005	up	28.065
A_24_P212024	ENST00000390258	NA	NA	ens|ENST00000390258|ens|ENST00000259219|gb|AY867113|gb|X72476	0.0002	up	28.0503
A_23_P152087	NM_018145	FAM82A2	family with sequence similarity 82, member A2	ref|NM_018145|gb|AK025963|ens|ENST00000338376|gb|AK123282	0.00045	down	28.0335
A_24_P277934	NM_000089	COL1A2	collagen, type I, alpha 2	ref|NM_000089|ens|ENST00000297268|gb|X55525|gb|AK226074	0.00063	up	28.0273
A_24_P937405	NM_007173	PRSS23	protease, serine, 23	ref|NM_007173|ens|ENST00000280258|gb|AK075362|thc|THC2469793	0.00166	down	28.0017
A_23_P65797	NM_022480	KLHL25	kelch-like 25 (Drosophila)	ref|NM_022480|gb|AK092231|gb|AK126962|gb|AY764034	0.00018	down	27.9938
A_24_P940790	BC009297	C17orf101	chromosome 17 open reading frame 101	gb|BC009297|thc|THC2616878|thc|THC2473974	0.00001	down	27.9588
A_23_P353742	NM_017749	AMBRA1	autophagy/beclin-1 regulator 1	ref|NM_017749|gb|AK023197|gb|AK000301|ens|ENST00000314845	0.00005	down	27.9523
A_24_P693986	NM_001013642	TRNP1	TMF1-regulated nuclear protein 1	ref|NM_001013642|ens|ENST00000374108|gb|BC069216|thc|THC2471812	<0.00001	up	27.9007
A_24_P682199	CR749500	LOC390595	similar to ubiquitin-associated protein 1 (predicted)	gb|CR749500|gb|AK023802|thc|THC2492237|thc|THC2502835	0.00018	down	27.8912
A_24_P922909	AF272377	MLL	myeloid/lymphoid or mixed-lineage leukemia (trithorax homolog, Drosophila)	gb|AF272377|thc|NP288426	0.0004	down	27.888
A_23_P69810	NM_032717	AGPAT9	1-acylglycerol-3-phosphate O-acyltransferase 9	ref|NM_032717|ens|ENST00000264409|gb|AK055749|gb|AY358100	0.00012	up	27.8812
A_24_P915806	NM_001024074	HNMT	histamine N-methyltransferase	ref|NM_001024074|gb|BC005907|thc|THC2480733|thc|THC2536890	0.00001	up	27.8689
A_23_P205567	NM_006255	PRKCH	protein kinase C, eta	ref|NM_006255|gb|AX775931|gb|BC037268|ens|ENST00000332981	0.00009	down	27.8351
A_24_P365975	NM_005202	COL8A2	collagen, type VIII, alpha 2	ref|NM_005202|gb|AK074129|ens|ENST00000303143|thc|THC2492211	0.00028	up	27.8057
A_24_P876734	BC062792	NA	NA	gb|BC062792|gb|BC040942|gb|BC015242|gb|BC046120	0.00035	down	27.7977
A_23_P36753	NM_000690	ALDH2	aldehyde dehydrogenase 2 family (mitochondrial)	ref|NM_000690|ens|ENST00000261733|gb|AK223373|gb|S80262	0.00044	up	27.7877
A_24_P326957	NM_025230	WDR23	WD repeat domain 23	ref|NM_025230|ref|NM_181357|gb|AF130070|ens|ENST00000326009	0.00087	down	27.7778
A_23_P374902	NM_152353	CLDND2	claudin domain containing 2	ref|NM_152353|ens|ENST00000291715|gb|DQ890968|gb|DQ894142	0.00053	down	27.7465
A_23_P23234	BC000988	C1orf217	chromosome 1 open reading frame 217	gb|BC000988	0.00116	down	27.7228
A_23_P208706	NM_138764	BAX	BCL2-associated X protein	ref|NM_138764|ref|NM_138761|ref|NM_138765|ref|NM_138763	<0.00001	down	27.7202
A_32_P39440	BC030813	IGK@	immunoglobulin kappa locus	gb|BC030813|gb|BC073792|ens|ENST00000390252|ens|ENST00000390274	0.00037	up	27.6743
A_24_P722360	THC2706887	NA	NA	thc|THC2706887	0.00027	down	27.6546
A_24_P251866	NM_021599	ADAMTS2	ADAM metallopeptidase with thrombospondin type 1 motif, 2	ref|NM_021599|ens|ENST00000274609|thc|THC2535176	0.00113	up	27.6447
A_24_P940426	NM_206855	QKI	quaking homolog, KH domain RNA binding (mouse)	ref|NM_206855|ref|NM_206854|ref|NM_206853|gb|AB067800	0.00012	up	27.6002
A_24_P21715	NM_004584	RAD9A	RAD9 homolog A (S. pombe)	ref|NM_004584|ens|ENST00000307980|gb|BC014848|gb|U53174	0.00001	down	27.5862
A_23_P397937	NM_152552	SAMD3	sterile alpha motif domain containing 3	ref|NM_152552|ens|ENST00000324172|ens|ENST00000368134|gb|BC119757	0.00096	down	27.5444
A_24_P76911	NM_015528	RNF167	ring finger protein 167	ref|NM_015528|gb|AL834284|gb|BC010139|ens|ENST00000381350	0.00013	down	27.541
A_24_P930049	THC2630983	NA	NA	thc|THC2630983	0.0011	down	27.5394
A_32_P494169	ENST00000376238	NA	NA	ens|ENST00000376238|gb|AK022042|thc|THC2745638	0.00018	up	27.5373
A_23_P145024	NM_000024	ADRB2	adrenergic, beta-2-, receptor, surface	ref|NM_000024|gb|M15169|ens|ENST00000305988|gb|AK223025	0.00068	down	27.5316
A_24_P289208	NM_003226	TFF3	trefoil factor 3 (intestinal)	ref|NM_003226|ens|ENST00000291525|ens|ENST00000380423|gb|AF432265	0.00005	up	27.5146
A_23_P131020	NM_017660	GATAD2A	GATA zinc finger domain containing 2A	ref|NM_017660|gb|AK125974|gb|BC011684|ens|ENST00000360315	0.00002	down	27.51
A_24_P262395	NM_012138	AATF	apoptosis antagonizing transcription factor	ref|NM_012138|ens|ENST00000389309|ens|ENST00000389310|ens|ENST00000225402	<0.00001	down	27.4576
A_23_P4096	NM_000717	CA4	carbonic anhydrase IV	ref|NM_000717|ens|ENST00000300900|gb|CR541766|gb|BC074768	0.00038	up	27.4557
A_24_P74932	NM_002668	PLP2	proteolipid protein 2 (colonic epithelium-enriched)	ref|NM_002668|ens|ENST00000376327|ens|ENST00000376322|gb|BC109066	0.00002	up	27.4533
A_23_P145024	NM_000024	ADRB2	adrenergic, beta-2-, receptor, surface	ref|NM_000024|gb|M15169|ens|ENST00000305988|gb|AK223025	0.00061	down	27.4465
A_24_P181120	NM_002624	PFDN5	prefoldin subunit 5	ref|NM_002624|ref|NM_145897|ens|ENST00000334478|ens|ENST00000351500	0.00019	up	27.4457
A_23_P161458	NM_018324	OLAH	oleoyl-ACP hydrolase	ref|NM_018324|ref|NM_001039702|gb|BC050372|ens|ENST00000378217	0.00057	up	27.44
A_23_P153185	ENST00000299502	NA	NA	ens|ENST00000299502|gb|J03603|gb|BC012609|gb|J02685	0.00037	up	27.4157
A_24_P363711	NM_001926	DEFA6	defensin, alpha 6, Paneth cell-specific	ref|NM_001926|ens|ENST00000297436|ens|ENST00000382702|gb|BC069667	0.001	up	27.3727
A_23_P147277	NM_207346	TSEN54	tRNA splicing endonuclease 54 homolog (S. cerevisiae)	ref|NM_207346|ens|ENST00000333213|ens|ENST00000375235|gb|AK097583	0.0001	down	27.3438
A_23_P145024	NM_000024	ADRB2	adrenergic, beta-2-, receptor, surface	ref|NM_000024|gb|M15169|ens|ENST00000305988|gb|AK223025	0.00073	down	27.3425
A_23_P21260	ENST00000390263	NA	NA	ens|ENST00000390263|gb|AY942106|gb|L03178|gb|S67637	0.00012	up	27.3359
A_23_P114582	THC2532155	NA	NA	thc|THC2532155	0.00001	down	27.3298
A_24_P66578	ENST00000310579	NA	NA	ens|ENST00000310579|ens|ENST00000377221|ens|ENST00000331696|ens|ENST00000377217	0.00035	up	27.303
A_32_P133072	NM_006108	SPON1	spondin 1, extracellular matrix protein	ref|NM_006108|ens|ENST00000310358|gb|AK074803|gb|AB018305	0.00006	down	27.2887
A_23_P18317	NM_017836	SLC41A3	solute carrier family 41, member 3	ref|NM_017836|ref|NM_001008487|ref|NM_001008485|ref|NM_001008486	0.00061	down	27.2627
A_23_P308058	NM_172367	TUSC5	tumor suppressor candidate 5	ref|NM_172367|ens|ENST00000333813|gb|AB090231|gb|AL831929	<0.00001	down	27.2532
A_23_P69179	NM_018192	LEPREL1	leprecan-like 1	ref|NM_018192|gb|BC005029|ens|ENST00000319332|gb|AJ430351	0.00146	down	27.2316
A_24_P186944	XR_018133	RPL9P18	ribosomal protein L9 pseudogene 18	gb|XR_018133|ref|XM_940587|ref|XM_946378|ref|XR_016190	0.00071	up	27.2067
A_23_P211680	NM_015166	MLC1	megalencephalic leukoencephalopathy with subcortical cysts 1	ref|NM_015166|ref|NM_139202|gb|BC028425|ens|ENST00000311597	0.00214	down	27.1803
A_24_P535256	AK001903	NA	NA	gb|AK001903|thc|THC2637030	0.00188	up	27.1711
A_23_P50081	NM_014214	IMPA2	inositol(myo)-1(or 4)-monophosphatase 2	ref|NM_014214|ens|ENST00000269159|gb|AF014398|gb|BC017176	0.00024	up	27.1673
A_32_P227769	AK057962	NA	NA	gb|AK057962|thc|THC2503762	0.00008	up	27.1531
A_24_P147849	A_24_P147849	NA	NA		0.00135	down	27.1186
A_23_P86653	NM_002727	SRGN	serglycin	ref|NM_002727|ens|ENST00000242465|gb|J03223|gb|X17042	0.00007	up	27.1095
A_24_P406830	NM_201278	MTMR2	myotubularin related protein 2	ref|NM_201278|ref|NM_201281|ref|NM_016156|ens|ENST00000346299	0.00149	down	27.0968
A_23_P24215	AJ404330	TBC1D12	TBC1 domain family, member 12	gb|AJ404330|gb|BC064323|gb|XM_051081|ref|XM_937729	0.0001	up	27.0725
A_23_P103661	NM_139118	YY1AP1	YY1 associated protein 1	ref|NM_139118|ref|NM_139119|gb|CR749789|gb|BC008766	0.00016	down	27.0627
A_23_P114172	NM_017752	TBC1D8B	TBC1 domain family, member 8B (with GRAM domain)	ref|NM_017752|gb|AK000305|gb|AK091248|ens|ENST00000276175	0.00001	up	27.0554
A_23_P145024	NM_000024	ADRB2	adrenergic, beta-2-, receptor, surface	ref|NM_000024|gb|M15169|ens|ENST00000305988|gb|AK223025	0.00093	down	27.0479
A_23_P15582	NM_022167	XYLT2	xylosyltransferase II	ref|NM_022167|gb|AY358090|ens|ENST00000017003|ens|ENST00000376550	0.00069	down	27.0396
A_23_P121082	NM_000158	GBE1	glucan (1,4-alpha-), branching enzyme 1	ref|NM_000158|ens|ENST00000264326|gb|AK125918|gb|L07956	<0.00001	up	26.9953
A_24_P119745	NM_212482	FN1	fibronectin 1	ref|NM_212482|ref|NM_212475|ref|NM_002026|ref|NM_212478	0.00103	up	26.9919
A_23_P120883	NM_002133	HMOX1	heme oxygenase (decycling) 1	ref|NM_002133|gb|X06985|gb|M23042|gb|BC001491	0.00042	up	26.9907
A_23_P39682	NM_001079	ZAP70	zeta-chain (TCR) associated protein kinase 70kDa	ref|NM_001079|ref|NM_207519|gb|BC039039|ens|ENST00000264972	0.00125	down	26.9474
A_23_P156390	NM_014790	JAKMIP2	janus kinase and microtubule interacting protein 2	ref|NM_014790|ens|ENST00000265272|gb|BC017354|gb|AF273057	0.00023	down	26.9156
A_23_P132644	NM_020792	AADACL1	arylacetamide deacetylase-like 1	ref|NM_020792|ens|ENST00000273512|gb|AB037784|gb|AL512752	<0.00001	up	26.8927
A_23_P145024	NM_000024	ADRB2	adrenergic, beta-2-, receptor, surface	ref|NM_000024|gb|M15169|ens|ENST00000305988|gb|AK223025	0.00073	down	26.8817
A_23_P120883	NM_002133	HMOX1	heme oxygenase (decycling) 1	ref|NM_002133|gb|X06985|gb|M23042|gb|BC001491	0.00043	up	26.8409
A_23_P120883	NM_002133	HMOX1	heme oxygenase (decycling) 1	ref|NM_002133|gb|X06985|gb|M23042|gb|BC001491	0.00049	up	26.8274
A_24_P46953	NM_013257	SGK3	serum/glucocorticoid regulated kinase family, member 3	ref|NM_013257|ref|NM_170709|ref|NM_001033578|ens|ENST00000262211	0.00038	up	26.8199
A_23_P148768	NM_000130	F5	coagulation factor V (proaccelerin, labile factor)	ref|NM_000130|ens|ENST00000367797|ens|ENST00000362078|ens|ENST00000367796	0.00082	up	26.8137
A_24_P453921	AK026768	DPY19L1P1	dpy-19-like 1 pseudogene 1 (C. elegans)	gb|AK026768|thc|THC2584444|thc|THC2538890	<0.00001	up	26.7811
A_32_P172188	NM_024927	PLEKHH3	pleckstrin homology domain containing, family H (with MyTH4 domain) member 3	ref|NM_024927|gb|BC016062|gb|AK024672|ens|ENST00000293349	0.00021	up	26.7734
A_23_P86751	NM_018702	ADARB2	adenosine deaminase, RNA-specific, B2 (RED2 homolog rat)	ref|NM_018702|gb|AK055107|gb|AF034837|gb|BC047443	0.00009	up	26.7261
A_23_P148768	NM_000130	F5	coagulation factor V (proaccelerin, labile factor)	ref|NM_000130|ens|ENST00000367797|ens|ENST00000362078|ens|ENST00000367796	0.00092	up	26.6959
A_24_P134816	NM_182557	BCL9L	B-cell CLL/lymphoma 9-like	ref|NM_182557|gb|AB094091|ens|ENST00000334801|thc|THC2462628	0.00012	down	26.6955
A_23_P40611	NM_000355	TCN2	transcobalamin II; macrocytic anemia	ref|NM_000355|gb|BC011239|ens|ENST00000215838|gb|CU013479	0.00039	up	26.6929
A_24_P357847	BC030813	IGK@	immunoglobulin kappa locus	gb|BC030813|ens|ENST00000390252|ens|ENST00000390274|ens|ENST00000390281	0.00069	up	26.677
A_23_P120883	NM_002133	HMOX1	heme oxygenase (decycling) 1	ref|NM_002133|gb|X06985|gb|M23042|gb|BC001491	0.00048	up	26.6595
A_23_P111206	NM_004117	FKBP5	FK506 binding protein 5	ref|NM_004117|ens|ENST00000357266|ens|ENST00000337746|ens|ENST00000373877	0.00029	up	26.6476
A_23_P343865	ENST00000295075	NA	NA	ens|ENST00000295075|gb|AK056625|thc|THC2476587	0.00038	down	26.6462
A_23_P87421	BC063022	PRSS23	protease, serine, 23	gb|BC063022|thc|THC2620648	0.00227	down	26.6423
A_23_P146554	NM_000954	PTGDS	prostaglandin D2 synthase 21kDa (brain)	ref|NM_000954|ens|ENST00000371625|ens|ENST00000224167|gb|AK075333	0.00056	down	26.6307
A_23_P152548	NM_021626	SCPEP1	serine carboxypeptidase 1	ref|NM_021626|gb|BC072405|gb|AF113214|gb|BC010078	0.00018	up	26.6169
A_23_P379649	NM_001003940	BMF	Bcl2 modifying factor	ref|NM_001003940|ref|NM_033503|ref|NM_001003942|ref|NM_001003943	0.0005	up	26.5604
A_32_P208350	NM_153046	TDRD9	tudor domain containing 9	ref|NM_153046|gb|AL833915|ens|ENST00000361369|ens|ENST00000286956	0.00001	up	26.5576
A_23_P34676	NM_198053	CD247	CD247 molecule	ref|NM_198053|ref|NM_000734|ens|ENST00000361719|ens|ENST00000362089	0.00006	down	26.5238
A_23_P135190	NM_006266	RALGDS	ral guanine nucleotide dissociation stimulator	ref|NM_006266|ref|NM_001042368|gb|AK074114|gb|AK127524	0.00062	down	26.4865
A_24_P154037	NM_003749	IRS2	insulin receptor substrate 2	ref|NM_003749|ens|ENST00000375856|gb|AF073310|gb|BC042858	0.00065	up	26.4839
A_32_P71171	A_32_P71171	NA	NA		0.00105	down	26.4511
A_24_P490109	A_24_P490109	NA	NA		0.00052	up	26.4347
A_23_P119794	CR608907	NA	NA	gb|CR608907|thc|THC2549935	0.00068	down	26.4308
A_23_P145024	NM_000024	ADRB2	adrenergic, beta-2-, receptor, surface	ref|NM_000024|gb|M15169|ens|ENST00000305988|gb|AK223025	0.00133	down	26.4303
A_23_P148768	NM_000130	F5	coagulation factor V (proaccelerin, labile factor)	ref|NM_000130|ens|ENST00000367797|ens|ENST00000362078|ens|ENST00000367796	0.00099	up	26.2799
A_23_P169529	NM_004504	AGFG1	ArfGAP with FG repeats 1	ref|NM_004504|gb|X89478|ens|ENST00000310078|ens|ENST00000373671	0.00162	up	26.248
A_24_P282210	NM_005632	SOLH	small optic lobes homolog (Drosophila)	ref|NM_005632|ens|ENST00000219611|gb|BC011939|gb|BC040169	0.00054	down	26.2162
A_24_P71153	ENST00000374285	NA	NA	ens|ENST00000374285|gb|AK129536|gb|NM_000437|thc|THC2564459	0.00203	down	26.2102
A_24_P64126	NM_003909	CPNE3	copine III	ref|NM_003909|gb|BC066597|ens|ENST00000198765|gb|AB014536	0.0004	up	26.1851
A_23_P120883	NM_002133	HMOX1	heme oxygenase (decycling) 1	ref|NM_002133|gb|X06985|gb|M23042|gb|BC001491	0.0006	up	26.1832
A_23_P126735	NM_000572	IL10	interleukin 10	ref|NM_000572|ens|ENST00000367099|gb|M57627|gb|BC022315	0.00038	up	26.1754
A_23_P393777	NM_000953	PTGDR	prostaglandin D2 receptor (DP)	ref|NM_000953|ens|ENST00000306051|gb|AK026202|gb|BC040968	0.00123	down	26.1621
A_23_P152818	NM_007067	MYST2	MYST histone acetyltransferase 2	ref|NM_007067|ens|ENST00000259021|gb|AK023890|gb|AK122932	0.00019	down	26.1421
A_32_P129894	NM_001080497	NA	NA	ref|NM_001080497|ens|ENST00000373930|gb|BC016989|gb|AJ420444	0.00131	up	26.1393
A_23_P57110	NM_033409	C20orf54	chromosome 20 open reading frame 54	ref|NM_033409|gb|AK074650|ens|ENST00000217254|ens|ENST00000381944	0.00091	down	26.1311
A_23_P253068	NM_013366	ANAPC2	anaphase promoting complex subunit 2	ref|NM_013366|ens|ENST00000323927|gb|AF191337|gb|DQ890852	0.00041	down	26.1307
A_23_P39682	NM_001079	ZAP70	zeta-chain (TCR) associated protein kinase 70kDa	ref|NM_001079|ref|NM_207519|gb|BC039039|ens|ENST00000264972	0.00159	down	26.129
A_23_P133438	NM_019018	FAM105A	family with sequence similarity 105, member A	ref|NM_019018|ens|ENST00000274217|gb|AK001989|gb|BC011524	0.00014	up	26.1172
A_23_P48936	NM_005902	SMAD3	SMAD family member 3	ref|NM_005902|gb|BC000414|ens|ENST00000327367|gb|BC007496	0.0006	down	26.0767
A_32_P77742	THC2652817	NA	NA	thc|THC2652817	0.00078	down	26.0752
A_24_P941404	A_24_P941404	NA	NA		0.00052	down	26.0744
A_32_P163125	NM_147156	SGMS1	sphingomyelin synthase 1	ref|NM_147156|ens|ENST00000361781|ens|ENST00000361543|gb|Y14155	0.00009	up	26.0597
A_23_P139704	NM_001946	DUSP6	dual specificity phosphatase 6	ref|NM_001946|ref|NM_022652|ens|ENST00000279488|ens|ENST00000308385	<0.00001	up	26.0524
A_23_P416747	NM_000733	CD3E	CD3e molecule, epsilon (CD3-TCR complex)	ref|NM_000733|ens|ENST00000361763|gb|X03884|gb|BC033578	0.00008	down	26.0462
A_32_P48019	AL832767	NA	NA	gb|AL832767|thc|THC2579637|thc|THC2508349	0.00121	down	26.0355
A_23_P100326	NM_001039476	C16orf35	chromosome 16 open reading frame 35	ref|NM_001039476|ref|NM_001077350|ens|ENST00000262313|gb|AK090717	0.00341	down	26.0312
A_23_P4649	NM_001645	APOC1	apolipoprotein C-I	ref|NM_001645|ens|ENST00000252491|gb|BT007142|gb|M27359	0.00011	up	26.0235
A_24_P927432	BC035592	TRGV5	T cell receptor gamma variable 5	gb|BC035592|gb|BC030554|ref|XM_940430|thc|THC2489492	0.00024	down	26.0123
A_23_P167005	NM_014373	GPR160	G protein-coupled receptor 160	ref|NM_014373|ens|ENST00000355897|gb|BC000181|gb|AJ249248	0.00065	up	26.0023
A_23_P161552	NM_032389	ARFGAP2	ADP-ribosylation factor GTPase activating protein 2	ref|NM_032389|ens|ENST00000319543|gb|AK129511|gb|AK027482	0.00007	down	25.9928
A_24_P941339	NM_000219	KCNE1	potassium voltage-gated channel, Isk-related family, member 1	ref|NM_000219|ens|ENST00000337385|gb|BC036452|thc|THC2476554	0.00006	up	25.9872
A_23_P51269	CD641036	BTF3L4	basic transcription factor 3-like 4	gb|CD641036	0.00023	up	25.9724
A_24_P879711	AK023150	CCDC138	coiled-coil domain containing 138	gb|AK023150|thc|THC2605037	<0.00001	down	25.9641
A_23_P44112	NM_014387	LAT	linker for activation of T cells	ref|NM_014387|ref|NM_001014987|ref|NM_001014988|ref|NM_001014989	0.00052	down	25.9627
A_32_P1712	NM_002934	RNASE2	ribonuclease, RNase A family, 2 (liver, eosinophil-derived neurotoxin)	ref|NM_002934|ens|ENST00000304625|ens|ENST00000258817|gb|BC093678	0.00011	up	25.943
A_24_P277934	NM_000089	COL1A2	collagen, type I, alpha 2	ref|NM_000089|ens|ENST00000297268|gb|X55525|gb|AK226074	0.00203	up	25.9365
A_24_P494425	ENST00000390275	NA	NA	ens|ENST00000390275|gb|X72459|gb|DQ841033|gb|DQ101035	0.00046	up	25.9063
A_23_P151059	NM_018088	FAM90A1	family with sequence similarity 90, member A1	ref|NM_018088|ens|ENST00000307435|ens|ENST00000382595|ens|ENST00000382601	0.00299	down	25.8865
A_24_P377394	NM_003449	TRIM26	tripartite motif-containing 26	ref|NM_003449|gb|BC024039|ens|ENST00000327357|ens|ENST00000354738	0.00004	down	25.8864
A_23_P163216	NM_024837	ATP8B4	ATPase, class I, type 8B, member 4	ref|NM_024837|ens|ENST00000284509|gb|AK123747|gb|AK025125	<0.00001	up	25.8827
A_24_P261760	NM_005810	KLRG1	killer cell lectin-like receptor subfamily G, member 1	ref|NM_005810|gb|BC012621|ens|ENST00000356986|ens|ENST00000266551	0.00343	down	25.8749
A_23_P20606	NM_015469	NIPSNAP3A	nipsnap homolog 3A (C. elegans)	ref|NM_015469|ens|ENST00000351220|ens|ENST00000374767|gb|AL117557	0.0004	up	25.8684
A_23_P137765	NM_000437	PAFAH2	platelet-activating factor acetylhydrolase 2, 40kDa	ref|NM_000437|ens|ENST00000374284|ens|ENST00000374282|gb|U89386	0.00196	down	25.8645
A_23_P39682	NM_001079	ZAP70	zeta-chain (TCR) associated protein kinase 70kDa	ref|NM_001079|ref|NM_207519|gb|BC039039|ens|ENST00000264972	0.00174	down	25.8537
A_32_P171793	THC2676635	NA	NA	thc|THC2676635	0.00241	down	25.8448
A_23_P39682	NM_001079	ZAP70	zeta-chain (TCR) associated protein kinase 70kDa	ref|NM_001079|ref|NM_207519|gb|BC039039|ens|ENST00000264972	0.00167	down	25.8427
A_24_P367227	NM_001080416	NA	NA	ref|NM_001080416|ens|ENST00000331406|gb|BC101187|gb|BC101188	0.00125	down	25.832
A_23_P345118	NM_002648	PIM1	pim-1 oncogene	ref|NM_002648|ens|ENST00000373509|ens|ENST00000373507|gb|M54915	0.00169	down	25.8158
A_23_P120883	NM_002133	HMOX1	heme oxygenase (decycling) 1	ref|NM_002133|gb|X06985|gb|M23042|gb|BC001491	0.00073	up	25.8127
A_24_P944848	AF305815	PIGT	phosphatidylinositol glycan anchor biosynthesis, class T	gb|AF305815|thc|THC2480566	0.00069	down	25.7991
A_23_P128192	NM_002624	PFDN5	prefoldin subunit 5	ref|NM_002624|ens|ENST00000334478|ens|ENST00000243040|gb|BT007195	0.00074	up	25.7946
A_32_P184279	NM_005436	CCDC6	coiled-coil domain containing 6	ref|NM_005436|ens|ENST00000263102|gb|AK055515|gb|BC036757	0.00005	up	25.7813
A_24_P943588	AF201385	TXNRD2	thioredoxin reductase 2	gb|AF201385|gb|AK094698|thc|NP303071|thc|THC2504451	0.0017	down	25.7716
A_23_P126103	NM_001902	CTH	cystathionase (cystathionine gamma-lyase)	ref|NM_001902|ref|NM_153742|ens|ENST00000346806|ens|ENST00000370938	0.00106	up	25.7594
A_23_P66682	NM_018952	HOXB6	homeobox B6	ref|NM_018952|gb|AJ270993|ens|ENST00000225648|gb|BC014651	0.00196	up	25.7288
A_24_P64039	NM_006803	AP3M2	adaptor-related protein complex 3, mu 2 subunit	ref|NM_006803|ens|ENST00000174653|gb|D38293|gb|BX648354	0.0008	down	25.7255
A_23_P70583	NM_022553	VPS52	vacuolar protein sorting 52 homolog (S. cerevisiae)	ref|NM_022553|ens|ENST00000374638|ens|ENST00000293739|ens|ENST00000383078	0.00004	down	25.7143
A_23_P37856	NM_000558	HBA1	hemoglobin, alpha 1	ref|NM_000558|ens|ENST00000320868|gb|BC101846|gb|BC101848	0.00372	down	25.7033
A_24_P698128	THC2689155	NA	NA	thc|THC2689155	0.00048	down	25.7021
A_24_P478153	DA572835	NA	NA	gb|DA572835|thc|THC2478531	0.00219	down	25.6927
A_23_P159163	A_23_P159163	NA	NA		0.00055	up	25.6915
A_23_P430792	NM_152781	C17orf66	chromosome 17 open reading frame 66	ref|NM_152781|gb|BC033734|ens|ENST00000311880|gb|BC132681	0.00273	down	25.6913
A_32_P159192	ENST00000390281	NA	NA	ens|ENST00000390281|ens|ENST00000390247|ens|ENST00000295339|gb|X85155	0.00091	up	25.6859
A_23_P99632	NM_017999	RNF31	ring finger protein 31	ref|NM_017999|gb|AY256461|gb|BC012077|ens|ENST00000324103	0.00065	down	25.6858
A_24_P252497	NM_025195	TRIB1	tribbles homolog 1 (Drosophila)	ref|NM_025195|ens|ENST00000311922|gb|AF250310|gb|AF205437	0.00031	up	25.6694
A_24_P410639	BC014384	NA	NA	gb|BC014384|gb|AK056974|thc|THC2538214	0.00004	up	25.6667
A_23_P159039	NM_182706	SCRIB	scribbled homolog (Drosophila)	ref|NM_182706|ref|NM_015356|gb|AF318352|ens|ENST00000356994	0.00024	down	25.66
A_24_P900730	A_24_P900730	NA	NA		0.00004	up	25.6589
A_23_P169494	NM_000607	ORM1	orosomucoid 1	ref|NM_000607|gb|BC026238|ens|ENST00000259396|gb|BT019790	0.00032	up	25.6564
A_32_P319814	THC2646374	NA	NA	thc|THC2646374	0.00006	down	25.6283
A_23_P377957	NM_138444	KCTD12	potassium channel tetramerisation domain containing 12	ref|NM_138444|gb|BC013764|ens|ENST00000317765|ens|ENST00000377474	0.00128	up	25.5896
A_23_P120883	NM_002133	HMOX1	heme oxygenase (decycling) 1	ref|NM_002133|gb|X06985|gb|M23042|gb|BC001491	0.00068	up	25.5883
A_32_P108722	AK127572	NA	NA	gb|AK127572	0.00012	down	25.5846
A_23_P72503	NM_007246	KLHL2	kelch-like 2, Mayven (Drosophila)	ref|NM_007246|ens|ENST00000226725|gb|AF059569|gb|AB209727	0.00008	up	25.5631
A_23_P84202	NM_024515	WDR25	WD repeat domain 25	ref|NM_024515|ens|ENST00000335290|gb|AY295082|thc|THC2464778	0.00003	down	25.5605
A_32_P92814	THC2536682	NA	NA	thc|THC2536682|gb|AA723549|gb|BQ929021|gb|BE169649	0.00052	up	25.5534
A_24_P910050	CD242823	NA	NA	gb|CD242823|thc|THC2559739|thc|THC2533240|thc|THC2524646	0.00113	down	25.5356
A_23_P103361	NM_005356	LCK	lymphocyte-specific protein tyrosine kinase	ref|NM_005356|ref|NM_001042771|gb|BC013200|ens|ENST00000336890	0.00158	down	25.5222
A_23_P145024	NM_000024	ADRB2	adrenergic, beta-2-, receptor, surface	ref|NM_000024|gb|M15169|ens|ENST00000305988|gb|AK223025	0.00127	down	25.5217
A_24_P54220	NM_000639	FASLG	Fas ligand (TNF superfamily, member 6)	ref|NM_000639|gb|AF288573|ens|ENST00000367721|ens|ENST00000340030	0.00056	down	25.5054
A_23_P148768	NM_000130	F5	coagulation factor V (proaccelerin, labile factor)	ref|NM_000130|ens|ENST00000367797|ens|ENST00000362078|ens|ENST00000367796	0.0013	up	25.4987
A_23_P148768	NM_000130	F5	coagulation factor V (proaccelerin, labile factor)	ref|NM_000130|ens|ENST00000367797|ens|ENST00000362078|ens|ENST00000367796	0.00115	up	25.4816
A_23_P141173	NM_000250	MPO	myeloperoxidase	ref|NM_000250|gb|X04876|ens|ENST00000225275|ens|ENST00000340482	0.00024	up	25.4714
A_24_P372625	NM_016422	RNF141	ring finger protein 141	ref|NM_016422|ens|ENST00000265981|gb|BX647862|thc|THC2492115	0.00021	up	25.4318
A_23_P21800	BC032451	IGK@	immunoglobulin kappa locus	gb|BC032451|ens|ENST00000390255|ens|ENST00000390281|ens|ENST00000390270	0.00108	up	25.4184
A_24_P228302	NM_006890	CEACAM7	carcinoembryonic antigen-related cell adhesion molecule 7	ref|NM_006890|ens|ENST00000006724|ens|ENST00000338196|gb|X98311	0.00006	up	25.4124
A_23_P20832	NM_003127	SPTAN1	spectrin, alpha, non-erythrocytic 1 (alpha-fodrin)	ref|NM_003127|gb|BC034956|gb|BC053521|ens|ENST00000372731	0.00003	down	25.4121
A_24_P322709	NM_003098	SNTA1	syntrophin, alpha 1 (dystrophin-associated protein A1, 59kDa, acidic component)	ref|NM_003098|ens|ENST00000217381|gb|DQ893566|gb|DQ896816	0.00106	down	25.4065
A_23_P29237	NM_145641	APOL3	apolipoprotein L, 3	ref|NM_145641|ref|NM_145642|ref|NM_014349|ref|NM_030644	0.00084	down	25.3968
A_24_P333420	AK098076	ATP1A4	ATPase, Na+/K+ transporting, alpha 4 polypeptide	gb|AK098076|ens|ENST00000368080|thc|THC2490840	0.00092	down	25.3968
A_23_P13969	BC052611	PXN	paxillin	gb|BC052611|gb|AK026695|thc|THC2476357	<0.00001	down	25.3861
A_23_P369502	NM_012387	PADI4	peptidyl arginine deiminase, type IV	ref|NM_012387|ens|ENST00000375448|ens|ENST00000358829|ens|ENST00000375453	0.00039	up	25.381
A_24_P835500	AK026647	ITPRIPL2	inositol 1,4,5-triphosphate receptor interacting protein-like 2	gb|AK026647|thc|THC2508446	<0.00001	up	25.3807
A_24_P98021	NM_003980	MAP7	microtubule-associated protein 7	ref|NM_003980|ens|ENST00000354570|gb|AJ420541|gb|BC025777	0.00001	up	25.3788
A_23_P120883	NM_002133	HMOX1	heme oxygenase (decycling) 1	ref|NM_002133|gb|X06985|gb|M23042|gb|BC001491	0.00073	up	25.3702
A_23_P53015	NM_022830	TUT1	terminal uridylyl transferase 1, U6 snRNA-specific	ref|NM_022830|gb|BC110910|ens|ENST00000278279|gb|BC128263	0.00017	down	25.3425
A_24_P278460	NM_032228	FAR1	fatty acyl CoA reductase 1	ref|NM_032228|ens|ENST00000354817|ens|ENST00000358833|gb|AL713674	<0.00001	up	25.3388
A_23_P133095	AB002311	RAPGEF2	Rap guanine nucleotide exchange factor (GEF) 2	gb|AB002311|ens|ENST00000264431|gb|AF070570|gb|BC110355	0.0001	up	25.3314
A_23_P311640	NM_006076	AGFG2	ArfGAP with FG repeats 2	ref|NM_006076|ens|ENST00000300176|ens|ENST00000262935|gb|BC017329	0.0011	down	25.3275
A_24_P187583	NM_031213	FAM108A1	family with sequence similarity 108, member A1	ref|NM_031213|ref|NM_001080422|gb|BC000158|gb|BC035961	0.00128	down	25.3165
A_23_P216361	NM_021110	COL14A1	collagen, type XIV, alpha 1	ref|NM_021110|ens|ENST00000297848|ens|ENST00000247781|gb|Y11711	0.00098	up	25.3114
A_23_P377245	BC042172	NA	NA	gb|BC042172|gb|AF085941|gb|BC021230|ref|XM_932244	0.00058	down	25.2997
A_24_P11825	NM_000647	CCR2	chemokine (C-C motif) receptor 2	ref|NM_000647|ens|ENST00000292301|gb|BC126452|gb|U03882	0.00011	up	25.2774
A_23_P156049	NM_000521	HEXB	hexosaminidase B (beta polypeptide)	ref|NM_000521|gb|BC017378|ens|ENST00000380533|ens|ENST00000261416	0.0006	up	25.2717
A_23_P5075	NM_031213	FAM108A1	family with sequence similarity 108, member A1	ref|NM_031213|ref|NM_001080422|gb|BC000158|gb|BC035961	0.00133	down	25.2665
A_24_P125236	NM_172367	TUSC5	tumor suppressor candidate 5	ref|NM_172367|ens|ENST00000333813|gb|AL831929|gb|AB090231	0.0004	down	25.2655
A_24_P937095	ENST00000367000	NA	NA	ens|ENST00000367000|ens|ENST00000367001|gb|U68494|gb|BX647120	0.00022	up	25.2643
A_23_P148768	NM_000130	F5	coagulation factor V (proaccelerin, labile factor)	ref|NM_000130|ens|ENST00000367797|ens|ENST00000362078|ens|ENST00000367796	0.0014	up	25.2626
A_23_P84106	NM_014271	IL1RAPL1	interleukin 1 receptor accessory protein-like 1	ref|NM_014271|ens|ENST00000378993|gb|AJ243874|thc|THC2477594	0.00223	down	25.2275
A_23_P166677	NM_022736	MFSD1	major facilitator superfamily domain containing 1	ref|NM_022736|gb|AF351617|ens|ENST00000264266|ens|ENST00000361159	<0.00001	up	25.2199
A_24_P91272	NM_004232	SOCS6	suppressor of cytokine signaling 6	ref|NM_004232|ens|ENST00000302056|gb|AF161545|gb|BC020082	0.00002	up	25.2101
A_24_P339560	NM_052884	SIGLEC11	sialic acid binding Ig-like lectin 11	ref|NM_052884|ens|ENST00000293386|ens|ENST00000357375|gb|AB072038	0.00266	up	25.1908
A_24_P81205	BX427054	DEFA1	defensin, alpha 1	gb|BX427054|thc|THC2710598	0.00007	up	25.1845
A_24_P277934	NM_000089	COL1A2	collagen, type I, alpha 2	ref|NM_000089|ens|ENST00000297268|gb|X55525|gb|AK226074	0.00267	up	25.1661
A_23_P305198	NM_003151	STAT4	signal transducer and activator of transcription 4	ref|NM_003151|ens|ENST00000358470|gb|BC016694|gb|DQ891548	0.0004	down	25.1617
A_23_P206400	AB020679	MON1B	MON1 homolog B (yeast)	gb|AB020679|thc|THC2520174	0.0013	down	25.1462
A_24_P142973	ENST00000329627	NA	NA	ens|ENST00000329627|gb|AK000065|gb|AK000702|thc|THC2483894	0.00021	down	25.1445
A_24_P930815	A_24_P930815	NA	NA		0.00317	down	25.1318
A_24_P382187	NM_001552	IGFBP4	insulin-like growth factor binding protein 4	ref|NM_001552|ens|ENST00000269593|gb|M62403|gb|BC016041	0.00056	down	25.1303
A_23_P159952	NM_018476	BEX1	brain expressed, X-linked 1	ref|NM_018476|ens|ENST00000372728|gb|AF237783|gb|BC018615	0.00009	up	25.1263
A_24_P525917	AK025758	NFATC2	nuclear factor of activated T-cells, cytoplasmic, calcineurin-dependent 2	gb|AK025758|gb|AA878288|gb|BE002760	0.00006	down	25.1217
A_23_P254801	NM_002660	PLCG1	phospholipase C, gamma 1	ref|NM_002660|ref|NM_182811|ens|ENST00000244007|ens|ENST00000373271	0.00151	down	25.1074
A_23_P120883	NM_002133	HMOX1	heme oxygenase (decycling) 1	ref|NM_002133|gb|X06985|gb|M23042|gb|BC001491	0.00075	up	25.0828
A_23_P209678	NM_002664	PLEK	pleckstrin	ref|NM_002664|ens|ENST00000234313|gb|X07743|gb|AB208967	0.00026	down	25.0706
A_23_P167941	NM_018965	TREM2	triggering receptor expressed on myeloid cells 2	ref|NM_018965|ens|ENST00000373118|ens|ENST00000373113|gb|AF213457	0.00045	up	25.0672
A_23_P212126	NM_080542	COLQ	collagen-like tail subunit (single strand of homotrimer) of asymmetric acetylcholinesterase	ref|NM_080542|ref|NM_080538|ref|NM_005677|ref|NM_080540	0.00094	down	25.0618
A_23_P103361	NM_005356	LCK	lymphocyte-specific protein tyrosine kinase	ref|NM_005356|ref|NM_001042771|gb|BC013200|ens|ENST00000336890	0.00181	down	25.0465
A_32_P203836	BC035863	GEN1	Gen homolog 1, endonuclease (Drosophila)	gb|BC035863	0.00353	up	25.0457
A_23_P82523	NM_000927	ABCB1	ATP-binding cassette, sub-family B (MDR/TAP), member 1	ref|NM_000927|gb|AF016535|ens|ENST00000265724|gb|AM393352	0.00013	down	25.0287
A_24_P921402	THC2484646	NA	NA	thc|THC2484646	0.0012	down	25.0148
A_32_P82111	NM_020737	LRFN2	leucine rich repeat and fibronectin type III domain containing 2	ref|NM_020737|ens|ENST00000338305|gb|AB033072	0.00018	down	25.0128
A_24_P294832	NM_003463	PTP4A1	protein tyrosine phosphatase type IVA, member 1	ref|NM_003463|ens|ENST00000370651|ens|ENST00000370650|gb|AJ420505	0.00065	up	25
A_23_P113212	NM_018004	TMEM45A	transmembrane protein 45A	ref|NM_018004|ens|ENST00000323523|gb|AB013911|gb|AK000996	0.00091	up	24.989
A_24_P829183	AK056817	FLJ32255	hypothetical protein LOC643977	gb|AK056817|ref|XM_943640|thc|THC2604473	0.00145	down	24.9777
A_24_P329065	NM_007048	BTN3A1	butyrophilin, subfamily 3, member A1	ref|NM_007048|ref|NM_006994|ref|NM_197974|ens|ENST00000289361	0.00015	down	24.9763
A_32_P234452	BU674073	NA	NA	gb|BU674073|thc|THC2540361|thc|THC2516755	0.00077	down	24.9701
A_23_P434919	NM_152304	RAB42	RAB42, member RAS oncogene family	ref|NM_152304|ens|ENST00000373826|gb|BC033175|gb|AK026009	0.00229	up	24.9593
A_23_P354146	NM_005546	ITK	IL2-inducible T-cell kinase	ref|NM_005546|ens|ENST00000231189|gb|AB209622|gb|D13720	0.00076	down	24.9523
A_23_P317839	NM_152779	GLIPR1L1	GLI pathogenesis-related 1 like 1	ref|NM_152779|gb|AY358731|ens|ENST00000312442|ens|ENST00000378695	0.00368	down	24.9467
A_23_P393099	NM_003226	TFF3	trefoil factor 3 (intestinal)	ref|NM_003226|gb|BC017859|ens|ENST00000291525|gb|L08044	0.00024	up	24.898
A_23_P115215	NM_005997	VPS72	vacuolar protein sorting 72 homolog (S. cerevisiae)	ref|NM_005997|ens|ENST00000368892|ens|ENST00000354473|gb|AK222935	0.00148	down	24.8889
A_23_P99442	NM_004119	FLT3	fms-related tyrosine kinase 3	ref|NM_004119|gb|Z26652|ens|ENST00000241453|ens|ENST00000380982	0.00185	up	24.8881
A_23_P103361	NM_005356	LCK	lymphocyte-specific protein tyrosine kinase	ref|NM_005356|ref|NM_001042771|gb|BC013200|ens|ENST00000336890	0.00196	down	24.8711
A_24_P192727	ENST00000224809	NA	NA	ens|ENST00000224809|ens|ENST00000370199|ens|ENST00000313664|gb|AF333487	0.00116	up	24.8568
A_23_P134426	NM_001005340	GPNMB	glycoprotein (transmembrane) nmb	ref|NM_001005340|ref|NM_002510|ens|ENST00000381990|ens|ENST00000258733	0.00115	up	24.8519
A_23_P103631	NM_006824	EBI3	Epstein-Barr virus induced 3	ref|NM_006824|ens|ENST00000236051|gb|AK223455|gb|BC007344	0.00196	up	24.8301
A_23_P88262	ENST00000390448	NA	NA	ens|ENST00000390448|gb|BC025727|gb|S60789|gb|X70305	0.00318	down	24.8264
A_23_P209564	NM_024843	CYBRD1	cytochrome b reductase 1	ref|NM_024843|gb|AK128495|ens|ENST00000321348|ens|ENST00000375252	0.00116	up	24.8163
A_23_P39682	NM_001079	ZAP70	zeta-chain (TCR) associated protein kinase 70kDa	ref|NM_001079|ref|NM_207519|gb|BC039039|ens|ENST00000264972	0.00194	down	24.8132
A_24_P933538	A_24_P933538	NA	NA		0.00342	down	24.803
A_23_P149529	NM_002353	TACSTD2	tumor-associated calcium signal transducer 2	ref|NM_002353|ens|ENST00000371225|gb|BC009409|gb|X13425	0.00133	up	24.7928
A_32_P195478	NM_005739	RASGRP1	RAS guanyl releasing protein 1 (calcium and DAG-regulated)	ref|NM_005739|gb|AY858556|gb|AY966005|gb|AY954625	0.00004	down	24.7768
A_23_P39682	NM_001079	ZAP70	zeta-chain (TCR) associated protein kinase 70kDa	ref|NM_001079|ref|NM_207519|gb|BC039039|ens|ENST00000264972	0.00213	down	24.7726
A_24_P37962	NM_002115	HK3	hexokinase 3 (white cell)	ref|NM_002115|ens|ENST00000292432|gb|DQ891078|gb|DQ894260	0.00089	up	24.7627
A_24_P945262	AK097139	CARD11	caspase recruitment domain family, member 11	gb|AK097139|thc|THC2480953	0.0027	down	24.7338
A_32_P7105	AA188598	NA	NA	gb|AA188598	0.0022	down	24.7271
A_23_P15864	NM_003927	MBD2	methyl-CpG binding domain protein 2	ref|NM_003927|gb|BC032638|ens|ENST00000256429|gb|AF072242	0.00077	up	24.7126
A_23_P85742	NM_003851	CREG1	cellular repressor of E1A-stimulated genes 1	ref|NM_003851|ens|ENST00000271377|gb|AK130006|gb|AK095456	0.0006	up	24.7111
A_23_P146717	ENST00000374106	NA	NA	ens|ENST00000374106|gb|BC007696	0.00202	down	24.6988
A_23_P103361	NM_005356	LCK	lymphocyte-specific protein tyrosine kinase	ref|NM_005356|ref|NM_001042771|gb|BC013200|ens|ENST00000336890	0.002	down	24.6873
A_23_P100730	NM_003726	SKAP1	src kinase associated phosphoprotein 1	ref|NM_003726|ref|NM_001075099|gb|BC047870|ens|ENST00000336915	0.00064	down	24.6761
A_23_P153741	NM_001700	AZU1	azurocidin 1	ref|NM_001700|ens|ENST00000233997|gb|DD333301|gb|BC093931	0.00017	up	24.6741
A_24_P127491	ENST00000330710	NA	NA	ens|ENST00000330710|gb|AB058725|thc|THC2713931	0.00407	down	24.6696
A_23_P20480	NM_018310	BRF2	BRF2, subunit of RNA polymerase III transcription initiation factor, BRF1-like	ref|NM_018310|gb|BC010648|ens|ENST00000220659|gb|AK001914	0.00159	down	24.6667
A_23_P120883	NM_002133	HMOX1	heme oxygenase (decycling) 1	ref|NM_002133|gb|X06985|gb|M23042|gb|BC001491	0.0009	up	24.6638
A_23_P133470	NM_014819	PJA2	praja ring finger 2	ref|NM_014819|ens|ENST00000361557|ens|ENST00000361189|gb|AB007898	0.00017	up	24.6606
A_23_P7066	NM_000661	RPL9	ribosomal protein L9	ref|NM_000661|ref|NM_001024921|ens|ENST00000295955|ens|ENST00000304700	0.00296	up	24.6589
A_24_P346126	ENST00000317633	NA	NA	ens|ENST00000317633|ens|ENST00000380751|ens|ENST00000383353|gb|BC021174	0.00306	up	24.649
A_23_P321354	NM_144649	TMEM71	transmembrane protein 71	ref|NM_144649|gb|BC105783|ens|ENST00000356838|ens|ENST00000377901	0.00014	up	24.6083
A_24_P12401	NM_001025366	VEGFA	vascular endothelial growth factor A	ref|NM_001025366|ref|NM_003376|ref|NM_001025367|ref|NM_001025368	0.00236	up	24.5873
A_24_P56240	NM_153634	CPNE8	copine VIII	ref|NM_153634|gb|BC046366|ens|ENST00000331366|gb|AK094998	0.00001	up	24.5822
A_23_P114656	NM_004964	HDAC1	histone deacetylase 1	ref|NM_004964|ens|ENST00000373548|ens|ENST00000373541|gb|D50405	0.00003	down	24.581
A_23_P887	NM_014002	IKBKE	inhibitor of kappa light polypeptide gene enhancer in B-cells, kinase epsilon	ref|NM_014002|gb|BC105923|ens|ENST00000367120|gb|AF241789	0.00052	down	24.5562
A_24_P298238	A_24_P298238	NA	NA		0.00389	up	24.5416
A_23_P258504	BC063385	TRA@	T cell receptor alpha locus	gb|BC063385|gb|BC070344|gb|BC106077|gb|BC070343	0.00268	down	24.5321
A_24_P235266	NM_001001555	GRB10	growth factor receptor-bound protein 10	ref|NM_001001555|ref|NM_001001550|ref|NM_005311|ref|NM_001001549	0.00222	up	24.523
A_23_P41987	NM_001496	GFRA3	GDNF family receptor alpha 3	ref|NM_001496|gb|AY359037|ens|ENST00000274721|ens|ENST00000378362	0.00179	down	24.5169
A_23_P401606	NM_005711	EDIL3	EGF-like repeats and discoidin I-like domains 3	ref|NM_005711|ens|ENST00000296591|gb|BC030828|thc|THC2464367	0.00243	down	24.5138
A_23_P350782	ENST00000390261	NA	NA	ens|ENST00000390261|ens|ENST00000390265|gb|AJ697902|gb|AY247658	0.00102	up	24.5115
A_24_P110487	A_24_P110487	NA	NA		0.00161	up	24.4877
A_23_P143885	NM_019555	ARHGEF3	Rho guanine nucleotide exchange factor (GEF) 3	ref|NM_019555|ens|ENST00000296315|ens|ENST00000338458|gb|AB209661	0.00023	down	24.4786
A_23_P33759	NM_004753	DHRS3	dehydrogenase/reductase (SDR family) member 3	ref|NM_004753|ens|ENST00000376223|gb|AF061741|gb|AK225057	0.0008	down	24.4574
A_23_P213584	NM_002115	HK3	hexokinase 3 (white cell)	ref|NM_002115|ens|ENST00000292432|gb|DQ891078|gb|DQ894260	0.0014	up	24.4532
A_23_P433588	NM_001406	EFNB3	ephrin-B3	ref|NM_001406|ens|ENST00000226091|ens|ENST00000380429|gb|U62775	0.00348	down	24.4483
A_23_P103361	NM_005356	LCK	lymphocyte-specific protein tyrosine kinase	ref|NM_005356|ref|NM_001042771|gb|BC013200|ens|ENST00000336890	0.0024	down	24.4444
A_23_P373100	BC020879	MGC24103	hypothetical MGC24103	gb|BC020879|gb|AK021795|gb|BX648870|thc|NP1159657	0.00004	down	24.4144
A_23_P85250	L33930	CD24	CD24 molecule	gb|L33930	0.00282	up	24.4104
A_23_P426565	NM_178519	C17orf55	chromosome 17 open reading frame 55	ref|NM_178519|ens|ENST00000332012|gb|BC108932|gb|BC108933	0.00339	up	24.4038
A_32_P69849	NM_001012978	BEX5	brain expressed, X-linked 5	ref|NM_001012978|ens|ENST00000333643|gb|BC106955|gb|BC042818	0.00025	up	24.3788
A_23_P6293	NM_018961	UBASH3A	ubiquitin associated and SH3 domain containing, A	ref|NM_018961|ref|NM_001001895|gb|BC028138|ens|ENST00000319294	0.00213	down	24.3771
A_23_P82523	NM_000927	ABCB1	ATP-binding cassette, sub-family B (MDR/TAP), member 1	ref|NM_000927|gb|AF016535|ens|ENST00000265724|gb|AM393352	0.00025	down	24.366
A_23_P320705	NM_006891	CRYGD	crystallin, gamma D	ref|NM_006891|gb|BC117338|gb|BC117340|gb|U66583	0.00281	up	24.3565
A_23_P36120	NM_022349	MS4A6A	membrane-spanning 4-domains, subfamily A, member 6A	ref|NM_022349|ref|NM_152851|ref|NM_152852|gb|AF172819	<0.00001	up	24.3514
A_23_P319626	NM_001420	ELAVL3	ELAV (embryonic lethal, abnormal vision, Drosophila)-like 3 (Hu antigen C)	ref|NM_001420|ref|NM_032281|ens|ENST00000359227|thc|THC2471754	0.00251	down	24.3503
A_23_P44505	NM_003597	KLF11	Kruppel-like factor 11	ref|NM_003597|ens|ENST00000305883|ens|ENST00000381814|gb|AK002186	0.00159	up	24.322
A_24_P156781	NM_003629	PIK3R3	phosphoinositide-3-kinase, regulatory subunit 3 (gamma)	ref|NM_003629|ens|ENST00000262741|ens|ENST00000372006|ens|ENST00000354242	0.0029	down	24.3191
A_23_P132175	NM_023004	RTN4R	reticulon 4 receptor	ref|NM_023004|ens|ENST00000043402|gb|AK054602|gb|AY358297	0.00142	down	24.3025
A_24_P316414	BC014346	NA	NA	gb|BC014346|thc|THC2505828	0.00239	down	24.2786
A_23_P39682	NM_001079	ZAP70	zeta-chain (TCR) associated protein kinase 70kDa	ref|NM_001079|ref|NM_207519|gb|BC039039|ens|ENST00000264972	0.00246	down	24.275
A_24_P140827	NM_005389	PCMT1	protein-L-isoaspartate (D-aspartate) O-methyltransferase	ref|NM_005389|gb|BC007501|ens|ENST00000367380|ens|ENST00000367384	0.00081	up	24.2574
A_23_P39682	NM_001079	ZAP70	zeta-chain (TCR) associated protein kinase 70kDa	ref|NM_001079|ref|NM_207519|gb|BC039039|ens|ENST00000264972	0.00258	down	24.2521
A_23_P68031	NM_003151	STAT4	signal transducer and activator of transcription 4	ref|NM_003151|ens|ENST00000358470|gb|DQ891548|gb|DQ894736	0.00443	down	24.2509
A_23_P142345	NM_002777	PRTN3	proteinase 3	ref|NM_002777|gb|M29142|ens|ENST00000234347|gb|BC096183	0.00007	up	24.2198
A_32_P167631	THC2616783	NA	NA	thc|THC2616783	0.0014	down	24.2018
A_23_P148768	NM_000130	F5	coagulation factor V (proaccelerin, labile factor)	ref|NM_000130|ens|ENST00000367797|ens|ENST00000362078|ens|ENST00000367796	0.00192	up	24.1901
A_24_P295245	NM_032467	ASPH	aspartate beta-hydroxylase	ref|NM_032467|ref|NM_020164|gb|BC066929|ens|ENST00000389203	0.00189	up	24.1593
A_23_P27215	NM_018955	UBB	ubiquitin B	ref|NM_018955|ens|ENST00000302182|ens|ENST00000344561|gb|BT020104	0.00016	down	24.1554
A_23_P62807	NM_016002	SCCPDH	saccharopine dehydrogenase (putative)	ref|NM_016002|ens|ENST00000366510|ens|ENST00000366509|gb|AK075178	0.00033	up	24.1542
A_23_P56734	NM_006895	HNMT	histamine N-methyltransferase	ref|NM_006895|ens|ENST00000280097|gb|AF523358|gb|AF523359	0.00051	up	24.1415
A_32_P159289	A_32_P159289	NA	NA		0.00001	up	24.1361
A_23_P82523	NM_000927	ABCB1	ATP-binding cassette, sub-family B (MDR/TAP), member 1	ref|NM_000927|gb|AF016535|ens|ENST00000265724|gb|AM393352	0.00019	down	24.1313
A_23_P422851	NM_138375	CABLES1	Cdk5 and Abl enzyme substrate 1	ref|NM_138375|gb|AK093243|gb|AX748010|gb|BC004124	0.00181	up	24.1255
A_23_P218047	NM_000424	KRT5	keratin 5	ref|NM_000424|ens|ENST00000252242|gb|M19723|gb|M21389	0.0004	down	24.1027
A_23_P44053	A_23_P44053	NA	NA		0.00086	up	24.0946
A_24_P119745	NM_212482	FN1	fibronectin 1	ref|NM_212482|ref|NM_212475|ref|NM_002026|ref|NM_212478	0.00328	up	24.0917
A_24_P297551	NM_178539	FAM19A2	family with sequence similarity 19 (chemokine (C-C motif)-like), member A2	ref|NM_178539|gb|BC028403|ens|ENST00000358343|gb|AK123580	0.00009	up	24.0884
A_23_P214111	NM_022113	KIF13A	kinesin family member 13A	ref|NM_022113|gb|AJ291578|gb|AY014404|ens|ENST00000259711	0.00013	up	24.0532
A_24_P124349	NM_025208	PDGFD	platelet derived growth factor D	ref|NM_025208|ref|NM_033135|ens|ENST00000302251|gb|DQ786218	0.0001	down	24.0447
A_23_P103361	NM_005356	LCK	lymphocyte-specific protein tyrosine kinase	ref|NM_005356|ref|NM_001042771|gb|BC013200|ens|ENST00000336890	0.00235	down	24.0427
A_23_P216176	NM_138715	MSR1	macrophage scavenger receptor 1	ref|NM_138715|ref|NM_138716|ens|ENST00000262101|ens|ENST00000382001	<0.00001	up	24.0321
A_23_P53630	NM_014868	RNF10	ring finger protein 10	ref|NM_014868|ens|ENST00000325954|gb|BC101709|gb|BC101715	0.00368	down	24.0041
A_24_P354689	NM_004598	SPOCK1	sparc/osteonectin, cwcv and kazal-like domains proteoglycan (testican) 1	ref|NM_004598|gb|AF231124|gb|BC030691|gb|BM684378	0.00108	up	24.0039
A_24_P413669	NM_001018053	PFKFB2	6-phosphofructo-2-kinase/fructose-2,6-biphosphatase 2	ref|NM_001018053|ens|ENST00000367079|gb|AB044805|thc|THC2472900	0.00246	up	23.9818
A_32_P71858	AK124776	NA	NA	gb|AK124776|thc|THC2644576	0.00562	up	23.9791
A_23_P106617	NM_021197	WFDC1	WAP four-disulfide core domain 1	ref|NM_021197|ens|ENST00000219454|gb|AF169631|gb|AF302109	0.0008	up	23.9761
A_32_P46171	CA314185	NA	NA	gb|CA314185|thc|THC2575223|thc|THC2500698	0.0005	up	23.964
A_23_P148768	NM_000130	F5	coagulation factor V (proaccelerin, labile factor)	ref|NM_000130|ens|ENST00000367797|ens|ENST00000362078|ens|ENST00000367796	0.00227	up	23.9572
A_32_P35506	AK057935	NA	NA	gb|AK057935|thc|THC2524368|thc|THC2541877	0.00319	down	23.9569
A_23_P163630	NM_152287	ZNF276	zinc finger protein 276	ref|NM_152287|gb|BC105959|ens|ENST00000289816|gb|AK096762	0.00276	down	23.946
A_23_P403284	NM_014562	OTX1	orthodenticle homeobox 1	ref|NM_014562|ens|ENST00000282549|gb|AK095680|gb|BC007621	0.00054	up	23.942
A_23_P145724	NM_006658	C7orf16	chromosome 7 open reading frame 16	ref|NM_006658|ens|ENST00000342032|gb|AF071789|gb|AF097730	0.0003	up	23.93
A_24_P931944	AK128814	NA	NA	gb|AK128814|gb|AK057835|thc|THC2495875	0.00065	down	23.9098
A_24_P29733	NM_012395	PFTK1	PFTAIRE protein kinase 1	ref|NM_012395|ens|ENST00000265741|ens|ENST00000380050|gb|AB020641	0.00051	up	23.9017
A_23_P321913	NM_022047	DEF6	differentially expressed in FDCP 6 homolog (mouse)	ref|NM_022047|ens|ENST00000316637|gb|AJ276095|gb|AK093613	0.00008	down	23.8281
A_32_P168756	AA714039	TTC39C	tetratricopeptide repeat domain 39C	gb|AA714039|gb|BU739045|gb|T03922|gb|BM676628	0.00146	down	23.8274
A_23_P61268	NM_016458	C8orf30A	chromosome 8 open reading frame 30A	ref|NM_016458|gb|AF151022|ens|ENST00000377406|ens|ENST00000325348	0.00035	down	23.8267
A_24_P29277	ENST00000380494	NA	NA	ens|ENST00000380494|thc|THC2623801	0.00049	up	23.8179
A_23_P151637	NM_002934	RNASE2	ribonuclease, RNase A family, 2 (liver, eosinophil-derived neurotoxin)	ref|NM_002934|ens|ENST00000304625|gb|BC093678|gb|BC093680	0.00022	up	23.8085
A_32_P42895	AW138903	NOTCH3	Notch homolog 3 (Drosophila)	gb|AW138903|gb|CB044174|gb|BI085933|gb|AA007598	0.00152	up	23.7926
A_24_P375599	XR_015944	RPL9P32	ribosomal protein L9 pseudogene 32	gb|XR_015944|ref|XR_015160	0.00323	up	23.7773
A_23_P152838	NM_002985	CCL5	chemokine (C-C motif) ligand 5	ref|NM_002985|ens|ENST00000293272|gb|BC008600|gb|M21121	0.00456	down	23.769
A_24_P396197	NM_002743	PRKCSH	protein kinase C substrate 80K-H	ref|NM_002743|ref|NM_001001329|ens|ENST00000252455|gb|AF144075	0.0001	down	23.7654
A_23_P82523	NM_000927	ABCB1	ATP-binding cassette, sub-family B (MDR/TAP), member 1	ref|NM_000927|gb|AF016535|ens|ENST00000265724|gb|AM393352	0.00052	down	23.7633
A_23_P253484	NM_016228	AADAT	aminoadipate aminotransferase	ref|NM_016228|ref|NM_182662|gb|BC031068|ens|ENST00000353187	0.00256	up	23.7613
A_23_P354277	NM_016474	C3orf19	chromosome 3 open reading frame 19	ref|NM_016474|gb|AF151046|gb|BC033897|ens|ENST00000303688	0.00003	down	23.743
A_23_P59005	NM_000593	TAP1	transporter 1, ATP-binding cassette, sub-family B (MDR/TAP)	ref|NM_000593|gb|BC014081|ens|ENST00000354258|ens|ENST00000383115	0.0023	down	23.7301
A_23_P18266	NM_006545	TUSC4	tumor suppressor candidate 4	ref|NM_006545|ens|ENST00000232501|gb|AK098161|gb|AF040708	0.00176	down	23.7288
A_23_P51534	NM_003175	XCL2	chemokine (C motif) ligand 2	ref|NM_003175|ref|NM_002995|ens|ENST00000367819|ens|ENST00000367818	0.00151	down	23.728
A_23_P47885	NM_153377	LRIG3	leucine-rich repeats and immunoglobulin-like domains 3	ref|NM_153377|gb|AY358295|ens|ENST00000320743|ens|ENST00000379141	0.0019	down	23.7123
A_23_P44105	NM_014387	LAT	linker for activation of T cells	ref|NM_014387|ref|NM_001014987|ref|NM_001014988|ref|NM_001014989	0.00082	down	23.693
A_24_P290087	A_24_P290087	NA	NA		0.00622	down	23.6635
A_23_P61068	A_23_P61068	NA	NA		0.0033	up	23.6546
A_23_P10025	NM_006159	NELL2	NEL-like 2 (chicken)	ref|NM_006159|ens|ENST00000333837|gb|D83018|gb|AK095637	0.00128	down	23.651
A_23_P52978	NM_014502	PRPF19	PRP19/PSO4 pre-mRNA processing factor 19 homolog (S. cerevisiae)	ref|NM_014502|ens|ENST00000227524|gb|AJ131186|gb|DQ893003	0.00259	down	23.6443
A_23_P18590	NM_152544	C4orf23	chromosome 4 open reading frame 23	ref|NM_152544|ens|ENST00000316290|ens|ENST00000285635|ens|ENST00000389737	0.00117	down	23.6364
A_23_P76718	NM_002498	NEK3	NIMA (never in mitosis gene a)-related kinase 3	ref|NM_002498|ref|NM_152720|gb|AK131359|ens|ENST00000258597	0.00013	up	23.633
A_23_P130466	NM_021089	ZNF8	zinc finger protein 8	ref|NM_021089|ens|ENST00000196548|gb|M29581|gb|BC039323	0.00425	down	23.6264
A_23_P337346	AK056484	hCG_2009921	hypothetical locus LOC441204	gb|AK056484	0.00044	down	23.6007
A_23_P318420	NM_018704	CTTNBP2NL	CTTNBP2 N-terminal like	ref|NM_018704|gb|BC016029|thc|THC2461606|thc|THC2766815	0.0011	up	23.5872
A_32_P151621	NM_001017980	VMA21	VMA21 vacuolar H+-ATPase homolog (S. cerevisiae)	ref|NM_001017980|ens|ENST00000330374|gb|AK096835|gb|AK091301	0.00013	up	23.5786
A_23_P354705	NM_003034	ST8SIA1	ST8 alpha-N-acetyl-neuraminide alpha-2,8-sialyltransferase 1	ref|NM_003034|gb|D26360|ens|ENST00000261197|gb|BC117285	0.00127	down	23.5754
A_23_P60259	NM_018112	TMEM38B	transmembrane protein 38B	ref|NM_018112|gb|AK001355|thc|THC2462928|thc|THC2632334	0.00257	up	23.5714
A_23_P201808	NM_003713	PPAP2B	phosphatidic acid phosphatase type 2B	ref|NM_003713|ref|NM_177414|ens|ENST00000371250|ens|ENST00000294390	0.00066	up	23.566
A_24_P944788	ENST00000222390	NA	NA	ens|ENST00000222390|gb|X16323|thc|THC2620755	0.00069	up	23.5595
A_23_P145024	NM_000024	ADRB2	adrenergic, beta-2-, receptor, surface	ref|NM_000024|gb|M15169|ens|ENST00000305988|gb|AK223025	0.00283	down	23.5479
A_32_P233735	NM_020704	FAM40B	family with sequence similarity 40, member B	ref|NM_020704|ens|ENST00000249344|gb|AB032996|thc|THC2498950	0.00384	down	23.5328
A_24_P193295	NM_198686	RAB15	RAB15, member RAS onocogene family	ref|NM_198686|ens|ENST00000267512|gb|BC040679|gb|BC014511	0.00024	down	23.5323
A_24_P915639	X86121	IL23A	interleukin 23, alpha subunit p19	gb|X86121	0.00314	down	23.5294
A_23_P257057	NM_016647	C8orf55	chromosome 8 open reading frame 55	ref|NM_016647|ens|ENST00000336138|gb|AK055140|gb|AK075407	0.00319	down	23.5294
A_23_P73220	NM_018351	FGD6	FYVE, RhoGEF and PH domain containing 6	ref|NM_018351|ens|ENST00000343958|gb|AK124904|gb|AK128492	0.00037	up	23.5204
A_24_P460419	THC2664068	NA	NA	thc|THC2664068|thc|THC2726424	0.00277	down	23.5187
A_24_P85539	NM_212482	FN1	fibronectin 1	ref|NM_212482|ref|NM_212475|ref|NM_002026|ref|NM_212478	0.0032	up	23.5143
A_23_P43175	NM_144710	SEPT10	septin 10	ref|NM_144710|ref|NM_178584|gb|BC020502|ens|ENST00000334001	0.00068	up	23.5119
A_23_P86884	NM_005146	SART1	squamous cell carcinoma antigen recognized by T cells	ref|NM_005146|ens|ENST00000389581|ens|ENST00000389582|ens|ENST00000312397	0.00031	down	23.511
A_24_P735072	AK128436	NA	NA	gb|AK128436|thc|THC2497386	0.00008	down	23.5018
A_24_P233995	NM_022746	MOSC1	MOCO sulphurase C-terminal domain containing 1	ref|NM_022746|gb|AK092439|ens|ENST00000366910|ens|ENST00000366909	0.00128	up	23.4923
A_23_P78608	NM_024898	DENND1C	DENN/MADD domain containing 1C	ref|NM_024898|gb|AK026410|ens|ENST00000381480|gb|AK055820	0.00113	down	23.4848
A_24_P251841	NM_030648	SETD7	SET domain containing (lysine methyltransferase) 7	ref|NM_030648|ens|ENST00000274031|gb|AB051504|gb|AK024846	<0.00001	up	23.4705
A_23_P82523	NM_000927	ABCB1	ATP-binding cassette, sub-family B (MDR/TAP), member 1	ref|NM_000927|gb|AF016535|ens|ENST00000265724|gb|AM393352	0.00069	down	23.4637
A_23_P250122	NM_020223	FAM20C	family with sequence similarity 20, member C	ref|NM_020223|gb|AK054704|gb|BC087853|gb|AL390147	0.00304	up	23.4343
A_24_P277934	NM_000089	COL1A2	collagen, type I, alpha 2	ref|NM_000089|ens|ENST00000297268|gb|X55525|gb|AK226074	0.0035	up	23.4298
A_23_P154367	NM_004226	STK17B	serine/threonine kinase 17b	ref|NM_004226|ens|ENST00000263955|gb|AB011421|gb|BC016040	<0.00001	up	23.4249
A_32_P164168	BM508017	NA	NA	gb|BM508017|gb|BQ024976|gb|BM978786|gb|BU782993	0.00081	down	23.4215
A_23_P48130	NM_031473	IFT81	intraflagellar transport 81 homolog (Chlamydomonas)	ref|NM_031473|ens|ENST00000361948|gb|BC004536|thc|THC2491187	0.00557	down	23.412
A_23_P103361	NM_005356	LCK	lymphocyte-specific protein tyrosine kinase	ref|NM_005356|ref|NM_001042771|gb|BC013200|ens|ENST00000336890	0.00293	down	23.4084
A_32_P127583	THC2650423	NA	NA	thc|THC2650423	0.00176	down	23.4001
A_23_P126540	NM_020683	ADORA3	adenosine A3 receptor	ref|NM_020683|ref|NM_001081976|gb|BC064411|ens|ENST00000369716	0.0026	up	23.3815
A_24_P277934	NM_000089	COL1A2	collagen, type I, alpha 2	ref|NM_000089|ens|ENST00000297268|gb|X55525|gb|AK226074	0.00455	up	23.3774
A_24_P935881	NM_022978	SERF1B	small EDRK-rich factor 1B (centromeric)	ref|NM_022978|ref|NM_021967|ens|ENST00000380750|ens|ENST00000317633	0.00461	up	23.3766
A_23_P132515	NM_017699	SIDT1	SID1 transmembrane family, member 1	ref|NM_017699|ens|ENST00000264852|gb|AK000181|thc|THC2472525	0.00053	down	23.3723
A_24_P945283	NM_021120	DLG3	discs, large homolog 3 (Drosophila)	ref|NM_021120|ref|NM_020730|gb|AB033058|ens|ENST00000374355	0.00422	down	23.3438
A_23_P351695	AK025335	AP1GBP1	AP1 gamma subunit binding protein 1	gb|AK025335|thc|THC2479077	0.00283	down	23.3333
A_23_P257087	NM_002612	PDK4	pyruvate dehydrogenase kinase, isozyme 4	ref|NM_002612|ens|ENST00000005178|gb|DQ891256|gb|DQ894441	0.00024	up	23.3275
A_32_P175282	BF149382	MPST	mercaptopyruvate sulfurtransferase	gb|BF149382|gb|BU730860|gb|AA779671|gb|AI126034	0.00496	down	23.3159
A_23_P1374	NM_006257	PRKCQ	protein kinase C, theta	ref|NM_006257|ens|ENST00000263125|gb|BC101465|gb|BC113359	0.00204	down	23.3097
A_32_P14744	NM_001019	RPS15A	ribosomal protein S15a	ref|NM_001019|ref|NM_001030009|ens|ENST00000322989|gb|AK027437	0.00236	up	23.3036
A_24_P188218	NM_002476	MYL4	myosin, light chain 4, alkali; atrial, embryonic	ref|NM_002476|ref|NM_001002841|ens|ENST00000354968|gb|M24121	0.00444	down	23.3014
A_32_P209230	NM_133467	CITED4	Cbp/p300-interacting transactivator, with Glu/Asp-rich carboxy-terminal domain, 4	ref|NM_133467|ens|ENST00000372638|gb|BC035496|gb|BC052559	0.00011	up	23.2882
A_24_P86968	NM_000733	CD3E	CD3e molecule, epsilon (CD3-TCR complex)	ref|NM_000733|ens|ENST00000361763|gb|X03884|gb|BC033578	0.00014	down	23.2828
A_23_P387943	NM_032982	CASP2	caspase 2, apoptosis-related cysteine peptidase	ref|NM_032982|ref|NM_032983|ens|ENST00000310447|ens|ENST00000350623	0.00008	down	23.2794
A_23_P122662	NM_018988	GFOD1	glucose-fructose oxidoreductase domain containing 1	ref|NM_018988|gb|AK000337|gb|AK027010|thc|THC2473326	0.00104	down	23.2704
A_23_P3177	NM_022054	KCNK13	potassium channel, subfamily K, member 13	ref|NM_022054|ens|ENST00000282146|gb|BC012779|thc|THC2479474	0.00365	up	23.2695
A_24_P115762	NM_148170	CTSC	cathepsin C	ref|NM_148170|ens|ENST00000320621|gb|BC100891|gb|BC100892	0.00079	down	23.2666
A_24_P924183	BC108736	MYO10	myosin X	gb|BC108736|gb|BC041694|gb|BC050682|gb|BC032669	0.00316	up	23.2636
A_24_P365807	NM_004429	EFNB1	ephrin-B1	ref|NM_004429|ens|ENST00000204961|gb|BC052979|gb|BC016649	0.00519	down	23.2477
A_23_P150741	AL080220	C2CD3	C2 calcium-dependent domain containing 3	gb|AL080220|gb|BC035599|thc|THC2718221	0.00159	down	23.2465
A_24_P405205	NM_001001396	ATP2B4	ATPase, Ca++ transporting, plasma membrane 4	ref|NM_001001396|ref|NM_001684|ens|ENST00000357681|ens|ENST00000356729	0.00202	down	23.2407
A_23_P103361	NM_005356	LCK	lymphocyte-specific protein tyrosine kinase	ref|NM_005356|ref|NM_001042771|gb|BC013200|ens|ENST00000336890	0.00301	down	23.2394
A_24_P503693	AF124170	IGL@	immunoglobulin lambda locus	gb|AF124170|gb|AF054640	0.001	up	23.2367
A_32_P163368	AW076051	PGLYRP1	peptidoglycan recognition protein 1	gb|AW076051|gb|AW467554	0.00019	up	23.2355
A_23_P81441	NM_130848	C5orf20	chromosome 5 open reading frame 20	ref|NM_130848|ens|ENST00000333591|gb|AK131088|gb|AB074498	0.00106	down	23.2301
A_24_P212096	NM_020443	NAV1	neuron navigator 1	ref|NM_020443|gb|BX648460|ens|ENST00000295624|ens|ENST00000367302	0.00011	up	23.2116
A_24_P912372	AB018297	KIAA0754	hypothetical LOC643314	gb|AB018297|ref|XM_941912|ref|XM_928706|thc|THC2671839	0.00036	down	23.1935
A_32_P27535	BC045676	C17orf72	chromosome 17 open reading frame 72	gb|BC045676|gb|AL161972|gb|AK021786|thc|THC2506067	0.00135	down	23.1877
A_23_P49254	NM_005331	HBQ1	hemoglobin, theta 1	ref|NM_005331|ens|ENST00000199708|gb|BC056686|gb|BM479599	0.00499	down	23.1867
A_24_P926044	A_24_P926044	NA	NA		0.00327	down	23.1818
A_23_P150255	NM_006328	RBM14	RNA binding motif protein 14	ref|NM_006328|ens|ENST00000310137|gb|AB209007|gb|AK021768	0.00035	down	23.1788
A_32_P147696	AK090602	LOC283143	hypothetical protein LOC283143	gb|AK090602|gb|AX746529|ref|XM_378312|ref|XM_943773	0.00349	up	23.1737
A_23_P390044	NM_002359	MAFG	v-maf musculoaponeurotic fibrosarcoma oncogene homolog G (avian)	ref|NM_002359|ref|NM_032711|ens|ENST00000357736|gb|BC012327	0.00035	up	23.172
A_32_P161836	THC2588392	NA	NA	thc|THC2588392|thc|THC2571795|thc|THC2572047|thc|THC2569700	0.0043	down	23.1643
A_24_P189739	NM_030640	DUSP16	dual specificity phosphatase 16	ref|NM_030640|gb|BC042101|ens|ENST00000228862|ens|ENST00000298573	0.00205	down	23.1586
A_32_P89730	THC2544977	NA	NA	thc|THC2544977	0.0021	up	23.1567
A_24_P79241	NM_014948	UBOX5	U-box domain containing 5	ref|NM_014948|ref|NM_199415|ens|ENST00000217173|ens|ENST00000348031	0.00141	down	23.1348
A_23_P138725	ENST00000285605	NA	NA	ens|ENST00000285605|gb|AF325259|gb|BC062544|gb|BC004995	0.00389	up	23.1218
A_32_P163443	AI820956	NA	NA	gb|AI820956|gb|BX102988	0.00035	down	23.1115
A_23_P77440	NM_173164	NFATC3	nuclear factor of activated T-cells, cytoplasmic, calcineurin-dependent 3	ref|NM_173164|ref|NM_173165|ref|NM_173163|ref|NM_004555	<0.00001	down	23.0952
A_23_P21324	NM_057179	TWIST2	twist homolog 2 (Drosophila)	ref|NM_057179|gb|BC103755|gb|BC017907|thc|THC2472275	0.00543	up	23.0921
A_24_P8075	AY251274	LOC100129637	hypothetical LOC100129637	gb|AY251274|gb|AK024496|gb|AK001742|thc|THC2495257	0.00181	down	23.0839
A_23_P57819	NM_014760	TATDN2	TatD DNase domain containing 2	ref|NM_014760|ens|ENST00000287652|gb|D86972|gb|BC090935	<0.00001	down	23.0769
A_24_P142305	NM_000517	HBA2	hemoglobin, alpha 2	ref|NM_000517|ref|NM_000558|ens|ENST00000251595|ens|ENST00000320868	0.00548	down	23.0724
A_24_P576191	AK092472	NA	NA	gb|AK092472|gb|CR593388|thc|THC2746775|thc|THC2601983	0.00641	up	23.0722
A_24_P306810	ENST00000319902	NA	NA	ens|ENST00000319902|gb|AB046838|ref|XM_941239|thc|THC2505826	0.00429	down	23.0714
A_23_P326204	NM_152621	SGMS2	sphingomyelin synthase 2	ref|NM_152621|ens|ENST00000359079|gb|AF452717|gb|BC041369	0.00003	up	23.0588
A_23_P37636	NM_032231	FAM96A	family with sequence similarity 96, member A	ref|NM_032231|ref|NM_001014812|ens|ENST00000300030|gb|BC008865	0.00109	up	23.0559
A_24_P932822	A_24_P932822	NA	NA		0.00228	down	23.0536
A_23_P8281	NM_000416	IFNGR1	interferon gamma receptor 1	ref|NM_000416|ens|ENST00000367739|ens|ENST00000367735|gb|AK127636	0.00035	up	23.0456
A_23_P351148	NM_053282	SH2D1B	SH2 domain containing 1B	ref|NM_053282|ens|ENST00000367929|ens|ENST00000359567|gb|BC066595	0.0031	down	23.0276
A_32_P49854	THC2697511	NA	NA	thc|THC2697511	0.00007	up	23.0212
A_32_P30434	THC2663361	NA	NA	thc|THC2663361	0.00202	down	23.0044
A_32_P175739	NM_000189	HK2	hexokinase 2	ref|NM_000189|gb|BC064369|ens|ENST00000290573|gb|CR749202	0.00002	up	22.9977
A_24_P76740	NM_032449	CC2D1B	coiled-coil and C2 domain containing 1B	ref|NM_032449|gb|AK130874|gb|BC016880|gb|BC039308	0.00061	down	22.9839
A_32_P131294	BM854107	NA	NA	gb|BM854107|thc|THC2674112	0.00136	down	22.9826
A_24_P928235	A_24_P928235	NA	NA		0.00254	down	22.9696
A_23_P15493	NM_001015509	NA	NA	ref|NM_001015509|ref|NM_016077|gb|BX647177|ens|ENST00000311824	<0.00001	up	22.9587
A_24_P85085	NM_032943	SYTL2	synaptotagmin-like 2	ref|NM_032943|ens|ENST00000389962|ens|ENST00000316356|gb|AK000170	0.00611	down	22.9418
A_24_P226069	NM_031950	FGFBP2	fibroblast growth factor binding protein 2	ref|NM_031950|ens|ENST00000382324|ens|ENST00000259989|ens|ENST00000382328	0.00478	down	22.9304
A_23_P91230	NM_003064	SLPI	secretory leukocyte peptidase inhibitor	ref|NM_003064|ens|ENST00000338380|gb|X04470|gb|AX772818	0.00086	up	22.9109
A_32_P56001	NM_012072	CD93	CD93 molecule	ref|NM_012072|ens|ENST00000246006|thc|THC2608950|thc|THC2609341	0.00153	up	22.9053
A_23_P23048	NM_002965	S100A9	S100 calcium binding protein A9	ref|NM_002965|gb|BC047681|ens|ENST00000295382|ens|ENST00000368738	0.00022	up	22.902
A_24_P236799	NM_006868	RAB31	RAB31, member RAS oncogene family	ref|NM_006868|ens|ENST00000306096|gb|AF183421|gb|BE620134	0.00232	up	22.89
A_23_P330611	NM_003387	WIPF1	WAS/WASL interacting protein family, member 1	ref|NM_003387|ref|NM_001077269|ens|ENST00000359761|gb|AF106062	0.00554	down	22.8893
A_23_P104563	NM_001876	CPT1A	carnitine palmitoyltransferase 1A (liver)	ref|NM_001876|ref|NM_001031847|ens|ENST00000376618|gb|BT009791	0.00153	up	22.8641
A_32_P217500	NM_001040441	ZBTB8	zinc finger and BTB domain containing 8	ref|NM_001040441|gb|BC015239|gb|AY157873|ens|ENST00000316459	0.0018	up	22.8512
A_24_P255384	XR_019110	RPL31P43	ribosomal protein L31 pseudogene 43	gb|XR_019110|ref|XR_016755|thc|THC2598564	0.0013	up	22.8505
A_23_P84344	NM_021805	SIGIRR	single immunoglobulin and toll-interleukin 1 receptor (TIR) domain	ref|NM_021805|gb|AY358342|ens|ENST00000332725|gb|AK093427	0.00279	down	22.8477
A_23_P169470	NM_001261	CDK9	cyclin-dependent kinase 9	ref|NM_001261|ens|ENST00000373264|ens|ENST00000373265|gb|X80230	0.00077	down	22.8438
A_23_P253949	AL137321	RAB2A	RAB2A, member RAS oncogene family	gb|AL137321|gb|BM979665|thc|THC2722967	0.00178	up	22.8111
A_24_P677559	BC032451	IGK@	immunoglobulin kappa locus	gb|BC032451|ens|ENST00000390270|ens|ENST00000390255|ens|ENST00000390277	0.00267	up	22.8103
A_23_P153958	THC2651501	NA	NA	thc|THC2651501	0.00382	down	22.8027
A_23_P89835	THC2619205	MAPRE2	microtubule-associated protein, RP/EB family, member 2	thc|THC2619205	0.00026	down	22.7788
A_32_P196669	A_32_P196669	NA	NA		0.00004	up	22.7496
A_24_P364066	BC030112	NA	NA	gb|BC030112|thc|THC2497641	0.00052	up	22.7414
A_23_P215720	NM_000492	CFTR	cystic fibrosis transmembrane conductance regulator (ATP-binding cassette sub-family C, member 7)	ref|NM_000492|ens|ENST00000003084|gb|M28668|thc|THC2463106	0.00191	down	22.7325
A_23_P254801	NM_002660	PLCG1	phospholipase C, gamma 1	ref|NM_002660|ref|NM_182811|ens|ENST00000244007|ens|ENST00000373271	0.00319	down	22.7182
A_23_P170574	NM_178310	SNAI3	snail homolog 3 (Drosophila)	ref|NM_178310|ens|ENST00000332281|gb|BC107058|gb|BC041461	0.0039	up	22.7064
A_23_P80048	NR_001442	NA	NA	ref|NR_001442|gb|AK023521|gb|AL833764|gb|AF218012	0.00053	up	22.6881
A_23_P104798	NM_001562	IL18	interleukin 18 (interferon-gamma-inducing factor)	ref|NM_001562|gb|AY266351|ens|ENST00000280357|gb|CR542001	0.00064	up	22.688
A_23_P254801	NM_002660	PLCG1	phospholipase C, gamma 1	ref|NM_002660|ref|NM_182811|ens|ENST00000244007|ens|ENST00000373271	0.00283	down	22.6874
A_24_P937366	U50555	NA	NA	gb|U50555|thc|NP091217	0.0003	down	22.6808
A_23_P43898	NM_173567	ABHD7	abhydrolase domain containing 7	ref|NM_173567|ens|ENST00000370383|gb|AK074822|gb|BC041475	0.002	down	22.6746
A_23_P4922	NM_199341	NA	NA	ref|NM_199341|gb|BC043386|thc|THC2481931|thc|THC2707280	0.00002	down	22.6734
A_24_P867111	AK095081	LOC283177	hypothetical protein LOC283177	gb|AK095081|thc|THC2629979	0.00632	down	22.6635
A_23_P108082	NM_032607	CREB3L3	cAMP responsive element binding protein 3-like 3	ref|NM_032607|gb|AB073612|ens|ENST00000078445|ens|ENST00000381943	0.00406	up	22.6563
A_23_P257296	NM_003226	TFF3	trefoil factor 3 (intestinal)	ref|NM_003226|gb|BC017859|ens|ENST00000291525|gb|L15203	0.00055	up	22.6546
A_23_P308136	NM_178125	TRIM50	tripartite motif-containing 50	ref|NM_178125|ref|NM_198853|ref|NM_198924|gb|AY081949	0.00562	down	22.6533
A_32_P799227	ENST00000372303	NA	NA	ens|ENST00000372303|ens|ENST00000372323|ens|ENST00000381691|ens|ENST00000381707	0.00287	down	22.6398
A_23_P3215	AF168717	DTWD1	DTW domain containing 1	gb|AF168717	0.00579	up	22.6394
A_23_P148768	NM_000130	F5	coagulation factor V (proaccelerin, labile factor)	ref|NM_000130|ens|ENST00000367797|ens|ENST00000362078|ens|ENST00000367796	0.00423	up	22.6364
A_24_P607904	AK026826	ITGA9	integrin, alpha 9	gb|AK026826|gb|BX647350|thc|THC2491613|thc|THC2588476	0.00015	up	22.6309
A_23_P52727	NM_182964	NAV2	neuron navigator 2	ref|NM_182964|ref|NM_145117|gb|AB037840|gb|AB063115	0.00186	up	22.6258
A_23_P19691	NM_014320	HEBP2	heme binding protein 2	ref|NM_014320|ens|ENST00000058691|ens|ENST00000367697|gb|AF411610	<0.00001	up	22.619
A_24_P62505	NM_015101	GLT25D2	glycosyltransferase 25 domain containing 2	ref|NM_015101|ens|ENST00000367522|ens|ENST00000361927|ens|ENST00000367521	0.00194	down	22.6153
A_23_P62764	NM_024296	CCDC28B	coiled-coil domain containing 28B	ref|NM_024296|gb|BC022848|ens|ENST00000373604|ens|ENST00000373602	0.00186	down	22.6131
A_24_P538459	AF076205	NA	NA	gb|AF076205|gb|AF076203|gb|AF076194	0.00326	up	22.6038
A_23_P424793	AF130063	LOC100129449	PRO2055	gb|AF130063	0.00612	down	22.5995
A_23_P207564	NM_002984	CCL4	chemokine (C-C motif) ligand 4	ref|NM_002984|ref|NM_001001435|ref|NM_207007|gb|AY766448	0.00333	down	22.5861
A_24_P760324	A_24_P760324	NA	NA		0.00271	down	22.5806
A_23_P36658	NM_145791	MGST1	microsomal glutathione S-transferase 1	ref|NM_145791|ref|NM_145764|ref|NM_145792|ref|NM_020300	0.00054	up	22.576
A_24_P277934	NM_000089	COL1A2	collagen, type I, alpha 2	ref|NM_000089|ens|ENST00000297268|gb|X55525|gb|AK226074	0.00533	up	22.5667
A_24_P456367	AK021614	NA	NA	gb|AK021614|thc|THC2617161	0.00264	down	22.564
A_23_P99642	NM_003982	SLC7A7	solute carrier family 7 (cationic amino acid transporter, y+ system), member 7	ref|NM_003982|ens|ENST00000285850|gb|AL365451|gb|AB209591	0.00048	up	22.5601
A_23_P160881	NM_001009568	SMPDL3B	sphingomyelin phosphodiesterase, acid-like 3B	ref|NM_001009568|ref|NM_014474|ens|ENST00000373888|ens|ENST00000373894	<0.00001	up	22.5532
A_23_P85703	NM_005686	SOX13	SRY (sex determining region Y)-box 13	ref|NM_005686|gb|BC106038|ens|ENST00000367204|gb|AF116571	0.00273	down	22.553
A_23_P325676	NM_138783	ZNF653	zinc finger protein 653	ref|NM_138783|ens|ENST00000293771|gb|AY072704|gb|BC016816	0.0042	down	22.5352
A_32_P204258	THC2688486	NA	NA	thc|THC2688486	0.00017	down	22.5124
A_24_P256512	NM_001007532	STH	saitohin	ref|NM_001007532|gb|AY179170|gb|BC130319|gb|BC130321	0.00523	down	22.497
A_23_P132560	NM_145037	FAM55C	family with sequence similarity 55, member C	ref|NM_145037|ens|ENST00000273347|ens|ENST00000344973|gb|AK054664	0.0018	up	22.4937
A_23_P2293	NM_033647	HELB	helicase (DNA) B	ref|NM_033647|ens|ENST00000247815|gb|AF319995|thc|THC2478231	0.00458	down	22.4932
A_24_P119745	NM_212482	FN1	fibronectin 1	ref|NM_212482|ref|NM_212475|ref|NM_002026|ref|NM_212478	0.00287	up	22.4921
A_23_P48936	NM_005902	SMAD3	SMAD family member 3	ref|NM_005902|gb|BC000414|ens|ENST00000327367|gb|BC007496	0.00178	down	22.4862
A_24_P16004	ENST00000390271	NA	NA	ens|ENST00000390271|thc|NP102468	0.00304	up	22.465
A_24_P299271	NM_014911	AAK1	AP2 associated kinase 1	ref|NM_014911|ens|ENST00000390657|ens|ENST00000360555|gb|BC002695	0.0002	down	22.4649
A_23_P207736	AK023077	USP36	ubiquitin specific peptidase 36	gb|AK023077|gb|AL359624|thc|THC2493307	0.00153	down	22.4436
A_23_P103361	NM_005356	LCK	lymphocyte-specific protein tyrosine kinase	ref|NM_005356|ref|NM_001042771|gb|BC013200|ens|ENST00000336890	0.00378	down	22.4425
A_24_P221366	NM_001019	RPS15A	ribosomal protein S15a	ref|NM_001019|ref|NM_001030009|ens|ENST00000322989|gb|AK027437	0.00287	up	22.4418
A_32_P113472	CA314451	CDC42EP3	CDC42 effector protein (Rho GTPase binding) 3	gb|CA314451|gb|BM991188|gb|BU677070|gb|AL567387	0.00397	down	22.437
A_32_P45009	NM_005896	IDH1	isocitrate dehydrogenase 1 (NADP+), soluble	ref|NM_005896|gb|BX537411|ens|ENST00000345146|gb|BC012846	0.00295	up	22.4113
A_23_P254801	NM_002660	PLCG1	phospholipase C, gamma 1	ref|NM_002660|ref|NM_182811|ens|ENST00000244007|ens|ENST00000373271	0.00318	down	22.4057
A_24_P829156	AK025221	LOC441108	hypothetical gene supported by AK128882	gb|AK025221|thc|THC2602117	0.00469	down	22.3981
A_23_P320124	ENST00000382691	NA	NA	ens|ENST00000382691|ens|ENST00000329229|gb|BC069283|gb|AF355799	0.00106	up	22.3781
A_23_P156185	NM_133456	SHROOM1	shroom family member 1	ref|NM_133456|ens|ENST00000319854|ens|ENST00000378678|ens|ENST00000378679	0.00502	up	22.3765
A_23_P427645	NM_012464	TLL1	tolloid-like 1	ref|NM_012464|ens|ENST00000061240|gb|AK021908|thc|THC2604721	0.00042	down	22.3687
A_24_P867201	AK022997	NA	NA	gb|AK022997|gb|BC041400|thc|THC2632767	0.00044	up	22.3491
A_23_P52323	NM_000494	COL17A1	collagen, type XVII, alpha 1	ref|NM_000494|ens|ENST00000353479|ens|ENST00000369733|gb|AF136185	0.00043	up	22.346
A_23_P385246	NM_153331	KCTD6	potassium channel tetramerisation domain containing 6	ref|NM_153331|ens|ENST00000355076|gb|AK027572|gb|AK074934	0.00061	up	22.3301
A_24_P296280	NM_018145	FAM82A2	family with sequence similarity 82, member A2	ref|NM_018145|gb|AK025963|ens|ENST00000338376|gb|AB000782	0.00015	down	22.3235
A_23_P95718	ENST00000269142	NA	NA	ens|ENST00000269142|gb|AB234096|gb|Y09321|thc|NP090764	0.001	up	22.3126
A_24_P460405	BX108833	NA	NA	gb|BX108833	0.00135	down	22.3028
A_24_P307827	NM_001080435	WHAMM	WAS protein homolog associated with actin, golgi membranes and microtubules	ref|NM_001080435|gb|AK126887|ens|ENST00000286760|gb|AK097947	0.00002	down	22.3011
A_23_P375494	NM_004364	CEBPA	CCAAT/enhancer binding protein (C/EBP), alpha	ref|NM_004364|gb|BC063874|gb|Y11525|gb|X87248	0.00266	up	22.2919
A_23_P27894	NM_014649	SAFB2	scaffold attachment factor B2	ref|NM_014649|ens|ENST00000252542|gb|D50928|thc|THC2512955	0.00355	down	22.2857
A_23_P23705	ENST00000371847	NA	NA	ens|ENST00000371847|gb|BC040655|thc|THC2680698|thc|THC2607642	<0.00001	up	22.2743
A_23_P64721	NM_006018	NIACR2	niacin receptor 2	ref|NM_006018|ref|NM_177551|gb|D10923|gb|BC038955	0.00524	down	22.265
A_23_P111583	NM_001001547	CD36	CD36 molecule (thrombospondin receptor)	ref|NM_001001547|ref|NM_000072|ref|NM_001001548|ens|ENST00000309881	0.00016	up	22.2594
A_23_P3215	AF168717	DTWD1	DTW domain containing 1	gb|AF168717	0.00544	up	22.2588
A_23_P133691	NM_021244	RRAGD	Ras-related GTP binding D	ref|NM_021244|gb|BC003088|gb|AF272036|thc|THC2574246	0.00322	up	22.2551
A_32_P162709	CR624517	NA	NA	gb|CR624517|thc|THC2725109	0.00004	up	22.2529
A_23_P120941	NM_001675	ATF4	activating transcription factor 4 (tax-responsive enhancer element B67)	ref|NM_001675|ref|NM_182810|ens|ENST00000337304|gb|CR450353	0.00003	up	22.2513
A_23_P11685	NM_024420	PLA2G4A	phospholipase A2, group IVA (cytosolic, calcium-dependent)	ref|NM_024420|ens|ENST00000367466|gb|BC114340|gb|M68874	0.00002	up	22.2508
A_24_P658427	NM_005596	NFIB	nuclear factor I/B	ref|NM_005596|ens|ENST00000380959|gb|AK094066|gb|AK129782	0.00014	up	22.2313
A_23_P167313	NM_002938	RNF4	ring finger protein 4	ref|NM_002938|ens|ENST00000314289|gb|AK128038|gb|AB000468	0.00037	down	22.2222
A_32_P358887	NM_003759	SLC4A4	solute carrier family 4, sodium bicarbonate cotransporter, member 4	ref|NM_003759|ens|ENST00000340595|gb|AF007216|gb|AK226164	0.00284	down	22.2035
A_23_P214026	NM_001999	FBN2	fibrillin 2	ref|NM_001999|ens|ENST00000262464|gb|U03272|thc|THC2749486	0.00118	up	22.2017
A_23_P9209	NM_018376	NIPSNAP3B	nipsnap homolog 3B (C. elegans)	ref|NM_018376|ens|ENST00000374762|ens|ENST00000374764|ens|ENST00000374760	0.00021	up	22.1983
A_23_P330895	NM_001001716	NFKBIB	nuclear factor of kappa light polypeptide gene enhancer in B-cells inhibitor, beta	ref|NM_001001716|gb|AB209784|gb|BC071992|gb|BC007197	0.00094	down	22.179
A_24_P879895	BC043357	NA	NA	gb|BC043357|thc|THC2609358	0.00294	down	22.1661
A_23_P98382	NM_012459	TIMM8B	translocase of inner mitochondrial membrane 8 homolog B (yeast)	ref|NM_012459|gb|BC000711|ens|ENST00000280354|gb|AF165967	0.00119	up	22.1486
A_23_P79069	NM_022904	RASAL3	RAS protein activator like 3	ref|NM_022904|gb|AK024488|gb|BC030281|ens|ENST00000343625	0.00069	down	22.1437
A_23_P207650	NM_000018	ACADVL	acyl-Coenzyme A dehydrogenase, very long chain	ref|NM_000018|ref|NM_001033859|ens|ENST00000322910|ens|ENST00000350303	0.00133	up	22.1411
A_23_P328729	NM_020803	KLHL8	kelch-like 8 (Drosophila)	ref|NM_020803|gb|BC041384|gb|CR749265|gb|AK128827	0.00001	up	22.135
A_23_P3215	AF168717	DTWD1	DTW domain containing 1	gb|AF168717	0.00547	up	22.1258
A_23_P335214	NM_021139	UGT2B4	UDP glucuronosyltransferase 2 family, polypeptide B4	ref|NM_021139|gb|AY529122|ens|ENST00000305107|gb|DQ895203	0.0014	up	22.1019
A_23_P354547	ENST00000324076	NA	NA	ens|ENST00000324076|gb|AK074144|gb|BQ706149	0.00092	down	22.1013
A_32_P104746	NM_020972	ZFYVE28	zinc finger, FYVE domain containing 28	ref|NM_020972|gb|BC041866|ens|ENST00000290974|gb|AK126692	0.00171	down	22.0987
A_23_P68006	NM_000877	IL1R1	interleukin 1 receptor, type I	ref|NM_000877|ens|ENST00000233946|gb|BC067508|gb|BC067506	0.00209	up	22.0851
A_23_P161194	NM_003380	VIM	vimentin	ref|NM_003380|ens|ENST00000224237|ens|ENST00000359892|gb|CR407690	0.00354	up	22.08
A_24_P688872	A_24_P688872	NA	NA		0.00342	down	22.067
A_23_P78092	NM_001003927	EVI2A	ecotropic viral integration site 2A	ref|NM_001003927|ref|NM_014210|gb|BC035572|ens|ENST00000247270	0.00104	up	22.0613
A_23_P37391	BC110042	CCDC85C	coiled-coil domain containing 85C	gb|BC110042|gb|BC031990|gb|AK093969|gb|AK123840	0.00026	down	22.0588
A_23_P83463	NM_004261	2009-09-15	15 kDa selenoprotein	ref|NM_004261|ref|NM_203341|ens|ENST00000370554|ens|ENST00000331835	0.00304	up	22.0472
A_24_P414371	NM_000944	PPP3CA	protein phosphatase 3 (formerly 2B), catalytic subunit, alpha isoform	ref|NM_000944|ens|ENST00000323055|gb|AL353950|thc|THC2466026	0.00153	up	22.0418
A_24_P11506	NM_003937	KYNU	kynureninase (L-kynurenine hydrolase)	ref|NM_003937|ref|NM_001032998|ens|ENST00000375773|ens|ENST00000264170	<0.00001	up	22.0408
A_23_P121234	A_23_P121234	NA	NA		0.0031	up	22.0264
A_24_P829107	AK090885	NA	NA	gb|AK090885|gb|BC050403|gb|BC032475|gb|AK000271	0.00254	down	22.0139
A_23_P388914	NM_138414	CCDC101	coiled-coil domain containing 101	ref|NM_138414|ens|ENST00000317058|gb|AK057008|gb|BC011981	0.00017	down	22.007
A_24_P195327	XR_019253	NA	NA	gb|XR_019253	0.00059	up	22.0047
A_23_P42144	NM_000287	PEX6	peroxisomal biogenesis factor 6	ref|NM_000287|ens|ENST00000304611|gb|AB208906|gb|AB051076	0.00384	down	21.9922
A_24_P277934	NM_000089	COL1A2	collagen, type I, alpha 2	ref|NM_000089|ens|ENST00000297268|gb|X55525|gb|AK226074	0.00641	up	21.9882
A_23_P68922	NM_033386	MICALL1	MICAL-like 1	ref|NM_033386|gb|AL834373|ens|ENST00000215957|gb|CR749566	0.00707	down	21.978
A_23_P152002	NM_004049	BCL2A1	BCL2-related protein A1	ref|NM_004049|gb|AY234180|ens|ENST00000267953|ens|ENST00000335661	0.00142	up	21.9727
A_24_P50753	NM_199040	NUDT4	nudix (nucleoside diphosphate linked moiety X)-type motif 4	ref|NM_199040|ref|NM_019094|gb|BC012069|gb|AF067803	0.00028	up	21.9697
A_23_P24485	NM_006165	NFRKB	nuclear factor related to kappaB binding protein	ref|NM_006165|gb|X80878|gb|BC063280|ens|ENST00000304521	0.00173	down	21.9601
A_23_P106694	NM_002768	CHMP1A	chromatin modifying protein 1A	ref|NM_002768|ref|NM_001083314|gb|BC007527|ens|ENST00000253475	0.00099	down	21.9557
A_23_P333705	NM_002498	NEK3	NIMA (never in mitosis gene a)-related kinase 3	ref|NM_002498|ref|NM_152720|gb|AK131359|ens|ENST00000258597	0.00052	up	21.9512
A_24_P379353	NM_152499	CCDC24	coiled-coil domain containing 24	ref|NM_152499|ens|ENST00000372318|gb|AY487420|gb|BC047313	0.00104	up	21.9483
A_23_P259763	AF471475	NA	NA	gb|AF471475|thc|THC2542377	0.00276	up	21.9424
A_23_P82523	NM_000927	ABCB1	ATP-binding cassette, sub-family B (MDR/TAP), member 1	ref|NM_000927|gb|AF016535|ens|ENST00000265724|gb|AM393352	0.00014	down	21.9361
A_23_P130113	NM_080912	ASGR2	asialoglycoprotein receptor 2	ref|NM_080912|ref|NM_001181|ref|NM_080913|ref|NM_080914	0.00508	up	21.9334
A_24_P274814	NM_030984	TBXAS1	thromboxane A synthase 1 (platelet)	ref|NM_030984|ref|NM_001061|gb|BC014117|gb|BC041157	0.00071	up	21.931
A_23_P114656	NM_004964	HDAC1	histone deacetylase 1	ref|NM_004964|ens|ENST00000373548|ens|ENST00000373541|gb|D50405	0.00008	down	21.9101
A_24_P194934	ENST00000273844	NA	NA	ens|ENST00000273844|ref|XM_373027|ref|XM_937120	0.00245	up	21.9035
A_23_P1280	NM_015947	ASCC1	activating signal cointegrator 1 complex subunit 1	ref|NM_015947|gb|AK094170|ens|ENST00000317126|ens|ENST00000373101	0.00407	up	21.9031
A_24_P96325	NM_032527	NA	NA	ref|NM_032527|ref|NM_001083113|ref|NM_181485|gb|BC019338	0.00019	down	21.8884
A_32_P17504	THC2698682	NA	NA	thc|THC2698682	0.00103	up	21.8695
A_23_P219197	NM_134427	RGS3	regulator of G-protein signaling 3	ref|NM_134427|ref|NM_144488|ref|NM_130795|ref|NM_021106	0.00302	down	21.8644
A_23_P104798	NM_001562	IL18	interleukin 18 (interferon-gamma-inducing factor)	ref|NM_001562|gb|AY266351|ens|ENST00000280357|gb|CR542001	0.00033	up	21.8511
A_23_P162668	NM_001874	CPM	carboxypeptidase M	ref|NM_001874|ref|NM_198320|ref|NM_001005502|ens|ENST00000338356	0.00018	up	21.8144
A_24_P800734	AK024184	NA	NA	gb|AK024184|thc|THC2634229	0.00016	down	21.8143
A_23_P114656	NM_004964	HDAC1	histone deacetylase 1	ref|NM_004964|ens|ENST00000373548|ens|ENST00000373541|gb|D50405	0.00002	down	21.7765
A_32_P88626	NM_023923	PHACTR4	phosphatase and actin regulator 4	ref|NM_023923|ref|NM_001048183|gb|BC029266|ens|ENST00000373835	0.00307	down	21.7759
A_23_P380857	NM_030643	APOL4	apolipoprotein L, 4	ref|NM_030643|ref|NM_145660|gb|AY014914|gb|AY014915	0.00347	down	21.7708
A_23_P254801	NM_002660	PLCG1	phospholipase C, gamma 1	ref|NM_002660|ref|NM_182811|ens|ENST00000244007|ens|ENST00000373271	0.00404	down	21.766
A_32_P160883	NM_006154	NEDD4	neural precursor cell expressed, developmentally down-regulated 4	ref|NM_006154|ref|NM_198400|ens|ENST00000338963|ens|ENST00000164316	0.00368	up	21.7611
A_23_P104798	NM_001562	IL18	interleukin 18 (interferon-gamma-inducing factor)	ref|NM_001562|gb|AY266351|ens|ENST00000280357|gb|CR542001	0.00044	up	21.7604
A_23_P41227	NM_001627	ALCAM	activated leukocyte cell adhesion molecule	ref|NM_001627|gb|AK127617|gb|AL833702|ens|ENST00000389926	0.00003	up	21.753
A_23_P163492	NM_003933	BAIAP3	BAI1-associated protein 3	ref|NM_003933|gb|AL834321|ens|ENST00000324385|gb|AB018277	0.00288	up	21.7411
A_23_P127033	NM_024693	ECHDC3	enoyl Coenzyme A hydratase domain containing 3	ref|NM_024693|gb|BC009617|ens|ENST00000379215|gb|AF275677	0.00268	up	21.7268
A_23_P112026	NM_002164	IDO1	indoleamine 2,3-dioxygenase 1	ref|NM_002164|ens|ENST00000253513|gb|AY221100|gb|M34455	0.00444	down	21.7267
A_23_P257111	NM_000507	FBP1	fructose-1,6-bisphosphatase 1	ref|NM_000507|ens|ENST00000375326|gb|L10320|gb|U47918	0.00272	up	21.7173
A_24_P923629	ENST00000357137	NA	NA	ens|ENST00000357137|gb|BC032537|gb|BC016735|gb|BX648018	0.00617	down	21.7152
A_23_P91283	NM_020356	CASS4	Cas scaffolding protein family member 4	ref|NM_020356|gb|BC027951|ens|ENST00000360314|ens|ENST00000371336	0.00428	down	21.7061
A_24_P109214	NM_001645	APOC1	apolipoprotein C-I	ref|NM_001645|ens|ENST00000252491|gb|X00570|gb|BC009698	0.00048	up	21.7042
A_23_P46755	NM_016204	GDF2	growth differentiation factor 2	ref|NM_016204|ens|ENST00000249598|gb|AF188285|thc|THC2483043	0.00491	up	21.6617
A_23_P254801	NM_002660	PLCG1	phospholipase C, gamma 1	ref|NM_002660|ref|NM_182811|ens|ENST00000244007|ens|ENST00000373271	0.00372	down	21.657
A_23_P107959	NM_015953	NOSIP	nitric oxide synthase interacting protein	ref|NM_015953|ens|ENST00000339093|gb|AF132959|gb|BC011249	0.00097	down	21.6517
A_23_P169470	NM_001261	CDK9	cyclin-dependent kinase 9	ref|NM_001261|ens|ENST00000373264|ens|ENST00000373265|gb|X80230	0.00177	down	21.6495
A_23_P114656	NM_004964	HDAC1	histone deacetylase 1	ref|NM_004964|ens|ENST00000373548|ens|ENST00000373541|gb|D50405	0.0001	down	21.6438
A_23_P254801	NM_002660	PLCG1	phospholipase C, gamma 1	ref|NM_002660|ref|NM_182811|ens|ENST00000244007|ens|ENST00000373271	0.00421	down	21.6425
A_24_P910169	A_24_P910169	NA	NA		0.00029	down	21.6405
A_32_P186121	NM_002637	PHKA1	phosphorylase kinase, alpha 1 (muscle)	ref|NM_002637|gb|BC104944|ens|ENST00000373542|ens|ENST00000339490	0.00183	up	21.6361
A_32_P132194	BX110985	NA	NA	gb|BX110985|thc|THC2658314	0.00127	up	21.619
A_24_P205154	BC015370	NA	NA	gb|BC015370	0.00203	down	21.6102
A_24_P208045	NM_025191	EDEM3	ER degradation enhancer, mannosidase alpha-like 3	ref|NM_025191|gb|AK023095|gb|BC016464|ens|ENST00000318130	0.00122	up	21.6088
A_23_P121665	NM_020777	SORCS2	sortilin-related VPS10 domain containing receptor 2	ref|NM_020777|ens|ENST00000360303|gb|AB037750|gb|BC035257	0.00192	up	21.5926
A_24_P336441	ENST00000366716	NA	NA	ens|ENST00000366716	0.00381	down	21.5897
A_23_P302470	NM_014465	SULT1B1	sulfotransferase family, cytosolic, 1B, member 1	ref|NM_014465|ens|ENST00000310613|gb|BC010895|gb|D89479	0.00007	up	21.5892
A_23_P111288	NM_016462	TMEM14C	transmembrane protein 14C	ref|NM_016462|ens|ENST00000229563|ens|ENST00000342277|gb|BC002496	0.00325	up	21.5888
A_23_P145024	NM_000024	ADRB2	adrenergic, beta-2-, receptor, surface	ref|NM_000024|gb|M15169|ens|ENST00000305988|gb|AK223025	0.00409	down	21.5875
A_32_P21384	NM_000985	RPL17	ribosomal protein L17	ref|NM_000985|ref|NM_001035006|ens|ENST00000310102|ens|ENST00000332968	0.00555	up	21.5848
A_24_P782102	A_24_P782102	NA	NA		0.00087	up	21.582
A_23_P161190	NM_003380	VIM	vimentin	ref|NM_003380|gb|AK093924|ens|ENST00000224237|ens|ENST00000328538	0.00539	up	21.58
A_32_P59302	ENST00000372583	NA	NA	ens|ENST00000372583|ens|ENST00000372584|gb|BC080552|thc|THC2628065	0.00047	down	21.5729
A_23_P44155	NM_198196	CD96	CD96 molecule	ref|NM_198196|ref|NM_005816|ens|ENST00000283285|ens|ENST00000352690	0.00168	down	21.5569
A_23_P2203	NM_016281	TAOK3	TAO kinase 3	ref|NM_016281|ens|ENST00000359166|ens|ENST00000359811|gb|AF263311	0.00199	down	21.5528
A_23_P21548	NM_024605	ARHGAP10	Rho GTPase activating protein 10	ref|NM_024605|gb|AK024549|gb|BC047914|ens|ENST00000336498	0.00797	down	21.5488
A_32_P118655	AL137653	CTBP1	C-terminal binding protein 1	gb|AL137653|thc|THC2563777	0.00481	down	21.5479
A_23_P146233	NM_000237	LPL	lipoprotein lipase	ref|NM_000237|gb|M15856|thc|THC2465480	0.00258	up	21.5442
A_24_P408449	THC2663668	NA	NA	thc|THC2663668	0.00464	down	21.5396
A_23_P81973	NM_014234	HSD17B8	hydroxysteroid (17-beta) dehydrogenase 8	ref|NM_014234|ens|ENST00000374662|ens|ENST00000230236|ens|ENST00000383080	0.00193	up	21.5339
A_24_P652174	AK001007	NA	NA	gb|AK001007|thc|THC2522669	0.0036	down	21.5328
A_23_P66454	NM_018530	GSDMB	gasdermin B	ref|NM_018530|ref|NM_001042471|gb|AF258572|gb|AK000409	0.00375	down	21.5278
A_23_P110386	AK021912	USP46	ubiquitin specific peptidase 46	gb|AK021912|thc|THC2486242	0.00636	up	21.5201
A_23_P392501	AK056421	TNRC6C	trinucleotide repeat containing 6C	gb|AK056421|gb|AK000022|thc|THC2470408|thc|THC2480159	0.00629	down	21.518
A_23_P79094	NM_006865	LILRA3	leukocyte immunoglobulin-like receptor, subfamily A (without TM domain), member 3	ref|NM_006865|gb|AF014924|gb|AF009221|ens|ENST00000251390	0.0027	up	21.5144
A_23_P85952	NM_024901	DENND2D	DENN/MADD domain containing 2D	ref|NM_024901|gb|AK026110|ens|ENST00000357640|ens|ENST00000369752	0.0008	down	21.5078
A_24_P150580	NM_016563	RASL12	RAS-like, family 12	ref|NM_016563|ens|ENST00000220062|gb|AF233588|gb|BC053734	0.00335	down	21.4953
A_24_P937915	S74620	PRKCH	protein kinase C, eta	gb|S74620|thc|NP090043	0.00222	down	21.4832
A_32_P10424	AX721252	NA	NA	gb|AX721252|thc|THC2546494	0.0044	up	21.4807
A_23_P145786	NM_032951	MLXIPL	MLX interacting protein-like	ref|NM_032951|ref|NM_032953|ref|NM_032952|ref|NM_032954	0.00499	down	21.4771
A_24_P117620	NM_018584	CAMK2N1	calcium/calmodulin-dependent protein kinase II inhibitor 1	ref|NM_018584|gb|BC020630|ens|ENST00000375078|gb|AY204901	0.00002	down	21.4644
A_23_P4144	NM_025233	COASY	Coenzyme A synthase	ref|NM_025233|ref|NM_001042532|ref|NM_001042530|ref|NM_001042529	0.00234	down	21.4575
A_23_P128230	NM_002135	NR4A1	nuclear receptor subfamily 4, group A, member 1	ref|NM_002135|ref|NM_173157|gb|AK131566|ens|ENST00000345935	<0.00001	up	21.4457
A_23_P11685	NM_024420	PLA2G4A	phospholipase A2, group IVA (cytosolic, calcium-dependent)	ref|NM_024420|ens|ENST00000367466|gb|BC114340|gb|M68874	0.00002	up	21.4319
A_24_P271014	NM_005134	PPP4R1	protein phosphatase 4, regulatory subunit 1	ref|NM_005134|ref|NM_001042388|gb|AF200478|ens|ENST00000285124	0.00237	up	21.4286
A_23_P37127	NM_004496	FOXA1	forkhead box A1	ref|NM_004496|ens|ENST00000250448|gb|BC033890|thc|THC2463841	0.00672	down	21.4286
A_23_P208706	NM_138764	BAX	BCL2-associated X protein	ref|NM_138764|ref|NM_138761|ref|NM_138765|ref|NM_138763	<0.00001	down	21.4216
A_23_P208706	NM_138764	BAX	BCL2-associated X protein	ref|NM_138764|ref|NM_138761|ref|NM_138765|ref|NM_138763	<0.00001	down	21.4147
A_23_P31073	NM_005375	MYB	v-myb myeloblastosis viral oncogene homolog (avian)	ref|NM_005375|gb|AJ606319|gb|AJ606323|gb|AJ606324	0.00009	up	21.4013
A_23_P302914	NM_020972	ZFYVE28	zinc finger, FYVE domain containing 28	ref|NM_020972|gb|BC041866|ens|ENST00000290974|gb|AK126692	0.00117	down	21.3822
A_23_P11685	NM_024420	PLA2G4A	phospholipase A2, group IVA (cytosolic, calcium-dependent)	ref|NM_024420|ens|ENST00000367466|gb|BC114340|gb|M68874	0.00001	up	21.3811
A_24_P416997	NM_145641	APOL3	apolipoprotein L, 3	ref|NM_145641|ref|NM_145642|ref|NM_014349|ref|NM_030644	0.00026	down	21.3811
A_23_P254801	NM_002660	PLCG1	phospholipase C, gamma 1	ref|NM_002660|ref|NM_182811|ens|ENST00000244007|ens|ENST00000373271	0.00398	down	21.3802
A_32_P859499	AK094433	HCG22	HLA complex group 22	gb|AK094433|thc|THC2623046	0.00745	down	21.3759
A_32_P33937	NM_152734	C6orf89	chromosome 6 open reading frame 89	ref|NM_152734|ens|ENST00000355190|gb|AK001957|gb|BC050582	0.0073	down	21.3629
A_23_P120146	NM_004257	TGFBRAP1	transforming growth factor, beta receptor associated protein 1	ref|NM_004257|ens|ENST00000258449|gb|DQ891559|gb|AF022795	0.00039	down	21.3622
A_24_P932887	AK097227	SPOCD1	SPOC domain containing 1	gb|AK097227|gb|AK096192|ens|ENST00000319796|gb|AK095829	0.00251	up	21.3583
A_24_P165864	NM_014879	P2RY14	purinergic receptor P2Y, G-protein coupled, 14	ref|NM_014879|ref|NM_001081455|ens|ENST00000309170|gb|D13626	0.00515	down	21.3499
A_24_P925342	ENST00000374334	NA	NA	ens|ENST00000374334|gb|AB209275|gb|AL049274|thc|THC2501494	0.00224	down	21.3464
A_24_P312915	NM_033489	CDC2L1	cell division cycle 2-like 1 (PITSLRE proteins)	ref|NM_033489|ref|NM_033488|ref|NM_033486|ref|NM_033492	0.00172	down	21.3415
A_23_P11685	NM_024420	PLA2G4A	phospholipase A2, group IVA (cytosolic, calcium-dependent)	ref|NM_024420|ens|ENST00000367466|gb|BC114340|gb|M68874	0.00002	up	21.3408
A_32_P173385	ENST00000334683	NA	NA	ens|ENST00000334683|gb|XR_019013|gb|XR_015495|ref|XR_017343	0.00717	up	21.3328
A_24_P33607	XR_019386	NA	NA	gb|XR_019386|gb|XR_015387|ref|XR_017158|ref|XR_016234	0.00762	up	21.3295
A_23_P215534	NM_053043	RBM33	RNA binding motif protein 33	ref|NM_053043|ens|ENST00000307403|gb|AL137724|thc|THC2493138	<0.00001	down	21.326
A_23_P87150	NM_004811	LPXN	leupaxin	ref|NM_004811|ens|ENST00000263845|gb|AK223165|gb|BC007490	0.00036	down	21.3251
A_24_P76831	NM_000578	SLC11A1	solute carrier family 11 (proton-coupled divalent metal ion transporters), member 1	ref|NM_000578|gb|BC041787|gb|BC071165|ens|ENST00000233202	0.00276	up	21.3164
A_23_P136325	NM_133264	WIPF2	WAS/WASL interacting protein family, member 2	ref|NM_133264|gb|BC065551|ens|ENST00000323571|gb|AL834239	0.00119	down	21.3052
A_24_P942370	NM_003774	GALNT4	UDP-N-acetyl-alpha-D-galactosamine:polypeptide N-acetylgalactosaminyltransferase 4 (GalNAc-T4)	ref|NM_003774|gb|AK026438|gb|BC036390|gb|BX647258	0.00207	up	21.2963
A_23_P419868	AK092698	FLJ35379	similar to Alu subfamily J sequence contamination warning entry	gb|AK092698|gb|AX747676|gb|XM_001133227|ref|XM_001127400	0.00669	down	21.2951
A_24_P42446	NM_001015508	PURG	purine-rich element binding protein G	ref|NM_001015508|ens|ENST00000339382|gb|AY077841|thc|THC2476217	0.00446	down	21.2935
A_24_P59053	ENST00000390350	NA	NA	ens|ENST00000390350|gb|BC070387|gb|A25971|gb|X58814	0.00273	down	21.2906
A_24_P938572	AF387613	ZNF847P	zinc finger protein 847 pseudogene	gb|AF387613|thc|NP439739	0.00051	down	21.2799
A_24_P253827	NM_001282	AP2B1	adaptor-related protein complex 2, beta 1 subunit	ref|NM_001282|ref|NM_001030006|ens|ENST00000312678|ens|ENST00000262325	0.00541	down	21.2792
A_23_P1473	NM_005041	PRF1	perforin 1 (pore forming protein)	ref|NM_005041|ref|NM_001083116|ens|ENST00000318971|ens|ENST00000373209	0.00231	down	21.2624
A_32_P113682	ENST00000371534	NA	NA	ens|ENST00000371534|gb|AK025056|thc|THC2498078	0.00346	up	21.2598
A_23_P127117	S72869	CCDC6	coiled-coil domain containing 6	gb|S72869	<0.00001	up	21.2575
A_23_P329361	NM_153603	COG7	component of oligomeric golgi complex 7	ref|NM_153603|gb|AK130714|ens|ENST00000307149|ens|ENST00000381126	0.00046	down	21.2389
A_32_P59308	BC035260	NA	NA	gb|BC035260|thc|THC2609081	0.00477	down	21.2329
A_24_P381945	NM_002134	HMOX2	heme oxygenase (decycling) 2	ref|NM_002134|ens|ENST00000219700|gb|AK222629|gb|S34389	0.00031	down	21.2291
A_24_P209113	NM_030571	NDFIP1	Nedd4 family interacting protein 1	ref|NM_030571|ens|ENST00000253814|ens|ENST00000313129|gb|AK075495	0.00035	up	21.223
A_32_P143589	NM_020406	CD177	CD177 molecule	ref|NM_020406|gb|AK225226	0.00202	up	21.2201
A_23_P161076	NM_001767	CD2	CD2 molecule	ref|NM_001767|ens|ENST00000369478|gb|AX680070|gb|M16445	0.00531	down	21.2062
A_24_P35228	NM_024915	GRHL2	grainyhead-like 2 (Drosophila)	ref|NM_024915|ens|ENST00000251808|gb|AK023844|gb|BQ016380	0.00599	down	21.204
A_32_P28459	THC2622633	NA	NA	thc|THC2622633	0.00006	up	21.2038
A_23_P208706	NM_138764	BAX	BCL2-associated X protein	ref|NM_138764|ref|NM_138761|ref|NM_138765|ref|NM_138763	<0.00001	down	21.1996
A_23_P140648	NM_014608	CYFIP1	cytoplasmic FMR1 interacting protein 1	ref|NM_014608|ref|NM_001033028|gb|BC005097|ens|ENST00000313077	0.00637	up	21.1987
A_23_P370162	ENST00000321448	NA	NA	ens|ENST00000321448|gb|CR749605|gb|AK074152|gb|BC037294	0.00318	down	21.1955
A_24_P24053	ENST00000390632	NA	NA	ens|ENST00000390632|ens|ENST00000390627|gb|AF035042|gb|Z33902	0.00403	up	21.1861
A_24_P194881	NM_001080420	NA	NA	ref|NM_001080420|ens|ENST00000262795|gb|AB051437|gb|AK074038	0.00055	up	21.1814
A_24_P100684	ENST00000390615	NA	NA	ens|ENST00000390615|gb|L03822|gb|X99355|gb|DQ100833	0.00099	up	21.1794
A_32_P9737	A_32_P9737	NA	NA		0.00194	up	21.1791
A_23_P433758	NM_001030288	SPN	sialophorin	ref|NM_001030288|ref|NM_003123|gb|J04536|gb|X60502	0.00355	down	21.1747
A_32_P208178	NM_001006	RPS3A	ribosomal protein S3A	ref|NM_001006|ens|ENST00000274065|ens|ENST00000341090|ens|ENST00000338576	0.00785	up	21.17
A_24_P229389	NM_207495	NA	NA	ref|NM_207495|gb|BX640709|ens|ENST00000296850|gb|AK123663	0.00474	down	21.1684
A_23_P139682	NM_002864	PZP	pregnancy-zone protein	ref|NM_002864|ens|ENST00000261336|ens|ENST00000381997|gb|BC111756	0.00551	up	21.1679
A_23_P122052	NM_001008397	GPX8	glutathione peroxidase 8 (putative)	ref|NM_001008397|gb|AY358715|gb|BC029424|gb|AK074216	0.00841	down	21.1562
A_24_P6975	ENST00000313620	NA	NA	ens|ENST00000313620|ref|XM_938484	0.00316	up	21.1517
A_23_P212119	NM_054110	GALNTL2	UDP-N-acetyl-alpha-D-galactosamine:polypeptide N-acetylgalactosaminyltransferase-like 2	ref|NM_054110|ens|ENST00000339732|gb|AF361251|gb|AK094780	0.00067	up	21.1491
A_24_P188878	NM_033625	RPL34	ribosomal protein L34	ref|NM_033625|ref|NM_000995|ens|ENST00000359951|gb|CR542232	0.00406	up	21.1358
A_32_P30075	THC2689579	NA	NA	thc|THC2689579	0.0009	up	21.1356
A_32_P146815	BC062473	MGST1	microsomal glutathione S-transferase 1	gb|BC062473|thc|THC2611684	0.00164	up	21.1242
A_23_P328511	NM_001537	HSBP1	heat shock factor binding protein 1	ref|NM_001537|gb|AY320409|gb|BC007515|gb|AF068754	0.00174	up	21.1189
A_23_P104798	NM_001562	IL18	interleukin 18 (interferon-gamma-inducing factor)	ref|NM_001562|gb|AY266351|ens|ENST00000280357|gb|CR542001	0.00107	up	21.1133
A_23_P34307	NM_005482	PIGK	phosphatidylinositol glycan anchor biosynthesis, class K	ref|NM_005482|gb|BX648473|ens|ENST00000370812|ens|ENST00000370813	0.00451	up	21.1111
A_23_P205997	NM_031301	APH1B	anterior pharynx defective 1 homolog B (C. elegans)	ref|NM_031301|gb|AB197122|gb|AB189172|ens|ENST00000261879	0.00025	up	21.0873
A_24_P115932	NM_004778	GPR44	G protein-coupled receptor 44	ref|NM_004778|ens|ENST00000332539|gb|AB008535|gb|AF144308	0.00124	down	21.0789
A_23_P207957	NM_003574	VAPA	VAMP (vesicle-associated membrane protein)-associated protein A, 33kDa	ref|NM_003574|ref|NM_194434|ens|ENST00000340541|ens|ENST00000349843	0.00275	up	21.0654
A_24_P245379	NM_002575	SERPINB2	serpin peptidase inhibitor, clade B (ovalbumin), member 2	ref|NM_002575|ens|ENST00000299502|gb|DQ892867|gb|DQ896116	<0.00001	up	21.0392
A_23_P91814	NM_017875	SLC25A38	solute carrier family 25, member 38	ref|NM_017875|ens|ENST00000273158|gb|AK225388|gb|BC013194	0.00245	down	21.039
A_24_P634845	THC2748223	NA	NA	thc|THC2748223|thc|THC2667264	0.00108	down	21.0227
A_23_P208706	NM_138764	BAX	BCL2-associated X protein	ref|NM_138764|ref|NM_138761|ref|NM_138765|ref|NM_138763	<0.00001	down	21.021
A_23_P204048	NM_006482	DYRK2	dual-specificity tyrosine-(Y)-phosphorylation regulated kinase 2	ref|NM_006482|ref|NM_003583|ens|ENST00000319833|ens|ENST00000344096	0.00831	down	21.0164
A_24_P324563	NM_031213	FAM108A1	family with sequence similarity 108, member A1	ref|NM_031213|ref|NM_001080422|gb|BC035961|ens|ENST00000250974	0.00283	down	21.0153
A_24_P335263	NM_199040	NUDT4	nudix (nucleoside diphosphate linked moiety X)-type motif 4	ref|NM_199040|ref|NM_019094|gb|BC012069|gb|AB007956	0.00028	up	21.0098
A_23_P101272	NM_017908	ZNF446	zinc finger protein 446	ref|NM_017908|gb|AK026153|gb|AY279351|gb|BC017206	0.00397	down	20.9959
A_23_P77321	NM_015138	RTF1	Rtf1, Paf1/RNA polymerase II complex component, homolog (S. cerevisiae)	ref|NM_015138|ens|ENST00000389628|ens|ENST00000389629|ens|ENST00000260373	0.00152	down	20.9957
A_23_P208706	NM_138764	BAX	BCL2-associated X protein	ref|NM_138764|ref|NM_138761|ref|NM_138765|ref|NM_138763	<0.00001	down	20.9939
A_23_P164284	NM_001307	CLDN7	claudin 7	ref|NM_001307|ens|ENST00000360325|ens|ENST00000317838|gb|BT006829	0.00524	down	20.9909
A_23_P169470	NM_001261	CDK9	cyclin-dependent kinase 9	ref|NM_001261|ens|ENST00000373264|ens|ENST00000373265|gb|X80230	0.00276	down	20.9756
A_24_P918792	BF355106	NA	NA	gb|BF355106|gb|BQ338868	0.00756	down	20.9756
A_24_P323298	A_24_P323298	NA	NA		0.0043	up	20.9721
A_24_P46417	NM_005990	STK10	serine/threonine kinase 10	ref|NM_005990|gb|BC014413|ens|ENST00000176763|gb|AB015718	0.00077	down	20.9653
A_24_P394075	NM_001002006	NT5C1B	5'-nucleotidase, cytosolic IB	ref|NM_001002006|ref|NM_033253|gb|AK097422|ens|ENST00000304081	0.0033	up	20.952
A_23_P141946	NM_003573	LTBP4	latent transforming growth factor beta binding protein 4	ref|NM_003573|ref|NM_001042544|ref|NM_001042545|gb|AK074499	0.00677	down	20.9479
A_24_P200694	NM_002931	RING1	ring finger protein 1	ref|NM_002931|gb|BC002922|ens|ENST00000374656|ens|ENST00000383079	0.00307	down	20.9302
A_23_P82523	NM_000927	ABCB1	ATP-binding cassette, sub-family B (MDR/TAP), member 1	ref|NM_000927|gb|AF016535|ens|ENST00000265724|gb|AM393352	0.00109	down	20.9283
A_23_P104798	NM_001562	IL18	interleukin 18 (interferon-gamma-inducing factor)	ref|NM_001562|gb|AY266351|ens|ENST00000280357|gb|CR542001	0.00062	up	20.9231
A_32_P14178	AK125910	LPAL2	lipoprotein, Lp(a)-like 2	gb|AK125910|ens|ENST00000297289|thc|THC2562648|thc|THC2566606	0.00107	down	20.9222
A_23_P3215	AF168717	DTWD1	DTW domain containing 1	gb|AF168717	0.00757	up	20.9172
A_23_P104798	NM_001562	IL18	interleukin 18 (interferon-gamma-inducing factor)	ref|NM_001562|gb|AY266351|ens|ENST00000280357|gb|CR542001	0.00035	up	20.9162
A_32_P169179	NR_002307	MSX2P1	msh homeobox 2 pseudogene 1	ref|NR_002307|gb|BM559546|thc|THC2788485	0.00084	down	20.915
A_23_P311150	NM_138288	C14orf147	chromosome 14 open reading frame 147	ref|NM_138288|ens|ENST00000298130|gb|AK001993|gb|AL080066	0.00464	up	20.9132
A_23_P102832	NM_007186	CEP250	centrosomal protein 250kDa	ref|NM_007186|ref|NM_001035518|gb|AF022655|ens|ENST00000356095	0.00437	down	20.9068
A_23_P168828	NM_005655	KLF10	Kruppel-like factor 10	ref|NM_005655|ref|NM_001032282|ens|ENST00000285407|gb|BC011538	0.00158	up	20.9024
A_24_P59713	BC035659	HCP5P10	HLA complex P5 pseudogene 10	gb|BC035659|gb|BC035828|thc|THC2492318	0.00223	down	20.9002
A_23_P412962	NM_005149	TBX19	T-box 19	ref|NM_005149|ens|ENST00000367821|ens|ENST00000367828|gb|AK129813	0.00274	down	20.8967
A_23_P11685	NM_024420	PLA2G4A	phospholipase A2, group IVA (cytosolic, calcium-dependent)	ref|NM_024420|ens|ENST00000367466|gb|BC114340|gb|M68874	0.00003	up	20.8877
A_24_P117053	NM_024509	LRFN3	leucine rich repeat and fibronectin type III domain containing 3	ref|NM_024509|ens|ENST00000246529|gb|DQ893672|gb|DQ895825	0.00107	down	20.8817
A_24_P106728	NM_019042	PUS7	pseudouridylate synthase 7 homolog (S. cerevisiae)	ref|NM_019042|ens|ENST00000356362|gb|BC011396|gb|BC005209	0.0018	down	20.8811
A_32_P373557	AK124328	DTWD2	DTW domain containing 2	gb|AK124328|gb|BX648369	0.00026	down	20.8633
A_23_P40433	NM_058187	C21orf63	chromosome 21 open reading frame 63	ref|NM_058187|ens|ENST00000300255|ens|ENST00000382705|ens|ENST00000382699	0.00415	down	20.8597
A_23_P69958	NM_001284	NA	NA	ref|NM_001284|ens|ENST00000316788|gb|AK126876|gb|AK124911	<0.00001	up	20.8571
A_23_P169470	NM_001261	CDK9	cyclin-dependent kinase 9	ref|NM_001261|ens|ENST00000373264|ens|ENST00000373265|gb|X80230	0.0038	down	20.8556
A_23_P433820	NM_152658	THAP8	THAP domain containing 8	ref|NM_152658|ens|ENST00000292894|gb|AK057453|gb|AK093048	0.00634	down	20.8556
A_23_P353704	NM_019593	RP5-1022P6.2	hypothetical protein KIAA1434	ref|NM_019593|gb|BC027588|gb|AK001947|gb|AL049446	0.0008	up	20.854
A_23_P3215	AF168717	DTWD1	DTW domain containing 1	gb|AF168717	0.00793	up	20.8531
A_23_P122906	NM_015570	AUTS2	autism susceptibility candidate 2	ref|NM_015570|gb|BC064693|gb|AB007902|gb|AY211931	0.00421	down	20.8528
A_23_P106887	NM_004960	FUS	fusion (involved in t(12;16) in malignant liposarcoma)	ref|NM_004960|gb|X71428|ens|ENST00000254108|ens|ENST00000354711	0.00076	down	20.8487
A_23_P361654	BC073764	IGKC	immunoglobulin kappa constant	gb|BC073764|ens|ENST00000390273|ens|ENST00000390251|ens|ENST00000390276	0.00297	up	20.8411
A_23_P347198	NM_003111	SP3	Sp3 transcription factor	ref|NM_003111|ref|NM_001017371|gb|AY441957|gb|AY441958	0.00382	up	20.8333
A_32_P17163	ENST00000368149	NA	NA	ens|ENST00000368149|gb|AK002195|thc|THC2503560	0.00476	down	20.8304
A_23_P218237	NM_000229	LCAT	lecithin-cholesterol acyltransferase	ref|NM_000229|ens|ENST00000264005|gb|BT009748|gb|X06537	0.00461	down	20.8259
A_23_P121602	NM_003864	SAP30	Sin3A-associated protein, 30kDa	ref|NM_003864|ens|ENST00000296504|gb|AF055993|gb|BC016757	0.00593	up	20.8132
A_24_P183094	ENST00000310773	NA	NA	ens|ENST00000310773|gb|AJ306929|gb|Z24724|gb|BC106085	0.00337	up	20.8054
A_23_P143958	BC049823	NA	NA	gb|BC049823|gb|BC107708|ens|ENST00000382813|ens|ENST00000295830	0.00631	up	20.7792
A_23_P250485	NM_018207	TRIM62	tripartite motif-containing 62	ref|NM_018207|ens|ENST00000291416|gb|AK001621|gb|AX775831	0.00255	down	20.777
A_23_P252403	NM_016144	COMMD10	COMM domain containing 10	ref|NM_016144|ens|ENST00000274458|gb|AK002147|gb|BC005179	0.00297	up	20.7746
A_23_P62220	NM_000074	CD40LG	CD40 ligand	ref|NM_000074|ens|ENST00000370629|gb|AF529195|gb|X96710	0.00105	down	20.7566
A_32_P15838	THC2723388	NA	NA	thc|THC2723388	0.0033	down	20.7537
A_23_P52430	NM_003393	WNT8B	wingless-type MMTV integration site family, member 8B	ref|NM_003393|ens|ENST00000343737|gb|AB073637|gb|Y11094	0.0053	up	20.743
A_32_P877	BM999343	RAB31	RAB31, member RAS oncogene family	gb|BM999343|gb|CA418290|gb|CA447872|gb|CB243258	0.00001	up	20.7412
A_32_P221305	BC073935	LOC389634	hypothetical LOC389634	gb|BC073935|thc|THC2545092|thc|THC2576067|thc|THC2503553	0.00202	up	20.7309
A_23_P140427	NM_016337	EVL	Enah/Vasp-like	ref|NM_016337|gb|BC023997|ens|ENST00000355449|gb|AK091634	0.00265	down	20.7217
A_23_P77502	NM_001009944	PKD1	polycystic kidney disease 1 (autosomal dominant)	ref|NM_001009944|ref|NM_000296|gb|L33243|ens|ENST00000262304	0.00365	down	20.6972
A_24_P133253	NM_000899	KITLG	KIT ligand	ref|NM_000899|ref|NM_003994|gb|CR749222|ens|ENST00000228280	0.00133	down	20.6938
A_23_P122863	NM_001001555	GRB10	growth factor receptor-bound protein 10	ref|NM_001001555|ref|NM_001001550|ref|NM_005311|ref|NM_001001549	0.00379	up	20.6906
A_23_P429581	NM_153704	TMEM67	transmembrane protein 67	ref|NM_153704|gb|BX648768|ens|ENST00000356610|ens|ENST00000323130	0.00704	down	20.677
A_32_P468522	ENST00000383285	NA	NA	ens|ENST00000383285|ens|ENST00000383476|ens|ENST00000376072|ens|ENST00000376071	0.00547	down	20.6633
A_24_P841795	AK026403	NA	NA	gb|AK026403|thc|THC2624861	0.00394	down	20.6522
A_23_P45488	NM_021806	FAM3A	family with sequence similarity 3, member A	ref|NM_021806|gb|BC002934|ens|ENST00000322269|ens|ENST00000369643	0.00022	down	20.6406
A_24_P417036	NM_005036	PPARA	peroxisome proliferator-activated receptor alpha	ref|NM_005036|ref|NM_001001928|gb|BC071932|ens|ENST00000262735	0.00732	down	20.6307
A_24_P190472	NM_003064	SLPI	secretory leukocyte peptidase inhibitor	ref|NM_003064|ens|ENST00000338380|gb|AF114471|gb|DQ891365	0.00076	up	20.621
A_24_P85400	BC030525	NA	NA	gb|BC030525|thc|THC2489408	0.00418	down	20.6208
A_23_P48056	NM_006825	CKAP4	cytoskeleton-associated protein 4	ref|NM_006825|gb|BC094824|gb|AK123693|ens|ENST00000308387	0.00082	up	20.6166
A_23_P330616	NM_003387	WIPF1	WAS/WASL interacting protein family, member 1	ref|NM_003387|ref|NM_001077269|gb|BX640870|ens|ENST00000359761	0.00001	down	20.6158
A_24_P129632	NM_004747	DLG5	discs, large homolog 5 (Drosophila)	ref|NM_004747|gb|AB011155|ens|ENST00000372391|ens|ENST00000372392	0.00093	down	20.6145
A_23_P86171	NM_004474	FOXD2	forkhead box D2	ref|NM_004474|ens|ENST00000371866|ens|ENST00000334793|thc|THC2480256	0.00755	down	20.6144
A_23_P18017	NM_001870	CPA3	carboxypeptidase A3 (mast cell)	ref|NM_001870|ens|ENST00000296046|gb|M27717|gb|BC012613	0.00355	up	20.6067
A_23_P155335	NM_002662	PLD1	phospholipase D1, phosphatidylcholine-specific	ref|NM_002662|ens|ENST00000351298|gb|U38545|gb|BX648900	0.00059	up	20.5996
A_23_P254079	NM_003943	STBD1	starch binding domain 1	ref|NM_003943|ens|ENST00000237642|gb|AK123795|gb|AK092277	0.00084	up	20.5991
A_23_P212749	NM_002111	HTT	huntingtin	ref|NM_002111|ens|ENST00000355072|gb|AB016794|gb|L20431	0.00799	down	20.5973
A_24_P92952	NM_006015	ARID1A	AT rich interactive domain 1A (SWI-like)	ref|NM_006015|ref|NM_139135|gb|AF268913|gb|AF521670	0.00037	down	20.5767
A_24_P550924	AK056150	LOC149478	hypothetical protein LOC149478	gb|AK056150|gb|BG766202|thc|THC2519619	0.00199	down	20.5714
A_23_P334414	NM_025228	TRAF3IP3	TRAF3 interacting protein 3	ref|NM_025228|gb|AK122792|ens|ENST00000010338|ens|ENST00000367024	<0.00001	down	20.5575
A_23_P405885	NM_138815	DPPA2	developmental pluripotency associated 2	ref|NM_138815|gb|BC018070|ens|ENST00000295771|gb|AY283672	0.00175	down	20.5556
A_23_P98159	NM_139075	TPCN2	two pore segment channel 2	ref|NM_139075|ens|ENST00000294309|ens|ENST00000356782|gb|AK023366	0.00399	up	20.5556
A_23_P121622	D89479	SULT1B1	sulfotransferase family, cytosolic, 1B, member 1	gb|D89479	0.00009	up	20.5535
A_24_P925505	S67044	CD36	CD36 molecule (thrombospondin receptor)	gb|S67044	0.0001	up	20.5488
A_32_P41604	NM_000130	F5	coagulation factor V (proaccelerin, labile factor)	ref|NM_000130|thc|THC2654286	0.00013	up	20.5363
A_24_P765053	DA438590	NA	NA	gb|DA438590|gb|BG944474|thc|THC2556111|gb|BE898777	0.00256	down	20.5348
A_32_P99019	NM_152578	FMR1NB	fragile X mental retardation 1 neighbor	ref|NM_152578|ens|ENST00000370467|ens|ENST00000370465|gb|AK098602	0.00177	down	20.5273
A_32_P232704	AL832861	MTERF	mitochondrial transcription termination factor	gb|AL832861|thc|THC2496633	0.00216	down	20.4955
A_23_P341418	AK098818	ZDHHC20	zinc finger, DHHC-type containing 20	gb|AK098818|gb|AK090979|gb|AL833626|gb|BC036691	0.00146	up	20.4861
A_32_P460399	AL365520	NA	NA	gb|AL365520|gb|AL365522|thc|THC2607791	0.00712	down	20.4827
A_32_P55414	THC2529512	NA	NA	thc|THC2529512	0.00467	down	20.4768
A_23_P128470	NM_138337	CLEC12A	C-type lectin domain family 12, member A	ref|NM_138337|ref|NM_201623|gb|BC063424|gb|AY547296	0.00184	up	20.4736
A_24_P50567	A_24_P50567	NA	NA		0.00076	up	20.471
A_24_P221235	XR_018337	NA	NA	gb|XR_018337|gb|BQ428696|ref|XM_001131129|ref|XM_001125970	0.00182	down	20.4646
A_23_P128887	NM_182910	SYNE2	spectrin repeat containing, nuclear envelope 2	ref|NM_182910|ref|NM_182914|ref|NM_015180|ref|NM_182913	0.00055	down	20.4638
A_23_P82523	NM_000927	ABCB1	ATP-binding cassette, sub-family B (MDR/TAP), member 1	ref|NM_000927|gb|AF016535|ens|ENST00000265724|gb|AM393352	0.00039	down	20.4637
A_23_P41487	NM_015130	TBC1D9	TBC1 domain family, member 9 (with GRAM domain)	ref|NM_015130|gb|AB020689|gb|AK127020|gb|BC038804	0.00232	up	20.4525
A_23_P121716	NM_005139	ANXA3	annexin A3	ref|NM_005139|ens|ENST00000264908|ens|ENST00000380662|gb|CR407648	0.0011	up	20.4485
A_23_P114656	NM_004964	HDAC1	histone deacetylase 1	ref|NM_004964|ens|ENST00000373548|ens|ENST00000373541|gb|D50405	0.00022	down	20.4482
A_24_P256404	AK093202	LOC440570	LOC440570	gb|AK093202|gb|AX747988	0.00508	down	20.4422
A_23_P112957	A_23_P112957	NA	NA		0.00471	up	20.4397
A_24_P270728	NM_012385	NUPR1	nuclear protein 1	ref|NM_012385|ref|NM_001042483|ens|ENST00000324873|gb|AF135266	0.00561	up	20.4384
A_24_P722248	A_24_P722248	NA	NA		0.00012	down	20.4334
A_23_P144317	A_23_P144317	NA	NA		0.00689	down	20.4244
A_23_P27677	NM_001571	IRF3	interferon regulatory factor 3	ref|NM_001571|gb|BC071721|ens|ENST00000309877|ens|ENST00000377135	0.00578	down	20.4204
A_23_P350059	NR_003242	C1orf152	chromosome 1 open reading frame 152	ref|NR_003242|gb|BC063642|gb|AF345651|gb|XM_001134421	0.00634	down	20.4103
A_23_P93787	NM_001010931	HGF	hepatocyte growth factor (hepapoietin A; scatter factor)	ref|NM_001010931|ens|ENST00000354224|gb|BC105797|gb|X57574	0.002	up	20.3932
A_24_P163574	NM_022574	GIGYF1	GRB10 interacting GYF protein 1	ref|NM_022574|gb|AY176044|ens|ENST00000275732|ens|ENST00000336975	0.00132	down	20.388
A_32_P66974	NM_004716	PCSK7	proprotein convertase subtilisin/kexin type 7	ref|NM_004716|gb|BC006357|ens|ENST00000320934|ens|ENST00000359386	0.00403	down	20.3872
A_23_P209167	NM_005860	FSTL3	follistatin-like 3 (secreted glycoprotein)	ref|NM_005860|ens|ENST00000166139|gb|AY358917|gb|U76702	0.00007	up	20.3831
A_23_P104798	NM_001562	IL18	interleukin 18 (interferon-gamma-inducing factor)	ref|NM_001562|gb|AY266351|ens|ENST00000280357|gb|CR542001	0.0006	up	20.3828
A_24_P392231	AW302767	NA	NA	gb|AW302767|ref|XR_017387|ref|XR_018021|ref|XR_018538	0.00461	up	20.3779
A_23_P104798	NM_001562	IL18	interleukin 18 (interferon-gamma-inducing factor)	ref|NM_001562|gb|AY266351|ens|ENST00000280357|gb|CR542001	0.00023	up	20.3675
A_23_P254801	NM_002660	PLCG1	phospholipase C, gamma 1	ref|NM_002660|ref|NM_182811|ens|ENST00000244007|ens|ENST00000373271	0.00553	down	20.3548
A_32_P191551	THC2664489	NA	NA	thc|THC2664489	0.00153	up	20.3529
A_24_P315564	XM_001130995	NA	NA	ref|XM_001130995|ref|XM_001129707|ref|XM_001133691|ref|XM_001129989	0.00075	down	20.3482
A_32_P43826	AL832540	LOC441666	zinc finger protein 91 pseudogene	gb|AL832540|gb|BX537675|gb|XR_016118|gb|XR_015683	0.00317	up	20.3422
A_23_P26810	NM_000546	TP53	tumor protein p53	ref|NM_000546|gb|BC003596|gb|DQ186648|gb|DQ186649	0.00007	down	20.332
A_24_P42140	A_24_P42140	NA	NA		0.0045	up	20.3301
A_23_P45108	NM_017730	QRICH1	glutamine-rich 1	ref|NM_017730|ref|NM_198880|gb|BC110855|ens|ENST00000357496	0.00199	down	20.3252
A_23_P200507	NM_014184	CNIH4	cornichon homolog 4 (Drosophila)	ref|NM_014184|gb|AL136930|gb|BC000573|gb|AF161512	0.00002	up	20.3215
A_24_P89891	NM_005658	TRAF1	TNF receptor-associated factor 1	ref|NM_005658|ens|ENST00000373887|gb|AK090468|gb|AL832989	0.00372	down	20.3139
A_23_P50775	NM_024509	LRFN3	leucine rich repeat and fibronectin type III domain containing 3	ref|NM_024509|ens|ENST00000246529|gb|AK172754|gb|BC003578	0.00019	down	20.3046
A_24_P305960	NM_181336	LEMD2	LEM domain containing 2	ref|NM_181336|gb|BC039864|ens|ENST00000293760|ens|ENST00000374196	0.00708	down	20.2941
A_24_P940633	AU148296	NA	NA	gb|AU148296	0.00742	down	20.2884
A_32_P352358	NM_001040066	NA	NA	ref|NM_001040066|ref|NM_001040071|ens|ENST00000318406|ens|ENST00000357683	0.00597	down	20.2793
A_23_P21560	NM_030797	FAM49A	family with sequence similarity 49, member A	ref|NM_030797|gb|AM393038|gb|AM393777|gb|CR533504	0.00039	up	20.2703
A_23_P135184	NM_006266	RALGDS	ral guanine nucleotide dissociation stimulator	ref|NM_006266|ref|NM_001042368|gb|BC059362|gb|AK074114	0.00394	down	20.2607
A_23_P130470	NM_021089	ZNF8	zinc finger protein 8	ref|NM_021089|ens|ENST00000196548|gb|M29581|gb|BC039323	0.00059	down	20.2548
A_23_P129786	NM_001005291	SREBF1	sterol regulatory element binding transcription factor 1	ref|NM_001005291|ref|NM_004176|ens|ENST00000355815|ens|ENST00000261646	0.00383	down	20.2532
A_24_P937062	A_24_P937062	NA	NA		0.00099	up	20.2435
A_24_P517918	ENST00000390596	NA	NA	ens|ENST00000390596|ens|ENST00000390629|ens|ENST00000390630|ens|ENST00000390612	0.00045	up	20.2405
A_23_P414269	NM_058163	TSR2	TSR2, 20S rRNA accumulation, homolog (S. cerevisiae)	ref|NM_058163|ens|ENST00000375151|gb|BC007699|gb|BC011825	0.00362	down	20.2381
A_24_P352952	NM_017565	FAM20A	family with sequence similarity 20, member A	ref|NM_017565|gb|AF447872|ens|ENST00000226094|ens|ENST00000375556	0.00276	up	20.2302
A_23_P200815	THC2501618	NA	NA	thc|THC2501618|thc|THC2534745	0.00013	up	20.2247
A_23_P11685	NM_024420	PLA2G4A	phospholipase A2, group IVA (cytosolic, calcium-dependent)	ref|NM_024420|ens|ENST00000367466|gb|BC114340|gb|M68874	0.00001	up	20.2183
A_24_P380061	NM_031305	ARHGAP24	Rho GTPase activating protein 24	ref|NM_031305|ref|NM_001025616|ref|NM_001042669|ens|ENST00000264343	<0.00001	up	20.214
A_32_P214020	AK124256	LOC100130155	hypothetical protein LOC100130155	gb|AK124256|gb|BX537900|gb|BC040180|gb|BX537518	0.00849	down	20.2109
A_23_P26713	NM_000978	RPL23	ribosomal protein L23	ref|NM_000978|gb|BC034378|ens|ENST00000245857|ens|ENST00000378096	0.00414	up	20.2012
A_23_P98085	NM_000314	PTEN	phosphatase and tensin homolog	ref|NM_000314|ens|ENST00000371953|gb|U92436|gb|BC038293	0.00083	up	20.1987
A_32_P111639	NM_031422	CHST9	carbohydrate (N-acetylgalactosamine 4-0) sulfotransferase 9	ref|NM_031422|gb|BC025764|gb|AY358488|ens|ENST00000284224	0.00129	down	20.1935
A_23_P21234	BM725480	SLC41A3	solute carrier family 41, member 3	gb|BM725480|gb|W79047|gb|H78541|gb|AA496314	0.00331	down	20.1923
A_24_P860662	ENST00000390610	NA	NA	ens|ENST00000390610|ens|ENST00000390622|ens|ENST00000390599|ens|ENST00000390633	0.00134	up	20.1914
A_23_P132138	AY039244	C21orf58	chromosome 21 open reading frame 58	gb|AY039244|gb|BC028934|thc|THC2489968|thc|THC2504510	0.00675	down	20.1849
A_24_P196562	NM_021603	FXYD2	FXYD domain containing ion transport regulator 2	ref|NM_021603|ref|NM_001680|gb|AK096069|ens|ENST00000260287	0.00147	up	20.1835
A_24_P222165	AK074381	GAB1	GRB2-associated binding protein 1	gb|AK074381|thc|THC2478022	0.00277	up	20.1754
A_24_P463517	BE143376	LYRM7	Lyrm7 homolog (mouse)	gb|BE143376	0.00607	down	20.1726
A_32_P143803	A_32_P143803	NA	NA		0.00196	down	20.17
A_23_P306804	NM_133467	CITED4	Cbp/p300-interacting transactivator, with Glu/Asp-rich carboxy-terminal domain, 4	ref|NM_133467|ens|ENST00000323860|ens|ENST00000372638|gb|BC035496	0.00038	up	20.1665
A_23_P75391	NM_020901	PHRF1	PHD and ring finger domains 1	ref|NM_020901|ens|ENST00000264555|gb|BC127876|gb|BC029651	0.00224	down	20.1613
A_32_P19716	NM_001080470	ZNF697	zinc finger protein 697	ref|NM_001080470|gb|AK027019|gb|BC063670|ref|XM_939547	0.00409	up	20.1525
A_24_P123166	NM_022171	TCTA	T-cell leukemia translocation altered gene	ref|NM_022171|ens|ENST00000273590|gb|CR457411|gb|BC005157	0.00006	up	20.1439
A_32_P171313	NM_021629	GNB4	guanine nucleotide binding protein (G protein), beta polypeptide 4	ref|NM_021629|gb|AK091332|gb|AX746918|thc|THC2529867	0.00056	up	20.1377
A_24_P216421	NM_033148	DTNB	dystrobrevin, beta	ref|NM_033148|ref|NM_183361|ref|NM_033147|ref|NM_183360	<0.00001	down	20.1175
A_23_P131337	NM_014140	SMARCAL1	SWI/SNF related, matrix associated, actin dependent regulator of chromatin, subfamily a-like 1	ref|NM_014140|ens|ENST00000357276|ens|ENST00000358207|gb|AK023780	0.00034	down	20.1149
A_23_P119617	NM_172231	SF4	splicing factor 4	ref|NM_172231|gb|AY072916|gb|AY072917|ens|ENST00000247001	0.00528	down	20.1149
A_32_P230828	NR_002578	GAS5	growth arrest-specific 5 (non-protein coding)	ref|NR_002578|gb|BC003075|gb|AL110141|gb|BC070486	0.00231	up	20.1146
A_23_P143857	NM_052953	LRRC3B	leucine rich repeat containing 3B	ref|NM_052953|ens|ENST00000326416|gb|BC040656|gb|AY358282	0.0041	down	20.1093
A_24_P224727	NM_004364	CEBPA	CCAAT/enhancer binding protein (C/EBP), alpha	ref|NM_004364|gb|BC063874|gb|Y11525|gb|X87248	0.00377	up	20.0917
A_23_P93787	NM_001010931	HGF	hepatocyte growth factor (hepapoietin A; scatter factor)	ref|NM_001010931|ens|ENST00000354224|gb|BC105797|gb|X57574	0.0069	up	20.0856
A_24_P104119	NM_019034	RHOF	ras homolog gene family, member F (in filopodia)	ref|NM_019034|ens|ENST00000267205|gb|AK000254|thc|THC2462403	0.00083	down	20.0794
A_23_P154500	NM_175629	DNMT3A	DNA (cytosine-5-)-methyltransferase 3 alpha	ref|NM_175629|ref|NM_022552|ref|NM_153759|gb|BC043617	0.00005	down	20.0758
A_23_P114947	NM_002923	RGS2	regulator of G-protein signaling 2, 24kDa	ref|NM_002923|gb|BC042755|ens|ENST00000235382|gb|L13463	0.00032	up	20.0703
A_24_P531312	THC2555689	NA	NA	thc|THC2555689|gb|AA515157|gb|AA004907|gb|AA677377	0.00105	down	20.0675
A_24_P155617	NM_172370	DAOA	D-amino acid oxidase activator	ref|NM_172370|gb|AY223901|gb|AY170470|gb|AY170469	0.00344	down	20.0658
A_24_P122940	THC2537289	NA	NA	thc|THC2537289	0.0062	down	20.0644
A_24_P400760	XR_016772	NA	NA	gb|XR_016772|ref|XM_001129085	0.00275	up	20.0514
A_23_P101308	ENST00000221462	NA	NA	ens|ENST00000221462|gb|BC039061|gb|BQ940559|thc|THC2474718	0.00657	down	20.0514
A_23_P7229	NM_033625	RPL34	ribosomal protein L34	ref|NM_033625|ref|NM_000995|ens|ENST00000359951|ens|ENST00000313620	0.00314	up	20.0496
A_23_P94063	AY260738	ZKSCAN1	zinc finger with KRAB and SCAN domains 1	gb|AY260738	0.00448	down	20.0413
A_23_P119222	NM_020415	RETN	resistin	ref|NM_020415|ens|ENST00000221515|gb|BC069302|gb|BC101560	0.00092	up	20.0308
A_23_P250164	NM_000187	HGD	homogentisate 1,2-dioxygenase (homogentisate oxidase)	ref|NM_000187|gb|BC020792|ens|ENST00000283871|gb|AK124291	0.00292	down	20.0307
A_23_P160582	NM_031207	HYI	hydroxypyruvate isomerase homolog (E. coli)	ref|NM_031207|gb|AK096244|gb|AY037165|gb|BC019041	0.00338	up	20.0156
A_23_P347777	NM_001040274	SYCP2L	synaptonemal complex protein 2-like	ref|NM_001040274|ens|ENST00000341041|ens|ENST00000283141|gb|AK128130	0.00763	down	20.0106
A_32_P225135	BC034233	NA	NA	gb|BC034233|thc|THC2608956	0.00498	down	20.0061
A_24_P285880	NM_003262	SEC62	SEC62 homolog (S. cerevisiae)	ref|NM_003262|ens|ENST00000337002|gb|AK025548|gb|BX648539	0.00057	up	20
A_32_P197060	AF086124	NA	NA	gb|AF086124|gb|BC035417|gb|BC050400|thc|THC2603339	0.00326	down	20
A_32_P213692	ENST00000216468	NA	NA	ens|ENST00000216468|gb|AK025695|gb|AK026855|gb|AK095650	0.00491	up	20
A_23_P75921	NM_145803	TRAF6	TNF receptor-associated factor 6	ref|NM_145803|ref|NM_004620|ens|ENST00000313105|ens|ENST00000348124	0.00506	down	20
A_24_P315854	ENST00000390630	NA	NA	ens|ENST00000390630|ens|ENST00000390629|ens|ENST00000390616|ens|ENST00000390596	0.00047	up	19.9972
A_23_P139066	NM_016422	RNF141	ring finger protein 141	ref|NM_016422|ens|ENST00000265981|gb|AF214680|gb|BC018104	<0.00001	up	19.9753
A_23_P34018	NM_001000	RPL39	ribosomal protein L39	ref|NM_001000|ens|ENST00000361575|ens|ENST00000273411|gb|AK098280	0.0071	up	19.9696
A_23_P124522	NM_024819	DCAKD	dephospho-CoA kinase domain containing	ref|NM_024819|ens|ENST00000342350|gb|BC018132|gb|BC033299	0.00375	down	19.9667
A_23_P98085	NM_000314	PTEN	phosphatase and tensin homolog	ref|NM_000314|ens|ENST00000371953|gb|U92436|gb|BC038293	0.00086	up	19.9588
A_23_P317200	NM_153340	ATXN7L2	ataxin 7-like 2	ref|NM_153340|gb|BC036849|ens|ENST00000369870|ens|ENST00000294668	0.00378	down	19.958
A_24_P636441	AK022223	NA	NA	gb|AK022223|thc|THC2504001|thc|THC2540510	0.00139	down	19.9402
A_23_P203629	NM_173042	IL18BP	interleukin 18 binding protein	ref|NM_173042|ref|NM_001039659|ref|NM_001039660|gb|BC044215	0.0071	down	19.9291
A_23_P342825	NM_022039	FBXW4	F-box and WD repeat domain containing 4	ref|NM_022039|ens|ENST00000331272|gb|AK056917|gb|AK123173	0.00281	down	19.9248
A_23_P208706	NM_138764	BAX	BCL2-associated X protein	ref|NM_138764|ref|NM_138761|ref|NM_138765|ref|NM_138763	<0.00001	down	19.9199
A_23_P392486	NM_177531	PKHD1L1	polycystic kidney and hepatic disease 1 (autosomal recessive)-like 1	ref|NM_177531|ens|ENST00000378402|gb|AK131338|gb|AY219181	0.00685	up	19.9197
A_24_P117672	NM_021228	SCAF1	SR-related CTD-associated factor 1	ref|NM_021228|ens|ENST00000360565|ens|ENST00000342211|gb|AK024444	0.0017	down	19.9115
A_23_P258944	NM_012328	DNAJB9	DnaJ (Hsp40) homolog, subfamily B, member 9	ref|NM_012328|gb|BC028912|ens|ENST00000249356|gb|AY359045	0.00471	up	19.9111
A_24_P935967	A_24_P935967	NA	NA		0.00839	down	19.9067
A_23_P206371	NM_003946	NOL3	nucleolar protein 3 (apoptosis repressor with CARD domain)	ref|NM_003946|gb|AF064599|ens|ENST00000268605|gb|BC012798	0.00139	up	19.899
A_24_P414169	BC040991	TFDP2	transcription factor Dp-2 (E2F dimerization partner 2)	gb|BC040991|thc|THC2492813|thc|THC2540106	0.00617	down	19.8915
A_23_P110062	NM_003907	EIF2B5	eukaryotic translation initiation factor 2B, subunit 5 epsilon, 82kDa	ref|NM_003907|ens|ENST00000273783|gb|DQ891483|gb|DQ894670	0.00279	down	19.8758
A_24_P236949	NM_018381	C19orf66	chromosome 19 open reading frame 66	ref|NM_018381|gb|BC035817|gb|AK096142|gb|BC026180	0.00262	down	19.8675
A_23_P65629	NM_021161	KCNK10	potassium channel, subfamily K, member 10	ref|NM_021161|ref|NM_138317|ref|NM_138318|ens|ENST00000340700	0.00342	down	19.861
A_24_P139620	NM_001014443	USP21	ubiquitin specific peptidase 21	ref|NM_001014443|ref|NM_012475|gb|AF217979|gb|AF233442	0.00469	down	19.8582
A_23_P163380	NM_006441	MTHFS	5,10-methenyltetrahydrofolate synthetase (5-formyltetrahydrofolate cyclo-ligase)	ref|NM_006441|gb|BC037852|ens|ENST00000258874|gb|AK054972	0.00045	up	19.845
A_23_P164022	NM_033375	MYO1C	myosin IC	ref|NM_033375|ref|NM_001080779|ref|NM_001080950|ens|ENST00000361007	0.00539	down	19.8433
A_24_P419309	NM_004814	SNRNP40	small nuclear ribonucleoprotein 40kDa (U5)	ref|NM_004814|gb|AL157420|ens|ENST00000263694|ens|ENST00000373720	0.00424	down	19.843
A_23_P126735	NM_000572	IL10	interleukin 10	ref|NM_000572|ens|ENST00000367099|gb|M57627|gb|BC022315	0.0043	up	19.8151
A_23_P39034	NM_003072	SMARCA4	SWI/SNF related, matrix associated, actin dependent regulator of chromatin, subfamily a, member 4	ref|NM_003072|ens|ENST00000344626|ens|ENST00000358026|ens|ENST00000324954	0.00657	down	19.8084
A_23_P11685	NM_024420	PLA2G4A	phospholipase A2, group IVA (cytosolic, calcium-dependent)	ref|NM_024420|ens|ENST00000367466|gb|BC114340|gb|M68874	0.00003	up	19.7982
A_24_P338992	NM_025083	EDC3	enhancer of mRNA decapping 3 homolog (S. cerevisiae)	ref|NM_025083|ens|ENST00000315127|gb|BC011534|gb|AL133447	0.00343	down	19.7952
A_23_P26154	NM_002666	PLIN	perilipin	ref|NM_002666|ens|ENST00000300055|gb|AB005293|gb|BC031084	0.00795	down	19.7898
A_24_P373312	NM_173164	NFATC3	nuclear factor of activated T-cells, cytoplasmic, calcineurin-dependent 3	ref|NM_173164|ref|NM_173165|ref|NM_173163|ref|NM_004555	0.00033	down	19.7892
A_23_P368154	NM_153703	PODN	podocan	ref|NM_153703|gb|BC030608|gb|AY358294|ens|ENST00000312553	0.00684	down	19.7802
A_23_P98085	NM_000314	PTEN	phosphatase and tensin homolog	ref|NM_000314|ens|ENST00000371953|gb|U92436|gb|BC038293	0.00052	up	19.7769
A_24_P127235	NM_021574	BCR	breakpoint cluster region	ref|NM_021574|ref|NM_004327|ens|ENST00000305877|ens|ENST00000359540	0.00226	down	19.7725
A_23_P165657	NM_005415	SLC20A1	solute carrier family 20 (phosphate transporter), member 1	ref|NM_005415|ens|ENST00000272542|gb|AK123420|gb|L20859	<0.00001	down	19.7645
A_24_P382253	NM_018170	RPRD1A	regulation of nuclear pre-mRNA domain containing 1A	ref|NM_018170|gb|BC000225|ens|ENST00000357384|ens|ENST00000337059	0.00201	up	19.7605
A_32_P190864	THC2718727	NA	NA	thc|THC2718727	0.00258	up	19.7582
A_23_P388900	NM_018420	SLC22A15	solute carrier family 22, member 15	ref|NM_018420|gb|BC026358|ens|ENST00000369503|gb|AK125072	0.00404	up	19.7575
A_23_P150549	NM_014224	PGA3	pepsinogen 3, group I (pepsinogen A)	ref|NM_014224|ref|NM_001079807|ref|NM_001079808|gb|BC029055	0.00214	up	19.7508
A_24_P305993	NM_181645	CCDC67	coiled-coil domain containing 67	ref|NM_181645|ens|ENST00000354243|ens|ENST00000298050|gb|BC017929	0.00464	down	19.7507
A_23_P92954	NM_000414	HSD17B4	hydroxysteroid (17-beta) dehydrogenase 4	ref|NM_000414|ens|ENST00000256216|gb|DQ891866|gb|DQ895055	0.00119	up	19.7505
A_23_P6762	NM_032492	JAGN1	jagunal homolog 1 (Drosophila)	ref|NM_032492|ens|ENST00000307768|ens|ENST00000383816|ens|ENST00000333906	0.0064	down	19.7498
A_23_P95330	NM_016032	ZDHHC9	zinc finger, DHHC-type containing 9	ref|NM_016032|ref|NM_001008222|ens|ENST00000371064|ens|ENST00000357166	0.00449	up	19.7434
A_23_P364355	ENST00000390361	NA	NA	ens|ENST00000390361|ens|ENST00000390359|gb|X58329|gb|X74843	0.00282	down	19.7417
A_32_P58074	NM_001006	RPS3A	ribosomal protein S3A	ref|NM_001006|ens|ENST00000274065|ens|ENST00000341090|ens|ENST00000382175	0.0045	up	19.7403
A_23_P88817	NM_012213	MLYCD	malonyl-CoA decarboxylase	ref|NM_012213|gb|BC052592|ens|ENST00000262430|gb|AF090834	0.00018	down	19.715
A_24_P563745	AK025887	SLC2A9	solute carrier family 2 (facilitated glucose transporter), member 9	gb|AK025887|gb|BX111149|thc|THC2620494	0.00136	up	19.7136
A_23_P114656	NM_004964	HDAC1	histone deacetylase 1	ref|NM_004964|ens|ENST00000373548|ens|ENST00000373541|gb|D50405	0.00088	down	19.7059
A_23_P218770	NM_002872	RAC2	ras-related C3 botulinum toxin substrate 2 (rho family, small GTP binding protein Rac2)	ref|NM_002872|ens|ENST00000249071|gb|BC018735|gb|AF077208	0.0035	down	19.697
A_24_P59430	NM_182495	FAM55B	family with sequence similarity 55, member B	ref|NM_182495|gb|AK057953|thc|THC2486973	0.00733	down	19.6863
A_23_P200477	AB043587	ACBD3	acyl-Coenzyme A binding domain containing 3	gb|AB043587	0.00833	up	19.6809
A_24_P234094	NM_003929	RAB7L1	RAB7, member RAS oncogene family-like 1	ref|NM_003929|ens|ENST00000235932|gb|D84488|thc|THC2653105	0.0001	down	19.6532
A_24_P240487	NM_000301	PLG	plasminogen	ref|NM_000301|ens|ENST00000308192|gb|M74220|gb|K02922	0.0049	down	19.6483
A_32_P718498	NM_005937	MLLT6	myeloid/lymphoid or mixed-lineage leukemia (trithorax homolog, Drosophila); translocated to, 6	ref|NM_005937|gb|AB209633|ens|ENST00000325718|ens|ENST00000358312	0.00726	down	19.646
A_32_P184039	A_32_P184039	NA	NA		0.00137	down	19.6389
A_23_P89460	NM_012138	AATF	apoptosis antagonizing transcription factor	ref|NM_012138|ens|ENST00000389309|ens|ENST00000389310|ens|ENST00000225402	0.00006	down	19.6364
A_23_P135494	NM_013943	CLIC4	chloride intracellular channel 4	ref|NM_013943|ens|ENST00000374379|gb|Z24749|gb|AL117424	0.0038	up	19.6328
A_23_P381449	NM_003110	SP2	Sp2 transcription factor	ref|NM_003110|ens|ENST00000269000|ens|ENST00000376741|gb|BC016680	0.00103	down	19.6296
A_23_P18205	NM_015106	RAD54L2	RAD54-like 2 (S. cerevisiae)	ref|NM_015106|ens|ENST00000296477|gb|DQ892190|gb|DQ895386	0.00223	down	19.6262
A_23_P101342	NM_032885	ATG4D	ATG4 autophagy related 4 homolog D (S. cerevisiae)	ref|NM_032885|gb|AK056210|gb|BC068992|ens|ENST00000309469	0.00259	down	19.6217
A_24_P106681	NM_012479	YWHAG	tyrosine 3-monooxygenase/tryptophan 5-monooxygenase activation protein, gamma polypeptide	ref|NM_012479|ens|ENST00000307630|gb|AK024230|gb|AB024334	0.00615	up	19.6106
A_24_P388659	NM_031305	ARHGAP24	Rho GTPase activating protein 24	ref|NM_031305|ref|NM_001025616|ref|NM_001042669|gb|BC098580	0.0056	up	19.5882
A_32_P163469	AL833530	NFE2L1	nuclear factor (erythroid-derived 2)-like 1	gb|AL833530|gb|BX647976|thc|NP1162487|thc|THC2594646	0.00399	down	19.5778
A_23_P384499	NM_020761	KIAA1303	raptor	ref|NM_020761|ens|ENST00000306801|gb|BC014502|gb|AB037724	0.00753	down	19.5767
A_32_P12232	NM_017637	BNC2	basonuclin 2	ref|NM_017637|thc|THC2635136	0.00342	down	19.5741
A_24_P76169	ENST00000331306	NA	NA	ens|ENST00000331306|ref|XM_001129191|ref|XM_001134238	0.00627	up	19.5696
A_23_P251945	NM_016221	DCTN4	dynactin 4 (p62)	ref|NM_016221|ens|ENST00000255263|gb|AK125973|gb|BC026323	0.00057	up	19.5652
A_32_P84009	NM_178818	CMTM4	CKLF-like MARVEL transmembrane domain containing 4	ref|NM_178818|ref|NM_181521|gb|AK000855|gb|AF521889	0.0056	up	19.5517
A_23_P371129	NM_032444	BTBD12	BTB (POZ) domain containing 12	ref|NM_032444|gb|BC036335|ens|ENST00000294008|ens|ENST00000294007	0.00766	down	19.5455
A_23_P87941	CR749561	ALDH1L2	aldehyde dehydrogenase 1 family, member L2	gb|CR749561|gb|AF086109|gb|CR627287|thc|THC2540031	0.00713	up	19.5186
A_24_P372217	NM_007175	ERLIN2	ER lipid raft associated 2	ref|NM_007175|ens|ENST00000276461|gb|AL442077|gb|BC035980	<0.00001	up	19.5159
A_23_P117721	NM_001021	RPS17	ribosomal protein S17	ref|NM_001021|ref|NM_001080499|ens|ENST00000330339|ens|ENST00000330244	0.00199	up	19.5152
A_32_P161934	THC2657931	NA	NA	thc|THC2657931	0.00525	down	19.5148
A_23_P130089	NM_174887	IFT20	intraflagellar transport 20 homolog (Chlamydomonas)	ref|NM_174887|gb|AY224601|gb|BC038094|ens|ENST00000357896	0.00098	up	19.5057
A_32_P75284	NM_032116	KATNAL1	katanin p60 subunit A-like 1	ref|NM_032116|ref|NM_001014380|ens|ENST00000380617|ens|ENST00000380615	0.00148	up	19.5055
A_23_P324885	NM_000648	CCR2	chemokine (C-C motif) receptor 2	ref|NM_000648|gb|U03905|gb|X95583|gb|XM_001133431	0.00186	up	19.5042
A_23_P114656	NM_004964	HDAC1	histone deacetylase 1	ref|NM_004964|ens|ENST00000373548|ens|ENST00000373541|gb|D50405	0.00043	down	19.4986
A_24_P58308	AF147412	NA	NA	gb|AF147412|gb|XM_927887|ref|XM_941403|ref|XM_001131640	0.00755	up	19.4981
A_24_P315941	ENST00000390625	IGHG1	immunoglobulin heavy constant gamma 1 (G1m marker)	ens|ENST00000390625|gb|D83692|gb|AF471504|gb|AB066892	0.00417	up	19.4923
A_24_P100234	NM_014941	MORC2	MORC family CW-type zinc finger 2	ref|NM_014941|ens|ENST00000215862|gb|BC141657|gb|CU013307	0.00336	down	19.4896
A_23_P404902	ENST00000378679	NA	NA	ens|ENST00000378679|gb|AB075840|gb|BC040980|thc|NP435307	0.00563	up	19.4692
A_32_P108254	NM_017565	FAM20A	family with sequence similarity 20, member A	ref|NM_017565|gb|AF447872|ens|ENST00000226094|ens|ENST00000375556	0.00305	up	19.4659
A_23_P8424	NM_024070	PVRIG	poliovirus receptor related immunoglobulin domain containing	ref|NM_024070|ens|ENST00000317271|ens|ENST00000379577|gb|BC107873	0.00219	down	19.4591
A_23_P205236	NM_002719	PPP2R5C	protein phosphatase 2, regulatory subunit B', gamma isoform	ref|NM_002719|ref|NM_178586|gb|D26445|gb|AK131391	0.00231	down	19.4499
A_24_P367645	NM_152780	MAP7D2	MAP7 domain containing 2	ref|NM_152780|gb|AK098768|gb|BC089400|ens|ENST00000379651	0.0069	down	19.4388
A_24_P332806	NM_005540	INPP5B	inositol polyphosphate-5-phosphatase, 75kDa	ref|NM_005540|gb|BC062317|ens|ENST00000373023|ens|ENST00000373024	0.00416	down	19.4328
A_23_P205336	NM_016472	C14orf129	chromosome 14 open reading frame 129	ref|NM_016472|ens|ENST00000329856|gb|BC004818|gb|AK094654	0.00421	up	19.4125
A_23_P152344	NM_001520	GTF3C1	general transcription factor IIIC, polypeptide 1, alpha 220kDa	ref|NM_001520|gb|AK131479|ens|ENST00000388971|ens|ENST00000356183	0.0001	down	19.4062
A_24_P516728	AL547890	CENPL	centromere protein L	gb|AL547890	0.00064	up	19.4045
A_24_P927553	A_24_P927553	NA	NA		0.00771	down	19.4023
A_23_P209519	NM_006736	DNAJB2	DnaJ (Hsp40) homolog, subfamily B, member 2	ref|NM_006736|ref|NM_001039550|ens|ENST00000336576|ens|ENST00000258410	0.00549	down	19.3992
A_24_P930162	A_24_P930162	NA	NA		0.00525	down	19.398
A_24_P203909	NM_033625	RPL34	ribosomal protein L34	ref|NM_033625|ref|NM_000995|ens|ENST00000359951|gb|CR542232	0.00639	up	19.3882
A_23_P169470	NM_001261	CDK9	cyclin-dependent kinase 9	ref|NM_001261|ens|ENST00000373264|ens|ENST00000373265|gb|X80230	0.00538	down	19.3694
A_23_P117424	NM_025230	WDR23	WD repeat domain 23	ref|NM_025230|ref|NM_181357|gb|AF130070|ens|ENST00000326009	0.00007	down	19.3416
A_23_P107336	NM_014716	ACAP1	ArfGAP with coiled-coil, ankyrin repeat and PH domains 1	ref|NM_014716|ens|ENST00000158762|gb|BT009788|gb|DQ891719	0.00506	down	19.3416
A_32_P232865	NM_021574	BCR	breakpoint cluster region	ref|NM_021574|ref|NM_004327|ens|ENST00000305877|ens|ENST00000359540	0.00296	down	19.338
A_24_P46130	NM_001099	ACPP	acid phosphatase, prostate	ref|NM_001099|ens|ENST00000336375|gb|M34840|gb|BC016344	0.0001	up	19.3337
A_23_P104798	NM_001562	IL18	interleukin 18 (interferon-gamma-inducing factor)	ref|NM_001562|gb|AY266351|ens|ENST00000280357|gb|CR542001	0.00129	up	19.3198
A_24_P396702	NM_014880	CD302	CD302 molecule	ref|NM_014880|ens|ENST00000259053|gb|AY314007|gb|D14664	0.00382	up	19.3139
A_24_P366165	XR_019504	RPL26P12	ribosomal protein L26 pseudogene 12	gb|XR_019504|ref|XR_017684	0.00235	up	19.3059
A_32_P32876	A_32_P32876	NA	NA		0.00135	down	19.3048
A_23_P391264	NM_007047	BTN3A2	butyrophilin, subfamily 3, member A2	ref|NM_007047|gb|BC020214|ens|ENST00000356386|ens|ENST00000377708	0.00626	down	19.3043
A_24_P315862	ENST00000390630	NA	NA	ens|ENST00000390630|ens|ENST00000390629|ens|ENST00000390614|gb|S73508	0.00098	up	19.3029
A_24_P18105	NM_032466	ASPH	aspartate beta-hydroxylase	ref|NM_032466|ref|NM_032468|gb|BC025236|ens|ENST00000379451	0.00827	up	19.2982
A_23_P56127	NM_019108	C19orf61	chromosome 19 open reading frame 61	ref|NM_019108|gb|BC008869|gb|AK022948|ens|ENST00000222379	0.00052	down	19.2913
A_23_P64913	NM_006205	PDE6H	phosphodiesterase 6H, cGMP-specific, cone, gamma	ref|NM_006205|ens|ENST00000266395|gb|BC069774|gb|BC069800	<0.00001	up	19.2893
A_23_P125815	NM_005676	RBM10	RNA binding motif protein 10	ref|NM_005676|ref|NM_152856|gb|D50912|gb|AK000962	0.00721	down	19.2893
A_23_P205738	NM_138576	BCL11B	B-cell CLL/lymphoma 11B (zinc finger protein)	ref|NM_138576|ref|NM_022898|ens|ENST00000357195|ens|ENST00000345514	0.00732	down	19.2881
A_23_P48897	AF011794	CCPG1	cell cycle progression 1	gb|AF011794|gb|AF212228|thc|THC2479879	0.0053	up	19.2694
A_23_P50517	ENST00000314121	NA	NA	ens|ENST00000314121|ens|ENST00000263351|gb|AL833862|gb|AL136846	0.00531	down	19.264
A_24_P185624	NM_173179	SLC35C2	solute carrier family 35, member C2	ref|NM_173179|ref|NM_015945|ref|NM_173073|gb|AK128842	<0.00001	down	19.2635
A_24_P204414	XR_016475	NA	NA	gb|XR_016475	0.00052	up	19.2547
A_23_P58266	NM_005980	S100P	S100 calcium binding protein P	ref|NM_005980|ens|ENST00000296370|ens|ENST00000382576|gb|X65614	0.00159	up	19.2493
A_23_P63243	NM_138740	C1orf43	chromosome 1 open reading frame 43	ref|NM_138740|ref|NM_015449|gb|BC000152|ens|ENST00000350592	0.00138	up	19.2488
A_23_P203601	NM_003356	UCP3	uncoupling protein 3 (mitochondrial, proton carrier)	ref|NM_003356|ens|ENST00000314032|ens|ENST00000348534|gb|BC008392	0.00002	down	19.2412
A_24_P193600	NM_003450	ZNF174	zinc finger protein 174	ref|NM_003450|ens|ENST00000268655|gb|U31248|thc|THC2471169	0.00751	down	19.2394
A_23_P137484	NM_019079	L1TD1	LINE-1 type transposase domain containing 1	ref|NM_019079|ens|ENST00000371155|gb|AK001746|gb|BC060808	0.00117	up	19.2332
A_23_P146444	ENST00000343933	NA	NA	ens|ENST00000343933|ens|ENST00000375077|gb|BX648086|thc|THC2496529	0.00319	up	19.2308
A_23_P102950	NM_080860	RSPH1	radial spoke head 1 homolog (Chlamydomonas)	ref|NM_080860|ens|ENST00000291536|gb|AB041016|gb|AK057315	0.00382	up	19.2221
A_24_P13230	NM_002869	RAB6A	RAB6A, member RAS oncogene family	ref|NM_002869|ref|NM_198896|ref|NM_032144|ens|ENST00000310653	0.00019	up	19.2182
A_32_P324533	NM_053282	SH2D1B	SH2 domain containing 1B	ref|NM_053282|ens|ENST00000367929|ens|ENST00000359567|gb|BC066595	0.00259	down	19.2087
A_24_P333193	AF090933	NA	NA	gb|AF090933|thc|THC2489449	0.00702	down	19.2053
A_32_P6015	NM_005515	MNX1	motor neuron and pancreas homeobox 1	ref|NM_005515|ens|ENST00000252971|gb|AF107457|thc|THC2603024	0.00064	up	19.2015
A_23_P8561	NM_001040457	RHBDD2	rhomboid domain containing 2	ref|NM_001040457|ref|NM_001040456|gb|BC069017|ens|ENST00000318622	0.00423	down	19.2
A_23_P208706	NM_138764	BAX	BCL2-associated X protein	ref|NM_138764|ref|NM_138761|ref|NM_138765|ref|NM_138763	<0.00001	down	19.1948
A_24_P180225	NM_002111	HTT	huntingtin	ref|NM_002111|gb|AB209506|ens|ENST00000389752|ens|ENST00000389753	0.00009	down	19.1882
A_23_P58506	ENST00000379969	NA	NA	ens|ENST00000379969|gb|BX538289|thc|THC2528521	0.00564	up	19.1868
A_24_P406591	BE388027	NA	NA	gb|BE388027|thc|THC2616290	0.00254	down	19.186
A_23_P170830	CD709370	NA	NA	gb|CD709370	0.00625	up	19.1756
A_24_P40968	NM_001080541	NA	NA	ref|NM_001080541|ens|ENST00000389936|ens|ENST00000389935|gb|AK056470	0.00439	down	19.1723
A_23_P68601	NM_003650	CST7	cystatin F (leukocystatin)	ref|NM_003650|gb|BC015507|ens|ENST00000376835|gb|AF031824	0.00406	down	19.1713
A_23_P326893	NM_145045	CCDC151	coiled-coil domain containing 151	ref|NM_145045|ens|ENST00000356392|ens|ENST00000356852|gb|AK056363	0.00017	up	19.1703
A_24_P116587	NM_201575	SEZ6L2	seizure related 6 homolog (mouse)-like 2	ref|NM_201575|ref|NM_012410|gb|AJ245822|gb|BC000567	0.00196	down	19.1635
A_24_P307665	AK021848	NA	NA	gb|AK021848|gb|BX107840|thc|THC2481528	0.00115	down	19.1571
A_23_P113789	NM_006677	USP19	ubiquitin specific peptidase 19	ref|NM_006677|ens|ENST00000335373|gb|BC128088|gb|BC014934	0.00376	down	19.1558
A_32_P190488	ENST00000356196	NA	NA	ens|ENST00000356196|gb|XR_018048|gb|XR_016751|gb|XR_019504	0.00594	up	19.1547
A_24_P224538	NM_006804	STARD3	StAR-related lipid transfer (START) domain containing 3	ref|NM_006804|ens|ENST00000336308|gb|BT006964|gb|DQ890575	0.00826	down	19.1406
A_32_P22539	ENST00000356196	NA	NA	ens|ENST00000356196|ref|XM_374987|ref|XM_940327|gb|BP236902	0.00807	up	19.1364
A_23_P82324	NM_032415	CARD11	caspase recruitment domain family, member 11	ref|NM_032415|gb|BC111719|ens|ENST00000356408|ens|ENST00000355508	0.00093	down	19.1358
A_23_P170280	NM_020453	ATP10D	ATPase, class V, type 10D	ref|NM_020453|ens|ENST00000381560|ens|ENST00000273859|gb|AK027598	0.00179	up	19.1341
A_23_P26810	NM_000546	TP53	tumor protein p53	ref|NM_000546|gb|BC003596|gb|DQ186648|gb|DQ186649	0.00025	down	19.1324
A_23_P68539	ENST00000379563	NA	NA	ens|ENST00000379563|ens|ENST00000358134|ens|ENST00000262926|gb|AK123956	0.00244	down	19.123
A_24_P136866	NM_021097	SLC8A1	solute carrier family 8 (sodium/calcium exchanger), member 1	ref|NM_021097|gb|AF128524|gb|M91368|gb|BX648299	0.00033	up	19.1201
A_32_P117016	CR749561	ALDH1L2	aldehyde dehydrogenase 1 family, member L2	gb|CR749561|gb|AK094088|gb|BX537599|gb|CR627287	0.00746	up	19.1157
A_32_P865343	AL359654	NA	NA	gb|AL359654|thc|THC2605844	0.00157	down	19.112
A_23_P86100	NM_001007255	KLHDC9	kelch domain containing 9	ref|NM_001007255|ref|NM_152366|ref|NM_001007256|gb|BC032482	0.00498	up	19.0979
A_23_P32722	NM_024741	ZNF408	zinc finger protein 408	ref|NM_024741|ens|ENST00000311764|gb|AF346626|gb|AK022889	0.00486	down	19.0965
A_24_P383999	NM_001006	RPS3A	ribosomal protein S3A	ref|NM_001006|ens|ENST00000274065|gb|DQ891143|gb|DQ894322	0.00482	up	19.0878
A_32_P171903	BQ233868	NA	NA	gb|BQ233868|thc|THC2741275|thc|THC2624270	0.00556	up	19.0789
A_24_P151582	NM_003216	TEF	thyrotrophic embryonic factor	ref|NM_003216|ens|ENST00000266304|gb|BC039258|gb|BC021980	0.00289	down	19.0766
A_23_P138352	NM_004185	WNT2B	wingless-type MMTV integration site family, member 2B	ref|NM_004185|ref|NM_024494|gb|AK127449|ens|ENST00000369686	0.00148	down	19.0737
A_32_P22078	NM_001013	RPS9	ribosomal protein S9	ref|NM_001013|ens|ENST00000302907|gb|BC050660|gb|DQ891200	0.00002	up	19.0601
A_23_P156970	NM_002402	MEST	mesoderm specific transcript homolog (mouse)	ref|NM_002402|ref|NM_177524|ref|NM_177525|gb|BC090049	0.0044	up	19.0589
A_24_P942773	NM_007159	SLMAP	sarcolemma associated protein	ref|NM_007159|ens|ENST00000295952|gb|AB046821|gb|AL834538	0.00115	up	19.0583
A_23_P140190	ENST00000360329	NA	NA	ens|ENST00000360329|gb|AF161538|gb|BC030286|gb|BC016766	0.00585	up	19.0542
A_23_P151614	NM_006263	PSME1	proteasome (prosome, macropain) activator subunit 1 (PA28 alpha)	ref|NM_006263|ref|NM_176783|ens|ENST00000206451|ens|ENST00000382708	<0.00001	down	19.0476
A_23_P319808	NM_015054	UHRF1BP1L	UHRF1 binding protein 1-like	ref|NM_015054|gb|AB014601|ens|ENST00000279907|gb|AL833850	0.00011	up	19.0476
A_23_P166609	NM_014966	DHX30	DEAH (Asp-Glu-Ala-His) box polypeptide 30	ref|NM_014966|ref|NM_138615|gb|BC038417|ens|ENST00000348968	0.00614	down	19.0476
A_23_P140241	NM_020920	CHD8	chromodomain helicase DNA binding protein 8	ref|NM_020920|gb|AB046784|ens|ENST00000262707|gb|BC063693	0.00051	down	19.0432
A_23_P50799	NM_013939	OR10H2	olfactory receptor, family 10, subfamily H, member 2	ref|NM_013939|gb|BC112178|ens|ENST00000305899|gb|BC069085	0.00096	down	19.039
A_32_P98313	NM_002489	NDUFA4	NADH dehydrogenase (ubiquinone) 1 alpha subcomplex, 4, 9kDa	ref|NM_002489|ens|ENST00000273343|gb|CR407618|gb|CR541716	0.00309	up	19.0371
A_23_P251011	ENST00000379969	NA	NA	ens|ENST00000379969|gb|BX538289|gb|AV652801|thc|THC2516800	0.00538	up	19.0149
A_23_P24594	NM_006597	HSPA8	heat shock 70kDa protein 8	ref|NM_006597|ref|NM_153201|gb|BC016179|ens|ENST00000227378	0.00312	down	19.0058
A_23_P120227	NM_030915	LBH	limb bud and heart development homolog (mouse)	ref|NM_030915|gb|BC109376|ens|ENST00000343745|gb|AK023425	0.00034	down	19.001
A_32_P806841	NM_005738	ARL4A	ADP-ribosylation factor-like 4A	ref|NM_005738|ref|NM_001037164|ref|NM_212460|ens|ENST00000356797	0.00155	up	18.9995
A_23_P75609	NM_014956	CEP164	centrosomal protein 164kDa	ref|NM_014956|gb|BX648682|ens|ENST00000278935|gb|AB028975	0.00225	down	18.9979
A_24_P600036	A_24_P600036	NA	NA		0.00472	down	18.9979
A_23_P160618	NM_003975	SH2D2A	SH2 domain protein 2A	ref|NM_003975|gb|AY763100|gb|AY763099|gb|BC012107	0.00487	down	18.9926
A_23_P135548	NM_000110	DPYD	dihydropyrimidine dehydrogenase	ref|NM_000110|gb|U20938|ens|ENST00000370192|gb|U09178	0.00437	up	18.9889
A_23_P205188	NM_017905	TMCO3	transmembrane and coiled-coil domains 3	ref|NM_017905|gb|BC068515|gb|BC012564|ens|ENST00000279934	0.00002	up	18.9853
A_24_P41801	NM_005577	LPA	lipoprotein, Lp(a)	ref|NM_005577|ens|ENST00000316325|ens|ENST00000316300|gb|X06290	0.00079	down	18.9847
A_32_P11931	XR_016376	RPL26P19	ribosomal protein L26 pseudogene 19	ref|XR_016376|ref|XR_018937|gb|BP217036	0.00213	up	18.9847
A_24_P602255	THC2517310	NA	NA	thc|THC2517310	0.00728	up	18.9721
A_24_P99371	NM_017736	THUMPD1	THUMP domain containing 1	ref|NM_017736|gb|BC000448|gb|BX640898|ens|ENST00000173569	0.00001	down	18.9655
A_23_P11279	NM_018466	ALG13	asparagine-linked glycosylation 13 homolog (S. cerevisiae)	ref|NM_018466|ens|ENST00000371979|gb|AF220051|gb|BC005336	0.00085	up	18.9595
A_24_P529627	ENST00000390353	IFI6	interferon, alpha-inducible protein 6	ens|ENST00000390353|gb|A25965|gb|X58809|gb|L06890	0.00403	down	18.9583
A_23_P114656	NM_004964	HDAC1	histone deacetylase 1	ref|NM_004964|ens|ENST00000373548|ens|ENST00000373541|gb|D50405	0.00038	down	18.9474
A_32_P140823	NM_006985	NPIP	nuclear pore complex interacting protein	ref|NM_006985|gb|BC036263|gb|AF132984|ens|ENST00000328085	0.00697	down	18.9448
A_23_P18267	NM_006545	TUSC4	tumor suppressor candidate 4	ref|NM_006545|ens|ENST00000232501|gb|BC008802|gb|AF040707	0.00718	down	18.9427
A_24_P84752	AK002210	NA	NA	gb|AK002210|thc|THC2487394	0.00552	down	18.9419
A_23_P79572	BC008026	MGC16025	hypothetical LOC85009	gb|BC008026	0.00254	up	18.9338
A_32_P224040	A_32_P224040	NA	NA		0.00229	down	18.9243
A_32_P113190	THC2630755	NA	NA	thc|THC2630755	0.00309	up	18.9209
A_23_P46351	NM_006862	TDRKH	tudor and KH domain containing	ref|NM_006862|gb|BC032690|gb|AK056402|gb|BC022467	0.0083	down	18.9135
A_23_P145480	NM_000914	OPRM1	opioid receptor, mu 1	ref|NM_000914|ens|ENST00000330432|gb|L25119|thc|THC2490208	0.00827	down	18.9116
A_23_P319583	NM_014747	RIMS3	regulating synaptic membrane exocytosis 3	ref|NM_014747|ens|ENST00000372684|gb|D87074|thc|THC2620142	0.00701	down	18.9106
A_24_P587621	XR_018206	NA	NA	gb|XR_018206|ref|XR_016819	0.00705	down	18.8976
A_24_P367543	AK024382	NA	NA	gb|AK024382|thc|THC2484634	0.00402	down	18.8919
A_23_P146865	NM_024773	JMJD5	jumonji domain containing 5	ref|NM_024773|gb|AK023860|gb|BC027911|thc|THC2473037	0.00537	down	18.8889
A_24_P255896	A_24_P255896	NA	NA		0.00009	down	18.8841
A_23_P200976	NM_031207	HYI	hydroxypyruvate isomerase homolog (E. coli)	ref|NM_031207|ens|ENST00000326220|ens|ENST00000372430|ens|ENST00000372425	0.00572	up	18.8696
A_24_P920534	NM_000849	GSTM3	glutathione S-transferase mu 3 (brain)	ref|NM_000849|gb|BC030253|ens|ENST00000256594|thc|THC2626354	0.00599	down	18.8672
A_23_P204482	NM_006861	RAB35	RAB35, member RAS oncogene family	ref|NM_006861|ens|ENST00000229340|gb|BC015931|gb|AK001309	0.00018	down	18.863
A_24_P29686	NM_031449	ZMIZ2	zinc finger, MIZ-type containing 2	ref|NM_031449|ref|NM_174929|gb|AK090415|ens|ENST00000309315	0.00299	down	18.8455
A_23_P86632	NM_022487	DCLRE1C	DNA cross-link repair 1C (PSO2 homolog, S. cerevisiae)	ref|NM_022487|ref|NM_001033858|ref|NM_001033857|ref|NM_001033855	0.00153	down	18.845
A_24_P96593	NM_005665	EVI5	ecotropic viral integration site 5	ref|NM_005665|ens|ENST00000370330|ens|ENST00000370331|gb|AF008915	0.00014	up	18.8447
A_32_P121704	CA945082	NA	NA	gb|CA945082|thc|THC2617728	0.00377	down	18.84
A_23_P169576	NM_001013848	EXOC6	exocyst complex component 6	ref|NM_001013848|ref|NM_019053|gb|BC028395|gb|BC041403	0.00102	up	18.8361
A_23_P210348	NM_004718	COX7A2L	cytochrome c oxidase subunit VIIa polypeptide 2 like	ref|NM_004718|ens|ENST00000234301|gb|AK092911|gb|AK130281	0.00126	up	18.835
A_23_P13425	NM_004356	CD81	CD81 molecule	ref|NM_004356|ens|ENST00000356230|ens|ENST00000263645|gb|M33680	0.00644	down	18.8293
A_23_P107847	NM_181985	LILRA5	leukocyte immunoglobulin-like receptor, subfamily A (with TM domain), member 5	ref|NM_181985|ref|NM_021250|ens|ENST00000301219|ens|ENST00000346508	0.0042	up	18.8238
A_23_P218774	NM_002872	RAC2	ras-related C3 botulinum toxin substrate 2 (rho family, small GTP binding protein Rac2)	ref|NM_002872|ens|ENST00000249071|gb|BC018735|gb|AF077208	0.00165	down	18.8235
A_23_P131435	NM_014880	CD302	CD302 molecule	ref|NM_014880|gb|BC020646|ens|ENST00000259053|gb|AY184222	0.00102	up	18.8197
A_23_P136135	NM_001277	CHKA	choline kinase alpha	ref|NM_001277|ref|NM_212469|ens|ENST00000265689|ens|ENST00000356135	0.00692	up	18.8192
A_23_P77401	NM_018340	FLJ11151	hypothetical protein FLJ11151	ref|NM_018340|gb|BX640805|ens|ENST00000261660|ens|ENST00000381774	0.0066	up	18.8136
A_23_P4561	NM_198833	SERPINB8	serpin peptidase inhibitor, clade B (ovalbumin), member 8	ref|NM_198833|ref|NM_002640|ens|ENST00000353706|gb|L40377	0.00132	up	18.8057
A_32_P137487	AL832255	NA	NA	gb|AL832255	0.00696	down	18.8027
A_32_P466979	AK054965	FLJ30403	hypothetical protein LOC729975	gb|AK054965|ens|ENST00000301439|thc|THC2478462	0.00299	down	18.799
A_23_P32500	NM_015136	STAB1	stabilin 1	ref|NM_015136|ens|ENST00000321725|gb|AJ275213|gb|D87433	0.00188	up	18.797
A_23_P158969	NM_139177	SLC39A11	solute carrier family 39 (metal ion transporter), member 11	ref|NM_139177|gb|AK095227|ens|ENST00000255559|ens|ENST00000356155	0.00184	up	18.7882
A_32_P147078	NM_021097	SLC8A1	solute carrier family 8 (sodium/calcium exchanger), member 1	ref|NM_021097|gb|BX648299|ens|ENST00000378715|gb|X91221	<0.00001	up	18.7773
A_23_P71433	NM_001001481	UBE2W	ubiquitin-conjugating enzyme E2W (putative)	ref|NM_001001481|ref|NM_018299|ref|NM_001001482|ens|ENST00000362030	0.0031	up	18.7767
A_24_P147461	NM_198833	SERPINB8	serpin peptidase inhibitor, clade B (ovalbumin), member 8	ref|NM_198833|ref|NM_001031848|ref|NM_002640|ens|ENST00000353706	0.00027	up	18.7729
A_23_P74799	NM_213651	SLC25A24	solute carrier family 25 (mitochondrial carrier; phosphate carrier), member 24	ref|NM_213651|ref|NM_013386|gb|BC068561|ens|ENST00000264128	0.00419	up	18.75
A_23_P102973	NM_022719	DGCR14	DiGeorge syndrome critical region gene 14	ref|NM_022719|ens|ENST00000252137|gb|L77566|gb|L78010	0.00477	down	18.75
A_32_P220127	NM_033625	RPL34	ribosomal protein L34	ref|NM_033625|ref|NM_000995|ens|ENST00000359951|gb|CR542232	0.00197	up	18.7358
A_24_P252078	NM_007047	BTN3A2	butyrophilin, subfamily 3, member A2	ref|NM_007047|gb|BC067086|ens|ENST00000356386|ens|ENST00000377708	0.00085	down	18.7346
A_23_P138308	NM_001779	CD58	CD58 molecule	ref|NM_001779|gb|BC005930|gb|X06296|ens|ENST00000369489	0.00085	up	18.7342
A_23_P11697	NM_145205	HMGB4	high-mobility group box 4	ref|NM_145205|ref|NM_001008728|gb|AK097707|ens|ENST00000323936	0.00817	down	18.7335
A_24_P942893	NM_144582	TEX261	testis expressed 261	ref|NM_144582|ens|ENST00000272438|gb|AK056410|gb|AK074840	0.00595	down	18.7291
A_32_P194032	NM_152271	LONRF1	LON peptidase N-terminal domain and ring finger 1	ref|NM_152271|gb|BC106042|ens|ENST00000284538|gb|BC004538	0.00657	up	18.7218
A_23_P62115	NM_003254	TIMP1	TIMP metallopeptidase inhibitor 1	ref|NM_003254|gb|BC000866|ens|ENST00000218388|ens|ENST00000377013	0.00183	up	18.7135
A_24_P65941	AK024509	C21orf96	chromosome 21 open reading frame 96	gb|AK024509|gb|BC117305|thc|THC2480550	0.0041	down	18.7089
A_24_P404245	NM_002861	PCYT2	phosphate cytidylyltransferase 2, ethanolamine	ref|NM_002861|ens|ENST00000331285|gb|CR456779|gb|AY251539	0.00067	down	18.7067
A_24_P119577	NM_023923	PHACTR4	phosphatase and actin regulator 4	ref|NM_023923|ref|NM_001048183|ens|ENST00000373836|ens|ENST00000373839	0.00353	down	18.7067
A_24_P22488	NM_003502	AXIN1	axin 1	ref|NM_003502|ref|NM_181050|ens|ENST00000262320|ens|ENST00000354866	0.00711	down	18.705
A_23_P72117	NM_006714	SMPDL3A	sphingomyelin phosphodiesterase, acid-like 3A	ref|NM_006714|ens|ENST00000368440|gb|AK000184|gb|Y08136	0.00259	up	18.7046
A_23_P135926	A_23_P135926	NA	NA		0.00019	down	18.7023
A_24_P913115	NM_000314	PTEN	phosphatase and tensin homolog	ref|NM_000314|gb|AK024986|thc|THC2519743|gb|AL138010	0.00187	up	18.7016
A_24_P901856	AK056135	DUXAP10	double homeobox A pseudogene 10	gb|AK056135|gb|AK022914|thc|THC2495267|thc|THC2497680	0.00351	up	18.7014
A_32_P17743	THC2670504	NA	NA	thc|THC2670504	0.00223	up	18.6992
A_24_P927090	AF116678	NA	NA	gb|AF116678|thc|THC2484746	0.00754	down	18.6934
A_23_P211550	NM_014248	RBX1	ring-box 1	ref|NM_014248|ens|ENST00000216225|gb|AF142059|gb|CU013448	0.00238	up	18.6885
A_23_P66543	NM_014308	PIK3R5	phosphoinositide-3-kinase, regulatory subunit 5	ref|NM_014308|ens|ENST00000269300|gb|AF128881|thc|THC2485160	0.00004	down	18.6852
A_32_P174083	NM_018947	CYCS	cytochrome c, somatic	ref|NM_018947|ens|ENST00000305786|thc|THC2519583	0.00792	down	18.6842
A_32_P95960	NM_001004419	CLEC2D	C-type lectin domain family 2, member D	ref|NM_001004419|ref|NM_013269|thc|THC2503406	0.00393	down	18.6821
A_23_P106720	NM_006453	TBL3	transducin (beta)-like 3	ref|NM_006453|ens|ENST00000332704|ens|ENST00000355082|gb|U02609	0.00604	down	18.6813
A_23_P146111	NM_024759	NPAL2	NIPA-like domain containing 2	ref|NM_024759|ens|ENST00000341166|gb|BC132687|gb|AK024017	0.00488	up	18.6756
A_24_P103004	NM_005415	SLC20A1	solute carrier family 20 (phosphate transporter), member 1	ref|NM_005415|ens|ENST00000272542|gb|DQ893562|gb|DQ894238	0.00006	down	18.6698
A_24_P801451	NM_006709	EHMT2	euchromatic histone-lysine N-methyltransferase 2	ref|NM_006709|ref|NM_025256|gb|BC018718|ens|ENST00000375530	0.00148	down	18.6667
A_24_P658584	NM_015278	SASH1	SAM and SH3 domain containing 1	ref|NM_015278|gb|AJ507735|ens|ENST00000367467|gb|AK023607	0.00038	up	18.6626
A_23_P149019	NM_001703	BAI2	brain-specific angiogenesis inhibitor 2	ref|NM_001703|gb|AB005298|ens|ENST00000257070|ens|ENST00000373655	0.00335	down	18.6543
A_23_P79725	NM_022730	COPS7B	COP9 constitutive photomorphogenic homolog subunit 7B (Arabidopsis)	ref|NM_022730|gb|AK126326|gb|BC091493|gb|AK024273	0.00077	down	18.6441
A_24_P152855	A_24_P152855	NA	NA		0.00023	down	18.6411
A_23_P98085	NM_000314	PTEN	phosphatase and tensin homolog	ref|NM_000314|ens|ENST00000371953|gb|U92436|gb|BC038293	0.00086	up	18.6349
A_23_P41455	NM_003305	TRPC3	transient receptor potential cation channel, subfamily C, member 3	ref|NM_003305|gb|AY865574|ens|ENST00000264811|ens|ENST00000379645	0.00252	down	18.6312
A_23_P211007	NM_003489	NRIP1	nuclear receptor interacting protein 1	ref|NM_003489|gb|AK123818|gb|X84373|gb|BG504525	0.00001	up	18.6124
A_23_P138856	NM_006442	DRAP1	DR1-associated protein 1 (negative cofactor 2 alpha)	ref|NM_006442|ens|ENST00000312515|ens|ENST00000376991|gb|X96506	0.00151	down	18.6104
A_23_P82523	NM_000927	ABCB1	ATP-binding cassette, sub-family B (MDR/TAP), member 1	ref|NM_000927|gb|AF016535|ens|ENST00000265724|gb|AM393352	0.00308	down	18.5943
A_24_P257971	NM_005094	SLC27A4	solute carrier family 27 (fatty acid transporter), member 4	ref|NM_005094|gb|BC009959|ens|ENST00000300456|ens|ENST00000372870	0.00497	down	18.5936
A_23_P419051	NM_032632	PAPOLA	poly(A) polymerase alpha	ref|NM_032632|ens|ENST00000216277|gb|BC000927|gb|BC036014	0.00341	up	18.5915
A_24_P56130	NM_079423	MYL6	myosin, light chain 6, alkali, smooth muscle and non-muscle	ref|NM_079423|ref|NM_021019|gb|M22920|gb|BC093066	0.00391	up	18.5799
A_23_P125829	NM_000291	PGK1	phosphoglycerate kinase 1	ref|NM_000291|gb|V00572|gb|L00160|gb|BC103752	0.00541	up	18.5759
A_32_P36192	NM_004640	BAT1	HLA-B associated transcript 1	ref|NM_004640|ref|NM_080598|ens|ENST00000376185|ens|ENST00000376177	0.00258	down	18.5714
A_24_P851232	AK022645	NA	NA	gb|AK022645|thc|THC2606324	0.00005	down	18.5691
A_23_P97860	NM_000235	LIPA	lipase A, lysosomal acid, cholesterol esterase	ref|NM_000235|gb|AK125193|gb|AK096406|ens|ENST00000371829	0.00533	up	18.5638
A_23_P147404	A_23_P147404	NA	NA		0.00326	up	18.5637
A_32_P34116	NM_138459	NUS1	nuclear undecaprenyl pyrophosphate synthase 1 homolog (S. cerevisiae)	ref|NM_138459|ens|ENST00000368494|gb|AK125119|gb|AK126335	0.0039	up	18.5484
A_32_P164630	NM_001014	RPS10	ribosomal protein S10	ref|NM_001014|gb|BC030568|ens|ENST00000326199|ens|ENST00000374053	0.00005	up	18.5249
A_23_P112613	ENST00000356126	NA	NA	ens|ENST00000356126|ens|ENST00000357146|gb|AK095141|gb|AB003103	0.0002	up	18.5185
A_23_P141394	NM_017983	WIPI1	WD repeat domain, phosphoinositide interacting 1	ref|NM_017983|ens|ENST00000262139|ens|ENST00000375583|gb|AK000917	0.00194	up	18.5185
A_23_P49327	NM_003450	ZNF174	zinc finger protein 174	ref|NM_003450|ens|ENST00000268655|gb|U31248|thc|THC2471169	0.00731	down	18.5185
A_24_P380284	NM_019119	PCDHB9	protocadherin beta 9	ref|NM_019119|gb|AF152502|gb|BC100672|gb|BC105636	0.00703	down	18.5174
A_24_P238377	A_24_P238377	NA	NA		0.00126	down	18.5168
A_24_P73848	AK057261	FBF1	Fas (TNFRSF6) binding factor 1	gb|AK057261|ens|ENST00000319129|gb|AK074045|gb|BC012332	0.00215	down	18.5115
A_23_P371039	NM_002531	NTSR1	neurotensin receptor 1 (high affinity)	ref|NM_002531|ens|ENST00000370501|gb|X70070|gb|BC040711	0.00583	up	18.4966
A_23_P389676	ENST00000340158	NA	NA	ens|ENST00000340158|gb|AK131103|gb|AK074086|gb|BC034427	0.00726	down	18.4964
A_24_P101642	NP109842	NA	NA	thc|NP109842	0.00512	up	18.4957
A_32_P38467	BC039555	SNHG8	small nucleolar RNA host gene 8 (non-protein coding)	gb|BC039555|gb|BC017993|thc|THC2722842|thc|THC2672387	0.00057	up	18.495
A_23_P208706	NM_138764	BAX	BCL2-associated X protein	ref|NM_138764|ref|NM_138761|ref|NM_138765|ref|NM_138763	<0.00001	down	18.4925
A_23_P114155	NM_015698	GPKOW	G patch domain and KOW motifs	ref|NM_015698|ens|ENST00000156109|ens|ENST00000376346|gb|U66359	<0.00001	down	18.4783
A_24_P229350	NM_175736	FMNL3	formin-like 3	ref|NM_175736|ref|NM_198900|gb|AK128195|gb|BC033181	0.00269	down	18.4743
A_24_P8257	BC009036	NA	NA	gb|BC009036|thc|THC2666904	0.00469	down	18.4637
A_32_P224888	AK054895	NA	NA	gb|AK054895|thc|THC2609014	0.00493	down	18.4598
A_32_P203979	BX112970	NA	NA	gb|BX112970	0.00012	up	18.4587
A_23_P411723	NM_002655	PLAG1	pleiomorphic adenoma gene 1	ref|NM_002655|ens|ENST00000316981|gb|U65002|thc|THC2649104	0.00059	up	18.451
A_24_P47467	NM_024092	TMEM109	transmembrane protein 109	ref|NM_024092|ens|ENST00000227525|gb|AX775851|gb|AX775849	0.00001	down	18.43
A_23_P98085	NM_000314	PTEN	phosphatase and tensin homolog	ref|NM_000314|ens|ENST00000371953|gb|U92436|gb|BC038293	0.00109	up	18.4237
A_24_P185158	NM_178126	FAM134C	family with sequence similarity 134, member C	ref|NM_178126|ens|ENST00000309428|gb|AK057409|gb|AK091125	0.00148	down	18.4
A_23_P152791	NM_004694	SLC16A6	solute carrier family 16, member 6 (monocarboxylic acid transporter 7)	ref|NM_004694|ens|ENST00000327268|ens|ENST00000344066|gb|AX750577	<0.00001	up	18.3969
A_23_P98786	NM_000260	MYO7A	myosin VIIA	ref|NM_000260|gb|U55208|ens|ENST00000358342|ens|ENST00000343356	0.00594	up	18.3934
A_23_P255286	NM_017951	SMPD4	sphingomyelin phosphodiesterase 4, neutral membrane (neutral sphingomyelinase-3)	ref|NM_017951|ref|NM_017751|gb|AB037839|gb|AK126920	0.00308	down	18.3857
A_24_P786357	AK125982	LOC389043	hypothetical gene supported by AK125982; BC042817	gb|AK125982|gb|BC087855|ref|XM_374012|ref|XM_943029	0.00089	down	18.3799
A_23_P393713	NM_002180	IGHMBP2	immunoglobulin mu binding protein 2	ref|NM_002180|ens|ENST00000255078|gb|L14754|gb|AB208802	0.00225	down	18.3775
A_24_P936141	THC2657742	NA	NA	thc|THC2657742	0.00547	down	18.3737
A_23_P374322	NM_153218	C13orf31	chromosome 13 open reading frame 31	ref|NM_153218|ens|ENST00000325686|gb|BC035749|gb|AK096044	0.00849	up	18.3697
A_23_P208446	NM_002967	SAFB	scaffold attachment factor B	ref|NM_002967|ens|ENST00000292123|gb|BC126219|gb|AK095736	0.00271	down	18.3673
A_24_P296907	NM_152658	THAP8	THAP domain containing 8	ref|NM_152658|ens|ENST00000292894|gb|AK057453|gb|AK093048	0.00251	down	18.3636
A_24_P44341	NM_020121	UGCGL2	UDP-glucose ceramide glucosyltransferase-like 2	ref|NM_020121|gb|BC032302|gb|BC067807|ens|ENST00000376747	0.00236	up	18.3611
A_23_P502158	NM_002390	ADAM11	ADAM metallopeptidase domain 11	ref|NM_002390|ens|ENST00000200557|ens|ENST00000355638|gb|BC111916	0.00383	down	18.361
A_23_P395493	BC031631	CFLP1	cofilin pseudogene 1	gb|BC031631|thc|THC2486844	0.00086	down	18.3486
A_23_P95640	NM_001007544	C1orf186	chromosome 1 open reading frame 186	ref|NM_001007544|ens|ENST00000331555|gb|AK122631|gb|BC071785	0.00562	up	18.3463
A_23_P201628	NM_002293	LAMC1	laminin, gamma 1 (formerly LAMB2)	ref|NM_002293|ens|ENST00000258341|gb|BC035429|thc|THC2538877	0.00275	up	18.3445
A_24_P252846	NM_138787	C11orf74	chromosome 11 open reading frame 74	ref|NM_138787|gb|BC009561|ens|ENST00000334307|ens|ENST00000347206	<0.00001	up	18.3369
A_24_P416370	NM_024015	HOXB4	homeobox B4	ref|NM_024015|ens|ENST00000332503|gb|BC049204|gb|AL137449	0.0059	down	18.3362
A_23_P3562	NM_032178	SLC7A6OS	solute carrier family 7, member 6 opposite strand	ref|NM_032178|gb|AK023353|gb|BC013778|gb|AK225712	0.00762	down	18.3258
A_23_P12082	NM_004000	CHI3L2	chitinase 3-like 2	ref|NM_004000|ref|NM_001025199|ref|NM_001025197|gb|U49835	0.00103	down	18.3079
A_23_P48676	NM_002863	PYGL	phosphorylase, glycogen, liver	ref|NM_002863|ens|ENST00000389850|ens|ENST00000389852|ens|ENST00000216392	0.00769	up	18.3017
A_23_P213551	NM_001892	CSNK1A1	casein kinase 1, alpha 1	ref|NM_001892|ref|NM_001025105|ens|ENST00000261798|gb|BC009186	0.0033	up	18.2979
A_24_P84970	XR_016386	KRT18P42	keratin 18 pseudogene 42	gb|XR_016386|ref|XR_018193	0.00131	down	18.2875
A_23_P39647	NM_005070	SLC4A3	solute carrier family 4, anion exchanger, member 3	ref|NM_005070|ref|NM_201574|ens|ENST00000373760|ens|ENST00000273063	0.00436	down	18.281
A_23_P347508	NM_023077	C1orf163	chromosome 1 open reading frame 163	ref|NM_023077|ens|ENST00000371538|gb|AK225041|gb|AK022501	0.00365	up	18.2796
A_24_P388570	NM_032778	MINA	MYC induced nuclear antigen	ref|NM_032778|ref|NM_001042533|ref|NM_153182|gb|AK027299	0.00208	up	18.2741
A_23_P11685	NM_024420	PLA2G4A	phospholipase A2, group IVA (cytosolic, calcium-dependent)	ref|NM_024420|ens|ENST00000367466|gb|BC114340|gb|M68874	0.00091	up	18.2692
A_23_P250379	NM_015274	MAN2B2	mannosidase, alpha, class 2B, member 2	ref|NM_015274|ens|ENST00000285599|gb|AB023152|gb|AK075246	0.00111	down	18.2692
A_24_P15630	NM_198521	C12orf42	chromosome 12 open reading frame 42	ref|NM_198521|ens|ENST00000315192|gb|AK058052|thc|THC2490002	0.00791	down	18.2613
A_24_P339416	NM_014960	ARSG	arylsulfatase G	ref|NM_014960|ens|ENST00000355179|gb|AY358380|gb|BC012375	0.00241	up	18.2561
A_23_P159764	NM_024921	POF1B	premature ovarian failure, 1B	ref|NM_024921|gb|AF309774|gb|AK026445|gb|AK025039	0.00478	down	18.2534
A_32_P93782	NM_000987	RPL26	ribosomal protein L26	ref|NM_000987|ens|ENST00000325668|ens|ENST00000293842|ens|ENST00000334048	0.00605	up	18.2396
A_23_P126735	NM_000572	IL10	interleukin 10	ref|NM_000572|ens|ENST00000367099|gb|M57627|gb|BC022315	0.00504	up	18.232
A_23_P44154	NM_198196	CD96	CD96 molecule	ref|NM_198196|ref|NM_005816|ens|ENST00000283285|ens|ENST00000352690	0.00698	down	18.232
A_24_P172768	NM_004124	GMFB	glia maturation factor, beta	ref|NM_004124|ens|ENST00000358056|gb|AB001106|gb|AB209240	0.0033	up	18.2243
A_23_P98085	NM_000314	PTEN	phosphatase and tensin homolog	ref|NM_000314|ens|ENST00000371953|gb|U92436|gb|BC038293	0.00095	up	18.2199
A_23_P159237	NM_005293	GPR20	G protein-coupled receptor 20	ref|NM_005293|gb|AB209066|thc|THC2604553	0.00218	down	18.216
A_32_P233911	BI826226	NA	NA	gb|BI826226|thc|THC2645708	0.00382	down	18.2159
A_23_P114656	NM_004964	HDAC1	histone deacetylase 1	ref|NM_004964|ens|ENST00000373548|ens|ENST00000373541|gb|D50405	0.00064	down	18.2099
A_24_P221445	NM_181354	OXR1	oxidation resistance 1	ref|NM_181354|gb|BC032710|ens|ENST00000312046|ens|ENST00000297447	0.0011	up	18.209
A_24_P132383	NM_175571	GIMAP8	GTPase, IMAP family member 8	ref|NM_175571|ens|ENST00000307271|gb|AK098320|gb|AK057969	0.00183	down	18.209
A_23_P79622	NM_181342	FKBP7	FK506 binding protein 7	ref|NM_181342|gb|AY353086|ens|ENST00000350591|ens|ENST00000233092	0.00361	up	18.202
A_23_P206107	AL117482	ULK3	unc-51-like kinase 3 (C. elegans)	gb|AL117482|ens|ENST00000268074|gb|AL360256|gb|BC036117	0.00024	down	18.2008
A_23_P34597	NM_001785	CDA	cytidine deaminase	ref|NM_001785|gb|AY634312|ens|ENST00000375071|gb|S52873	0.00368	up	18.1975
A_23_P79703	NM_000183	HADHB	hydroxyacyl-Coenzyme A dehydrogenase/3-ketoacyl-Coenzyme A thiolase/enoyl-Coenzyme A hydratase (trifunctional protein), beta subunit	ref|NM_000183|ens|ENST00000317799|ens|ENST00000317815|gb|BC066963	0.00439	up	18.1818
A_24_P419058	AB075823	GPR98	G protein-coupled receptor 98	gb|AB075823|thc|NP435324	0.00582	down	18.1818
A_24_P159227	NM_020168	PAK6	p21 protein (Cdc42/Rac)-activated kinase 6	ref|NM_020168|gb|BC035596|ens|ENST00000260404|gb|AK131522	0.00806	down	18.1818
A_24_P941427	AB011119	NA	NA	gb|AB011119	0.00629	down	18.1669
A_32_P210038	BC021677	NA	NA	gb|BC021677|thc|THC2670809	0.00021	down	18.1649
A_24_P910605	BX339253	ZNF131	zinc finger protein 131	gb|BX339253|gb|AW269450	0.0005	down	18.1603
A_24_P128442	NM_152380	TBX15	T-box 15	ref|NM_152380|gb|AK127536|ens|ENST00000207157|ens|ENST00000369429	0.00775	down	18.1563
A_24_P170613	AF487905	MLL	myeloid/lymphoid or mixed-lineage leukemia (trithorax homolog, Drosophila)	gb|AF487905|thc|THC2498539	0.00066	down	18.1519
A_23_P502731	NM_006902	PRRX1	paired related homeobox 1	ref|NM_006902|ref|NM_022716|ens|ENST00000367760|ens|ENST00000239461	0.00151	down	18.1487
A_32_P230547	NM_033407	DOCK7	dedicator of cytokinesis 7	ref|NM_033407|gb|AK125049|ens|ENST00000340370|ens|ENST00000251157	<0.00001	up	18.1387
A_23_P101297	NM_012155	EML2	echinoderm microtubule associated protein like 2	ref|NM_012155|gb|BC032630|ens|ENST00000245925|gb|AB209773	0.00083	down	18.1308
A_23_P141429	NM_016428	ABI3	ABI family, member 3	ref|NM_016428|ens|ENST00000225941|gb|AL136709|gb|BC007780	0.00464	down	18.1239
A_23_P310317	NM_001008656	TCOF1	Treacher Collins-Franceschetti syndrome 1	ref|NM_001008656|ref|NM_000356|ens|ENST00000323668|ens|ENST00000377797	0.00499	down	18.1074
A_24_P415959	NM_001969	EIF5	eukaryotic translation initiation factor 5	ref|NM_001969|ref|NM_183004|ens|ENST00000216554|gb|AK026933	0.00469	up	18.1053
A_24_P409681	A_24_P409681	NA	NA		0.00672	up	18.1041
A_23_P49597	NM_020360	PLSCR3	phospholipid scramblase 3	ref|NM_020360|ens|ENST00000324822|gb|AK075188|gb|AF159442	0.00739	down	18.0995
A_32_P16854	NM_015391	ANAPC13	anaphase promoting complex subunit 13	ref|NM_015391|ens|ENST00000333956|ens|ENST00000354910|gb|AF086169	0.00062	up	18.0894
A_23_P127964	NM_199418	PRCP	prolylcarboxypeptidase (angiotensinase C)	ref|NM_199418|ref|NM_005040|ens|ENST00000313010|gb|AK090847	0.00812	up	18.0851
A_23_P258837	NM_032790	ORAI1	ORAI calcium release-activated calcium modulator 1	ref|NM_032790|gb|BC075831|ens|ENST00000330079|gb|BC104633	0.00067	down	18.0832
A_24_P294703	NM_130809	PRRC1	proline-rich coiled-coil 1	ref|NM_130809|gb|AJ441110|gb|AJ515158|ens|ENST00000296666	0.00654	up	18.0832
A_23_P30995	NM_016230	CYB5R4	cytochrome b5 reductase 4	ref|NM_016230|gb|BC025380|ens|ENST00000369678|ens|ENST00000369681	0.00222	up	18.0812
A_23_P333330	BC005015	ZDHHC24	zinc finger, DHHC-type containing 24	gb|BC005015|thc|THC2496534|thc|THC2505799	0.00773	down	18.0685
A_24_P263297	ENST00000369783	NA	NA	Protein FAM26A. [Source:Uniprot/SWISSPROT;Acc:Q86XJ0] [ENST00000369783]	0.00322	up	18.0679
A_24_P487901	AK055795	NA	NA	gb|AK055795|thc|THC2519410	0.0058	down	18.0673
A_23_P25235	NM_080387	CLEC4D	C-type lectin domain family 4, member D	ref|NM_080387|ens|ENST00000299665|gb|DQ891244|gb|DQ894429	0.00021	up	18.0668
A_23_P48897	AF011794	CCPG1	cell cycle progression 1	gb|AF011794|gb|AF212228|thc|THC2479879	0.00847	up	18.064
A_23_P103951	A_23_P103951	NA	NA		0.00169	up	18.0531
A_32_P47778	A_32_P47778	NA	NA		0.00818	down	18.0486
A_24_P127641	ENST00000378953	NA	NA	ens|ENST00000378953|gb|AK128882|thc|THC2637908	0.00366	down	18.0456
A_32_P74391	NM_178460	SIRPD	signal-regulatory protein delta	ref|NM_178460|ens|ENST00000381623|ens|ENST00000381621|gb|BC033502	0.00034	up	18.0427
A_23_P135499	NM_013943	CLIC4	chloride intracellular channel 4	ref|NM_013943|ens|ENST00000374379|gb|AL117424|gb|AL080061	0.00199	up	18.0381
A_32_P11096	NM_203303	ZCCHC13	zinc finger, CCHC domain containing 13	ref|NM_203303|ens|ENST00000339534|ens|ENST00000373486|gb|BC021176	0.0009	down	18.0187
A_24_P41551	XR_018025	NA	NA	gb|XR_018025|ref|XR_017419|ref|XR_018596	0.00742	up	18.0178
A_24_P937182	THC2565113	NA	NA	thc|THC2565113|gb|BF851022|gb|BF996345	0.00128	down	18.0175
A_23_P29985	AK022953	C4orf23	chromosome 4 open reading frame 23	gb|AK022953|thc|THC2483039	0.00363	down	18.0114
A_23_P386964	NM_152543	C4orf45	chromosome 4 open reading frame 45	ref|NM_152543|ens|ENST00000296528|gb|AK058100|thc|THC2485577	0.00049	up	18.001
A_32_P78036	BC032874	NA	NA	gb|BC032874|thc|THC2610025	0.00562	down	17.9897
A_23_P313512	NM_152640	DCP1B	DCP1 decapping enzyme homolog B (S. cerevisiae)	ref|NM_152640|ens|ENST00000280665|gb|BC043437|gb|AY146652	0.00007	down	17.9856
A_23_P3014	NM_005615	RNASE6	ribonuclease, RNase A family, k6	ref|NM_005615|ens|ENST00000304677|gb|BC020848|thc|THC2786468	0.00738	up	17.982
A_23_P149892	NM_018590	CSGALNACT2	chondroitin sulfate N-acetylgalactosaminyltransferase 2	ref|NM_018590|gb|BX640967|ens|ENST00000374466|gb|AB090811	0.00095	up	17.9775
A_23_P364517	NM_021237	SELK	selenoprotein K	ref|NM_021237|gb|AF085359|ens|ENST00000231908|gb|AF537132	0.00484	up	17.9693
A_23_P168388	NM_175571	GIMAP8	GTPase, IMAP family member 8	ref|NM_175571|ens|ENST00000307271|gb|AK098320|gb|AK057969	0.00406	down	17.968
A_23_P6914	NM_022776	OSBPL11	oxysterol binding protein-like 11	ref|NM_022776|gb|BC065213|ens|ENST00000296220|gb|AF392454	<0.00001	up	17.9634
A_24_P898583	NM_003449	TRIM26	tripartite motif-containing 26	ref|NM_003449|gb|BC024039|ens|ENST00000327357|ens|ENST00000354738	0.00286	down	17.9541
A_23_P24157	NM_032709	C10orf33	chromosome 10 open reading frame 33	ref|NM_032709|ens|ENST00000370575|gb|DQ893418|gb|DQ896787	0.00573	down	17.9386
A_23_P104471	NM_001007271	DUSP13	dual specificity phosphatase 13	ref|NM_001007271|ref|NM_001007274|ref|NM_001007273|ref|NM_001007275	0.00098	up	17.9304
A_23_P124632	AF067420	IGHA1	immunoglobulin heavy constant alpha 1	gb|AF067420|thc|THC2481707	0.00158	up	17.9261
A_32_P181166	NM_174896	C1orf162	chromosome 1 open reading frame 162	ref|NM_174896|ens|ENST00000343534|ens|ENST00000369718|gb|AK123160	0.00243	up	17.9172
A_23_P133506	NM_024872	DOK3	docking protein 3	ref|NM_024872|ens|ENST00000357198|gb|AK026223|thc|THC2497732	0.00234	up	17.9153
A_24_P179351	NM_003295	TPT1	tumor protein, translationally-controlled 1	ref|NM_003295|gb|BC022436|gb|BC040008|ens|ENST00000379060	0.00187	up	17.9141
A_32_P142149	BC007784	NA	NA	gb|BC007784|thc|THC2511877	0.00838	down	17.9104
A_24_P392414	A_24_P392414	NA	NA		0.0032	down	17.9073
A_24_P34231	AF132204	NA	NA	gb|AF132204	0.00231	down	17.9045
A_23_P251051	NM_181832	NF2	neurofibromin 2 (merlin)	ref|NM_181832|ref|NM_016418|ref|NM_000268|ref|NM_181829	0.00164	down	17.9028
A_32_P14894	NM_001014	RPS10	ribosomal protein S10	ref|NM_001014|ens|ENST00000326199|ens|ENST00000374053|ens|ENST00000344700	0.00039	up	17.8932
A_23_P70849	NM_000603	NOS3	nitric oxide synthase 3 (endothelial cell)	ref|NM_000603|ens|ENST00000297494|gb|AF400594|gb|BC069465	0.00054	down	17.8899
A_24_P251221	NM_006243	PPP2R5A	protein phosphatase 2, regulatory subunit B', alpha isoform	ref|NM_006243|ens|ENST00000261461|gb|L42373|gb|BC022474	0.00664	up	17.8849
A_23_P162540	NM_031954	KCTD10	potassium channel tetramerisation domain containing 10	ref|NM_031954|gb|BC040062|ens|ENST00000228495|gb|AB209358	0.00588	down	17.8744
A_23_P98085	NM_000314	PTEN	phosphatase and tensin homolog	ref|NM_000314|ens|ENST00000371953|gb|U92436|gb|BC038293	0.00194	up	17.8694
A_24_P398950	NM_018671	UNC45A	unc-45 homolog A (C. elegans)	ref|NM_018671|ref|NM_001039675|gb|BC045635|ens|ENST00000268159	0.00602	down	17.8571
A_24_P782084	AI961429	UQCRC2	ubiquinol-cytochrome c reductase core protein II	gb|AI961429	0.00845	down	17.8495
A_23_P214587	NM_003449	TRIM26	tripartite motif-containing 26	ref|NM_003449|gb|BC024039|ens|ENST00000327357|ens|ENST00000354738	<0.00001	down	17.8357
A_23_P252062	NM_138711	PPARG	peroxisome proliferator-activated receptor gamma	ref|NM_138711|ref|NM_138712|ref|NM_015869|ref|NM_005037	0.00777	up	17.8335
A_23_P9997	A_23_P9997	NA	NA		0.00064	up	17.8284
A_24_P712350	NM_001821	CHML	choroideremia-like (Rab escort protein 2)	ref|NM_001821|ens|ENST00000366553|gb|AK023423|gb|AK000933	0.00618	up	17.8275
A_24_P921446	BC017854	EMP1	epithelial membrane protein 1	gb|BC017854|thc|THC2527913	0.00407	up	17.8259
A_32_P86820	THC2741548	NA	NA	thc|THC2741548	0.00784	down	17.8197
A_24_P49447	AB037853	KIAA1432	KIAA1432	gb|AB037853|ens|ENST00000276898|gb|AK074150|gb|BC030576	0.0013	up	17.7914
A_23_P406135	NM_015662	IFT172	intraflagellar transport 172 homolog (Chlamydomonas)	ref|NM_015662|ens|ENST00000260570|ens|ENST00000379763|gb|BC008024	0.00845	down	17.7914
A_24_P185516	THC2662610	NA	NA	thc|THC2662610	0.00267	up	17.7885
A_24_P607645	A_24_P607645	NA	NA		0.00202	up	17.788
A_24_P926813	A_24_P926813	NA	NA		0.00706	down	17.7793
A_23_P144384	NM_017423	GALNT7	UDP-N-acetyl-alpha-D-galactosamine:polypeptide N-acetylgalactosaminyltransferase 7 (GalNAc-T7)	ref|NM_017423|ens|ENST00000265000|gb|AJ002744|gb|BC020541	0.00032	up	17.7778
A_23_P203882	NM_002429	MMP19	matrix metallopeptidase 19	ref|NM_002429|gb|U38431|gb|BC050368|gb|BC030206	0.00383	up	17.7742
A_32_P198706	THC2709584	NA	NA	thc|THC2709584|gb|AW833935|gb|BF887040	0.00755	down	17.7718
A_24_P593733	XR_018459	NA	NA	gb|XR_018459|ref|XR_016210	0.00628	down	17.77
A_23_P258124	NM_012279	ZNF346	zinc finger protein 346	ref|NM_012279|gb|AK024650|thc|THC2463483|gb|BG178235	0.0064	down	17.7665
A_23_P55356	NM_182566	VMO1	vitelline membrane outer layer 1 homolog (chicken)	ref|NM_182566|gb|BC104195|gb|BC038467|ens|ENST00000328739	0.00018	up	17.761
A_23_P433753	NM_212472	PRKAR1A	protein kinase, cAMP-dependent, regulatory, type I, alpha (tissue specific extinguisher 1)	ref|NM_212472|ref|NM_212471|ref|NM_002734|ens|ENST00000358598	0.00019	up	17.7551
A_23_P17998	NM_005524	HES1	hairy and enhancer of split 1, (Drosophila)	ref|NM_005524|ens|ENST00000232424|gb|AF264785|gb|AK000415	0.00601	down	17.7517
A_23_P165676	BC017694	FAM128B	family with sequence similarity 128, member B	gb|BC017694|gb|AK024408|gb|AK090531|gb|AX746496	<0.00001	down	17.7489
A_32_P178045	THC2689164	NA	NA	thc|THC2689164	0.0072	down	17.7458
A_24_P934952	D31828	NA	NA	gb|D31828	0.00336	down	17.7446
A_24_P344295	NM_015528	RNF167	ring finger protein 167	ref|NM_015528|gb|AL834284|gb|BC010139|ens|ENST00000381350	0.00152	down	17.7419
A_23_P38167	NM_022036	GPRC5C	G protein-coupled receptor, family C, group 5, member C	ref|NM_022036|ref|NM_018653|gb|BC110848|gb|BC004925	0.00038	up	17.7394
A_23_P323761	NM_025228	TRAF3IP3	TRAF3 interacting protein 3	ref|NM_025228|gb|AK122792|ens|ENST00000010338|ens|ENST00000367024	<0.00001	down	17.7391
A_23_P16944	NM_001006946	SDC1	syndecan 1	ref|NM_001006946|ref|NM_002997|ens|ENST00000381150|ens|ENST00000254351	0.00233	up	17.7158
A_23_P211106	NM_017438	SETD4	SET domain containing 4	ref|NM_017438|gb|AK095215|gb|AF391112|gb|BC036556	0.00377	down	17.7143
A_23_P8848	NM_018250	INTS9	integrator complex subunit 9	ref|NM_018250|gb|BC025267|ens|ENST00000265614|gb|AK225072	0.00304	down	17.7122
A_23_P95353	NM_014678	SAPS2	SAPS domain family, member 2	ref|NM_014678|gb|AB014585|ens|ENST00000359139|thc|THC2585537	0.00743	down	17.7099
A_23_P119943	NM_000597	IGFBP2	insulin-like growth factor binding protein 2, 36kDa	ref|NM_000597|ens|ENST00000233809|gb|AB209509|gb|X16302	0.00298	up	17.701
A_23_P252664	U27333	FUT6	fucosyltransferase 6 (alpha (1,3) fucosyltransferase)	gb|U27333|gb|U27335|gb|U27337|thc|THC2482527	0.00011	down	17.6991
A_23_P207911	NM_016113	TRPV2	transient receptor potential cation channel, subfamily V, member 2	ref|NM_016113|ens|ENST00000338560|gb|AK001896|gb|BC051305	0.00123	down	17.6991
A_24_P182539	ENST00000317868	NA	NA	ens|ENST00000317868|ens|ENST00000245874|ens|ENST00000371120|gb|AK027773	0.00316	up	17.6912
A_24_P66545	ENST00000296343	NA	NA	ens|ENST00000296343|ens|ENST00000389665|gb|BC014173|thc|THC2505244	0.00062	down	17.6671
A_32_P27041	A18658	NA	NA	gb|A18658|gb|AI819757|gb|AW299939|gb|AA452069	0.00015	up	17.6615
A_32_P140742	NM_001040710	C2orf84	chromosome 2 open reading frame 84	ref|NM_001040710|gb|BC050462|ens|ENST00000295150|gb|AK055413	0.00804	up	17.6489
A_32_P181020	NM_005510	DOM3Z	dom-3 homolog Z (C. elegans)	ref|NM_005510|gb|BC071651|ens|ENST00000337523|ens|ENST00000383171	0.00584	down	17.6471
A_24_P639701	AY062331	NA	NA	gb|AY062331|gb|L33040|gb|L37308|gb|L37309	0.00809	up	17.6385
A_23_P503115	NM_021574	BCR	breakpoint cluster region	ref|NM_021574|ref|NM_004327|ens|ENST00000305877|ens|ENST00000359540	0.00711	down	17.6378
A_23_P8119	NM_152735	ZBTB9	zinc finger and BTB domain containing 9	ref|NM_152735|ens|ENST00000293748|ens|ENST00000362090|gb|AB067525	0.00072	down	17.6322
A_24_P156295	NM_018677	ACSS2	acyl-CoA synthetase short-chain family member 2	ref|NM_018677|ref|NM_001076552|gb|AK092281|gb|BC012172	0.00006	up	17.6204
A_24_P93855	NM_001012426	FOXP4	forkhead box P4	ref|NM_001012426|ref|NM_001012427|ref|NM_138457|ens|ENST00000307972	0.00403	down	17.6152
A_23_P60657	NM_015203	RPRD2	regulation of nuclear pre-mRNA domain containing 2	ref|NM_015203|gb|AK056707|gb|AB007929|gb|BC045623	0.00716	down	17.6152
A_23_P169978	NM_020747	ZNF608	zinc finger protein 608	ref|NM_020747|gb|CR749624|ens|ENST00000306315|gb|BC131507	0.00105	up	17.614
A_23_P208706	NM_138764	BAX	BCL2-associated X protein	ref|NM_138764|ref|NM_138761|ref|NM_138765|ref|NM_138763	<0.00001	down	17.6113
A_32_P131640	NM_173078	SLITRK4	SLIT and NTRK-like family, member 4	ref|NM_173078|ens|ENST00000338017|ens|ENST00000356928|gb|AK092016	0.00331	up	17.6056
A_24_P202581	NM_199002	ARHGEF1	Rho guanine nucleotide exchange factor (GEF) 1	ref|NM_199002|ref|NM_004706|ref|NM_198977|gb|BC067262	0.00034	down	17.6
A_24_P370471	NM_031482	ATG10	ATG10 autophagy related 10 homolog (S. cerevisiae)	ref|NM_031482|ens|ENST00000282185|ens|ENST00000355178|gb|AF318326	0.00517	up	17.5957
A_24_P276853	NM_001037533	GON4L	gon-4-like (C. elegans)	ref|NM_001037533|gb|AB046826|gb|AY335491|ens|ENST00000368331	0.00403	down	17.5953
A_23_P147224	ENST00000390594	NA	NA	ens|ENST00000390594|ens|ENST00000390622|ens|ENST00000283694|ens|ENST00000302092	0.00464	up	17.5952
A_23_P26375	NM_022914	ACD	adrenocortical dysplasia homolog (mouse)	ref|NM_022914|ref|NM_001082486|gb|BC016904|ens|ENST00000219251	0.00427	down	17.5904
A_24_P813550	ENST00000390630	NA	NA	ens|ENST00000390630|ens|ENST00000390616|ens|ENST00000390629|ens|ENST00000390619	0.0014	up	17.5884
A_24_P333494	NM_018994	FBXO42	F-box protein 42	ref|NM_018994|gb|BC006174|gb|BC043410|gb|BC032439	0.0038	down	17.5879
A_23_P7697	NM_003100	SNX2	sorting nexin 2	ref|NM_003100|ens|ENST00000379516|gb|AF043453|gb|AK023716	<0.00001	up	17.5824
A_24_P85045	NM_015723	PNPLA8	patatin-like phospholipase domain containing 8	ref|NM_015723|gb|BC032999|ens|ENST00000257694|gb|AF263947	0.00495	up	17.5795
A_32_P22989	A_32_P22989	NA	NA		0.00205	down	17.5781
A_32_P100109	NM_004726	NA	NA	ref|NM_004726|ref|NM_001080975|ens|ENST00000380064|gb|AK097484	0.00054	up	17.5718
A_24_P933580	AB063115	NAV2	neuron navigator 2	gb|AB063115|gb|AJ488205|thc|NP591066|thc|THC2746412	0.00097	down	17.5713
A_23_P103070	NM_003405	YWHAH	tyrosine 3-monooxygenase/tryptophan 5-monooxygenase activation protein, eta polypeptide	ref|NM_003405|gb|BC003047|ens|ENST00000248975|gb|X78138	0.00301	up	17.5695
A_24_P418717	NM_004329	BMPR1A	bone morphogenetic protein receptor, type IA	ref|NM_004329|ens|ENST00000224764|ens|ENST00000372037|gb|DQ891524	0.00703	down	17.5676
A_23_P500998	NM_152739	HOXA9	homeobox A9	ref|NM_152739|ens|ENST00000343483|ens|ENST00000354032|ens|ENST00000242050	0.00152	up	17.5549
A_23_P53081	NM_020896	OSBPL5	oxysterol binding protein-like 5	ref|NM_020896|ref|NM_145638|ens|ENST00000263650|ens|ENST00000348039	0.00438	down	17.5532
A_23_P76918	NM_012460	TIMM9	translocase of inner mitochondrial membrane 9 homolog (yeast)	ref|NM_012460|ens|ENST00000216463|gb|AK000666|gb|BC054875	0.00743	up	17.551
A_24_P410086	NM_032627	SSBP4	single stranded DNA binding protein 4	ref|NM_032627|ref|NM_001009998|ens|ENST00000270061|ens|ENST00000348495	0.00244	down	17.5439
A_23_P141484	NM_018182	C17orf63	chromosome 17 open reading frame 63	ref|NM_018182|ref|NM_001077498|gb|AK001562|thc|THC2461997	0.00161	down	17.5418
A_24_P396994	NM_001690	ATP6V1A	ATPase, H+ transporting, lysosomal 70kDa, V1 subunit A	ref|NM_001690|ens|ENST00000273398|gb|BC012169|gb|AF113129	0.00142	up	17.5325
A_32_P188752	AK129584	LOC100134713	hypothetical protein LOC100134713	gb|AK129584|gb|BX356049	0.00001	down	17.5313
A_23_P433369	AL117511	HEATR5A	HEAT repeat containing 5A	gb|AL117511|gb|CN478699|thc|THC2491277	0.00231	up	17.5258
A_24_P731648	NM_004694	SLC16A6	solute carrier family 16, member 6 (monocarboxylic acid transporter 7)	ref|NM_004694|ens|ENST00000327268|ens|ENST00000344066|gb|AX750577	<0.00001	up	17.5154
A_23_P316381	NM_003501	ACOX3	acyl-Coenzyme A oxidase 3, pristanoyl	ref|NM_003501|gb|BC017053|ens|ENST00000200383|ens|ENST00000356406	0.00239	down	17.5123
A_23_P62868	NM_001001998	EXOSC10	exosome component 10	ref|NM_001001998|ref|NM_002685|ens|ENST00000304457|ens|ENST00000376936	0.00637	down	17.5115
A_23_P204304	NM_030667	PTPRO	protein tyrosine phosphatase, receptor type, O	ref|NM_030667|ref|NM_002848|ref|NM_030671|ref|NM_030670	0.00009	up	17.5053
A_32_P220372	AK125452	NA	NA	gb|AK125452|gb|AK094509|thc|THC2611809	0.0051	down	17.5028
A_32_P226646	THC2661917	NA	NA	thc|THC2661917	0.0084	up	17.4963
A_24_P127621	A_24_P127621	NA	NA		0.00593	up	17.4908
A_32_P50005	NM_001918	DBT	dihydrolipoamide branched chain transacylase E2	ref|NM_001918|gb|BX097005|gb|AW961151	0.00221	down	17.4897
A_24_P829181	BC034002	FLJ32255	hypothetical protein LOC643977	gb|BC034002|gb|AK056817|gb|AK097396|gb|XR_018477	0.00188	down	17.479
A_24_P199655	NM_138959	VANGL1	vang-like 1 (van gogh, Drosophila)	ref|NM_138959|gb|AF481859|ens|ENST00000355485|ens|ENST00000310260	0.00297	down	17.4789
A_23_P80763	BC017572	PVRL3	poliovirus receptor-related 3	gb|BC017572|gb|AL050071|thc|THC2472871	0.00798	down	17.4782
A_24_P8318	NM_014423	AFF4	AF4/FMR2 family, member 4	ref|NM_014423|gb|BC063007|gb|BC025700|ens|ENST00000339039	0.00189	down	17.4757
A_24_P161463	AY513723	C20orf199	chromosome 20 open reading frame 199	gb|AY513723|gb|AY513722|ens|ENST00000326677|ens|ENST00000371743	0.00126	up	17.4734
A_23_P157435	NM_015878	AZIN1	antizyme inhibitor 1	ref|NM_015878|ref|NM_148174|ens|ENST00000347770|ens|ENST00000337198	0.0064	up	17.4603
A_23_P38987	NM_014516	CNOT3	CCR4-NOT transcription complex, subunit 3	ref|NM_014516|ens|ENST00000221232|ens|ENST00000358389|gb|AB014591	0.00777	down	17.4157
A_23_P87238	NM_006512	SAA4	serum amyloid A4, constitutive	ref|NM_006512|ens|ENST00000278222|gb|CR541758|gb|M81349	0.00599	up	17.4134
A_32_P332320	BC010126	NOS1	nitric oxide synthase 1 (neuronal)	gb|BC010126|thc|THC2520308	0.0038	down	17.4108
A_24_P204675	NR_002603	LOC440353	nuclear pore complex interacting protein pseudogene	ref|NR_002603|gb|BC094882|gb|BC036263|ens|ENST00000344223	0.00698	down	17.407
A_24_P798709	AK025015	NPAL2	NIPA-like domain containing 2	gb|AK025015|thc|THC2514696	0.0063	up	17.4026
A_23_P110253	NM_000222	KIT	v-kit Hardy-Zuckerman 4 feline sarcoma viral oncogene homolog	ref|NM_000222|gb|BC071593|ens|ENST00000288135|ens|ENST00000381345	0.00414	up	17.3965
A_24_P406006	NM_024830	LPCAT1	lysophosphatidylcholine acyltransferase 1	ref|NM_024830|gb|AK123603|ens|ENST00000283415|gb|AF052162	0.00131	down	17.3913
A_23_P166508	BC038245	NA	NA	gb|BC038245|thc|THC2605722|thc|THC2662729|thc|THC2710724	0.00061	down	17.3826
A_23_P150510	NM_153450	MED19	mediator complex subunit 19	ref|NM_153450|gb|AY148462|ens|ENST00000337672|gb|U92995	0.00634	down	17.3825
A_24_P378928	NM_005160	ADRBK2	adrenergic, beta, receptor kinase 2	ref|NM_005160|gb|BC036797|ens|ENST00000324198|thc|THC2489879	0.00228	up	17.3807
A_23_P110811	NM_001867	COX7C	cytochrome c oxidase subunit VIIc	ref|NM_001867|ens|ENST00000247655|ens|ENST00000380124|gb|X16560	0.00707	up	17.3729
A_24_P65121	NM_001040655	TTC23	tetratricopeptide repeat domain 23	ref|NM_001040655|ref|NM_001040660|ref|NM_022905|ref|NM_001040656	0.00752	down	17.3722
A_24_P115621	ENST00000373218	NA	NA	ens|ENST00000373218|gb|CR627373|thc|THC2506714	0.00296	down	17.3643
A_24_P209455	NM_018326	GIMAP4	GTPase, IMAP family member 4	ref|NM_018326|ens|ENST00000255945|gb|BC020657|gb|AK001972	0.00096	down	17.3611
A_24_P590547	BX640624	IGHG1	immunoglobulin heavy constant gamma 1 (G1m marker)	gb|BX640624|gb|BC092518|gb|AK097306|gb|BX647160	0.0033	up	17.3499
A_23_P51009	NM_002491	NDUFB3	NADH dehydrogenase (ubiquinone) 1 beta subcomplex, 3, 12kDa	ref|NM_002491|ens|ENST00000237889|gb|CR456924|gb|DQ891431	0.00465	up	17.349
A_23_P210515	NM_020967	NCOA5	nuclear receptor coactivator 5	ref|NM_020967|gb|BC056872|ens|ENST00000290231|ens|ENST00000372291	0.0031	down	17.341
A_32_P45087	A_32_P45087	NA	NA		0.0066	up	17.341
A_23_P207939	NM_181482	C18orf1	chromosome 18 open reading frame 1	ref|NM_181482|ref|NM_001003674|ref|NM_001003675|ref|NM_181481	0.00008	up	17.3393
A_24_P127021	NM_003932	ST13	suppression of tumorigenicity 13 (colon carcinoma) (Hsp70 interacting protein)	ref|NM_003932|ref|NR_002199|ref|NR_002183|gb|BC107148	0.00181	down	17.3375
A_23_P38190	NM_139280	ORMDL3	ORM1-like 3 (S. cerevisiae)	ref|NM_139280|gb|BC017087|ens|ENST00000304046|gb|AY357943	0.00374	down	17.3352
A_23_P124084	NM_005576	LOXL1	lysyl oxidase-like 1	ref|NM_005576|ens|ENST00000261921|gb|L21186|gb|BC068542	0.00791	down	17.3311
A_23_P98605	NM_015853	UBXN1	UBX domain protein 1	ref|NM_015853|gb|BC040129|ens|ENST00000294119|ens|ENST00000301935	0.00344	down	17.3267
A_24_P560088	BI561420	NA	NA	gb|BI561420	0.0036	down	17.3099
A_24_P921050	AF350419	NA	NA	gb|AF350419|thc|NP435817	0.00085	up	17.3068
A_23_P151970	NM_015322	FEM1B	fem-1 homolog b (C. elegans)	ref|NM_015322|gb|AK098620|gb|BC010122|gb|BC014558	0.0018	up	17.3038
A_23_P14734	NM_015920	RPS27L	ribosomal protein S27-like	ref|NM_015920|ens|ENST00000330964|gb|AF070668|gb|AK024591	0.00809	up	17.2828
A_23_P139509	NM_016570	ERGIC2	ERGIC and golgi 2	ref|NM_016570|gb|BC064522|gb|AK222799|gb|AF302767	0.00228	up	17.2823
A_32_P146659	NM_001008745	NA	NA	ref|NM_001008745|ens|ENST00000378008|gb|BC023225|gb|BC028735	0.003	down	17.2754
A_32_P32207	NM_173473	C10orf104	chromosome 10 open reading frame 104	ref|NM_173473|ens|ENST00000299381|gb|AK091047|gb|AX746749	<0.00001	up	17.2727
A_23_P169331	NM_021138	TRAF2	TNF receptor-associated factor 2	ref|NM_021138|gb|AK054686|ens|ENST00000247668|ens|ENST00000371645	0.00492	down	17.2727
A_24_P54178	NM_016040	TMED5	transmembrane emp24 protein transport domain containing 5	ref|NM_016040|gb|AY359039|gb|BC070051|gb|BC016556	0.00848	up	17.2606
A_32_P72067	AK130576	ARHGAP24	Rho GTPase activating protein 24	gb|AK130576|thc|THC2485995	0.00044	up	17.2557
A_23_P38275	THC2504576	NA	NA	thc|THC2504576|gb|BG777592|gb|BU785300|gb|BI596427	0.00254	up	17.2528
A_32_P124833	XR_015772	LOC732215	similar to 3-oxoacid CoA transferase 2	gb|XR_015772|gb|BX100088	0.0052	up	17.2439
A_23_P55251	NM_002204	ITGA3	integrin, alpha 3 (antigen CD49C, alpha 3 subunit of VLA-3 receptor)	ref|NM_002204|ref|NM_005501|gb|BC043917|ens|ENST00000320031	0.00102	down	17.235
A_24_P940149	NM_199050	C2CD2	C2 calcium-dependent domain containing 2	ref|NM_199050|ref|NM_015500|gb|AB047784|ens|ENST00000299796	0.00774	down	17.2345
A_24_P317907	NM_015385	SORBS1	sorbin and SH3 domain containing 1	ref|NM_015385|ref|NM_001034954|ref|NM_001034955|ref|NM_001034956	0.00812	down	17.2336
A_23_P411806	NM_080546	SLC44A1	solute carrier family 44, member 1	ref|NM_080546|gb|AJ272365|ens|ENST00000361080|ens|ENST00000374720	0.00256	up	17.2227
A_23_P72643	NM_003816	ADAM9	ADAM metallopeptidase domain 9 (meltrin gamma)	ref|NM_003816|ref|NM_001005845|ens|ENST00000302458|ens|ENST00000379917	0.00003	up	17.2215
A_24_P342829	NM_152527	SLC16A14	solute carrier family 16, member 14 (monocarboxylic acid transporter 14)	ref|NM_152527|gb|BC065524|ens|ENST00000295190|gb|AK055356	0.00441	up	17.2188
A_23_P38894	NM_018381	C19orf66	chromosome 19 open reading frame 66	ref|NM_018381|gb|AK096142|gb|AK098062|gb|BC026180	0.00775	down	17.212
A_23_P25348	NM_025247	ACAD10	acyl-Coenzyme A dehydrogenase family, member 10	ref|NM_025247|gb|AK092356|gb|AK097425|gb|AL832043	0.00077	down	17.2093
A_23_P18342	AL133666	EPHA6	EPH receptor A6	gb|AL133666|gb|BC067287|thc|THC2612465|thc|THC2486615	0.00037	up	17.2082
A_23_P42588	NM_018384	GIMAP5	GTPase, IMAP family member 5	ref|NM_018384|gb|AK055568|ens|ENST00000358647|gb|AK002158	0.00837	down	17.2078
A_24_P862083	AK055621	NA	NA	gb|AK055621|thc|THC2609310	0.0015	up	17.1993
A_24_P289865	A_24_P289865	NA	NA		0.00767	up	17.199
A_24_P339869	NM_020727	ZNF295	zinc finger protein 295	ref|NM_020727|gb|AB041015|ens|ENST00000310826|gb|AB041014	0.0003	up	17.1983
A_23_P75033	NM_001001330	REEP3	receptor accessory protein 3	ref|NM_001001330|gb|BC057832|gb|BC010040|gb|BC038724	0.00219	up	17.1939
A_24_P917316	AF035790	NA	NA	gb|AF035790|gb|AF035791|thc|NP085923	0.00458	up	17.1926
A_23_P44363	NM_020753	CASKIN2	CASK interacting protein 2	ref|NM_020753|ens|ENST00000321617|gb|AF451976|gb|AB032965	0.00209	down	17.1788
A_23_P130293	NM_015208	ANKRD12	ankyrin repeat domain 12	ref|NM_015208|gb|AY533564|ens|ENST00000262126|ens|ENST00000383440	0.00442	up	17.1717
A_32_P64025	A_32_P64025	NA	NA		<0.00001	down	17.1685
A_23_P10442	NM_080597	OSBPL1A	oxysterol binding protein-like 1A	ref|NM_080597|ref|NM_133268|ref|NM_018030|ens|ENST00000319481	0.00133	up	17.1669
A_23_P38816	NM_130786	A1BG	alpha-1-B glycoprotein	ref|NM_130786|gb|BC035719|ens|ENST00000263100|gb|AF414429	0.0043	up	17.1642
A_23_P218654	NM_032527	NA	NA	ref|NM_032527|ref|NM_001083113|ref|NM_181485|gb|BC019338	0.00459	down	17.1642
A_23_P140423	NM_004545	NDUFB1	NADH dehydrogenase (ubiquinone) 1 beta subcomplex, 1, 7kDa	ref|NM_004545|gb|BC104672|ens|ENST00000329559|gb|BC126232	0.00735	up	17.1613
A_23_P401084	NM_174945	ZNF575	zinc finger protein 575	ref|NM_174945|gb|AK057129|ens|ENST00000314228|gb|BC043611	0.00431	down	17.1604
A_32_P35668	AA479896	LOC149832	hypothetical protein LOC149832	gb|AA479896|gb|BX095413	0.00399	down	17.1471
A_23_P56553	NM_024770	METTL8	methyltransferase like 8	ref|NM_024770|ens|ENST00000263819|ens|ENST00000375258|gb|BC025250	0.00803	up	17.1392
A_23_P160567	NM_032257	ZMYND12	zinc finger, MYND-type containing 12	ref|NM_032257|ens|ENST00000372565|gb|AK057384|gb|BC024186	0.00813	up	17.1225
A_23_P80778	NM_032839	DIRC2	disrupted in renal carcinoma 2	ref|NM_032839|gb|AK075158|ens|ENST00000261038|gb|BC033738	0.00098	up	17.1178
A_24_P213187	ENST00000330935	NA	NA	ens|ENST00000330935|gb|XR_019189|ref|XR_016330	0.00728	down	17.1176
A_23_P11685	NM_024420	PLA2G4A	phospholipase A2, group IVA (cytosolic, calcium-dependent)	ref|NM_024420|ens|ENST00000367466|gb|BC114340|gb|M68874	0.0002	up	17.0968
A_32_P211391	AL574249	NA	NA	gb|AL574249	0.00139	up	17.094
A_23_P98085	NM_000314	PTEN	phosphatase and tensin homolog	ref|NM_000314|ens|ENST00000371953|gb|U92436|gb|BC038293	0.00166	up	17.0923
A_24_P20996	BC043173	NA	NA	gb|BC043173|thc|THC2503146	0.00559	up	17.0886
A_23_P202587	NM_018330	KIAA1598	KIAA1598	ref|NM_018330|gb|BC022348|ens|ENST00000260777|gb|AK091410	0.00626	up	17.0864
A_24_P321184	XR_016155	LOC642413	similar to Cathepsin L1	gb|XR_016155|gb|XR_016426|gb|XR_016762	0.00051	up	17.0823
A_24_P928662	AF113685	NA	NA	gb|AF113685	0.00013	down	17.0799
A_24_P173088	NM_003152	STAT5A	signal transducer and activator of transcription 5A	ref|NM_003152|ens|ENST00000345506|gb|DQ891723|gb|DQ894900	0.00225	down	17.0793
A_24_P370682	NM_145214	TRIM11	tripartite motif-containing 11	ref|NM_145214|ens|ENST00000366700|ens|ENST00000284551|gb|AK097825	0.00372	down	17.0778
A_23_P150547	NM_014224	PGA3	pepsinogen 3, group I (pepsinogen A)	ref|NM_014224|ref|NM_001079807|ref|NM_001079808|gb|BC029055	0.00641	up	17.0565
A_32_P201292	BU587941	NA	NA	gb|BU587941|thc|THC2651793	0.00618	down	17.049
A_23_P3212	NM_020234	DTWD1	DTW domain containing 1	ref|NM_020234|gb|BC093073|ens|ENST00000251250|gb|DQ890877	0.00596	up	17.0487
A_24_P287075	NM_004579	MAP4K2	mitogen-activated protein kinase kinase kinase kinase 2	ref|NM_004579|gb|BC047865|ens|ENST00000294066|ens|ENST00000377355	0.00743	down	17.0367
A_23_P391238	AF426262	MCM3APAS	MCM3AP antisense RNA (non-protein coding)	gb|AF426262|ens|ENST00000327553|gb|BC002458|gb|BC047759	0.00351	down	17.036
A_23_P106761	NM_007074	CORO1A	coronin, actin binding protein, 1A	ref|NM_007074|gb|AB209221|ens|ENST00000219150|gb|BC126385	0.00816	down	17.027
A_23_P39095	NM_033377	CGB1	chorionic gonadotropin, beta polypeptide 1	ref|NM_033377|ens|ENST00000301406	0.00442	down	17.025
A_24_P33341	ENST00000360102	NA	NA	ens|ENST00000360102|gb|DQ840829	0.00655	up	17.0184
A_23_P48897	AF011794	CCPG1	cell cycle progression 1	gb|AF011794|gb|AF212228|thc|THC2479879	0.00842	up	17.0157
A_24_P384119	A_24_P384119	NA	NA		0.00358	up	17.0142
A_23_P11685	NM_024420	PLA2G4A	phospholipase A2, group IVA (cytosolic, calcium-dependent)	ref|NM_024420|ens|ENST00000367466|gb|BC114340|gb|M68874	0.00019	up	17.0124
A_23_P213863	ENST00000329540	NA	NA	ens|ENST00000329540|gb|AK001266|gb|AB067518|gb|AK096032	0.00007	down	17.0068
A_32_P40433	THC2657737	NA	NA	thc|THC2657737	0.00605	down	17.0058
A_24_P204358	NM_153824	PYCR1	pyrroline-5-carboxylate reductase 1	ref|NM_153824|ref|NM_006907|gb|BC071842|ens|ENST00000337943	0.00559	up	16.9986
A_23_P374862	NM_000574	CD55	CD55 molecule, decay accelerating factor for complement (Cromer blood group)	ref|NM_000574|gb|M30142|ens|ENST00000314754|ens|ENST00000343420	0.00167	up	16.9949
A_23_P1170	NM_174890	ANUBL1	AN1, ubiquitin-like, homolog (Xenopus laevis)	ref|NM_174890|gb|AK090704|gb|BC036186|gb|BC048968	0.00168	down	16.9858
A_32_P226009	NM_023073	C5orf42	chromosome 5 open reading frame 42	ref|NM_023073|gb|AL832176|thc|THC2465121	<0.00001	down	16.9847
A_24_P914711	BC002892	MYCNOS	v-myc myelocytomatosis viral related oncogene, neuroblastoma derived (avian) opposite strand	gb|BC002892	0.00563	down	16.9801
A_23_P340019	NM_178844	NLRC3	NLR family, CARD domain containing 3	ref|NM_178844|gb|AK090431|gb|AK074109|gb|AY601811	0.00754	down	16.9798
A_24_P301837	NM_007232	HRH3	histamine receptor H3	ref|NM_007232|gb|BC096840|gb|AB045369|gb|AK074730	0.00524	down	16.9782
A_23_P71948	NM_030767	AKNA	AT-hook transcription factor	ref|NM_030767|gb|AY703044|gb|BC055285|ens|ENST00000307564	0.00002	down	16.9767
A_24_P263793	NM_002003	FCN1	ficolin (collagen/fibrinogen domain containing) 1	ref|NM_002003|gb|D83920|ens|ENST00000371806|ens|ENST00000371807	0.00499	up	16.9745
A_23_P500251	NM_003404	YWHAB	tyrosine 3-monooxygenase/tryptophan 5-monooxygenase activation protein, beta polypeptide	ref|NM_003404|ref|NM_139323|ens|ENST00000372839|ens|ENST00000353703	0.00613	down	16.9643
A_24_P203827	ENST00000310344	NA	NA	ens|ENST00000310344|ref|XM_001126674	0.00261	up	16.9597
A_32_P20582	NM_015378	VPS13D	vacuolar protein sorting 13 homolog D (S. cerevisiae)	ref|NM_015378|ref|NM_018156|ens|ENST00000011700|ens|ENST00000356315	0.00034	down	16.9565
A_24_P418418	NM_001021	RPS17	ribosomal protein S17	ref|NM_001021|ref|NM_001080499|ens|ENST00000330339|ens|ENST00000330244	0.00379	up	16.935
A_23_P20107	NM_015917	GSTK1	glutathione S-transferase kappa 1	ref|NM_015917|gb|BC063425|gb|AM393732|gb|CR533445	0.00151	down	16.9323
A_32_P60459	AB188491	OTUD1	OTU domain containing 1	gb|AB188491|ens|ENST00000376495|ens|ENST00000298035|gb|AK096389	0.00811	up	16.9312
A_24_P766716	AK126405	CMKLR1	chemokine-like receptor 1	gb|AK126405|thc|THC2699717	0.0071	down	16.93
A_23_P83923	NM_024836	ZNF672	zinc finger protein 672	ref|NM_024836|ens|ENST00000306562|gb|AK027476|gb|BC068506	0.00828	down	16.9231
A_23_P410859	ENST00000252744	NA	NA	ens|ENST00000252744|gb|BC039438|gb|AB046797|gb|XM_035299	<0.00001	up	16.9207
A_24_P321919	NM_003870	IQGAP1	IQ motif containing GTPase activating protein 1	ref|NM_003870|ens|ENST00000268182|gb|D29640|gb|AK055054	0.00168	up	16.9154
A_24_P560519	AK024346	LOC153346	hypothetical protein LOC153346	gb|AK024346|gb|BX648997|thc|THC2551684	0.0005	up	16.9104
A_23_P107661	NM_014225	PPP2R1A	protein phosphatase 2 (formerly 2A), regulatory subunit A, alpha isoform	ref|NM_014225|gb|AK091387|ens|ENST00000322088|gb|J02902	0.00098	down	16.9065
A_24_P370670	BC029439	ZMYM6	zinc finger, MYM-type 6	gb|BC029439|ens|ENST00000373340|ens|ENST00000373337|gb|AF055470	0.00314	down	16.8999
A_23_P412562	NM_174896	C1orf162	chromosome 1 open reading frame 162	ref|NM_174896|ens|ENST00000343534|ens|ENST00000369718|gb|DQ891976	0.00101	up	16.8934
A_23_P46606	NM_014873	LPGAT1	lysophosphatidylglycerol acyltransferase 1	ref|NM_014873|ens|ENST00000366996|ens|ENST00000366997|gb|BC034621	0.00014	up	16.8878
A_23_P250042	NM_016275	SELT	selenoprotein T	ref|NM_016275|gb|BC026350|ens|ENST00000361622|gb|AF195141	0.00568	up	16.8831
A_23_P213718	NM_014402	UQCRQ	ubiquinol-cytochrome c reductase, complex III subunit VII, 9.5kDa	ref|NM_014402|ens|ENST00000378665|ens|ENST00000378667|ens|ENST00000378670	0.00561	up	16.8652
A_23_P60240	NM_032634	PIGO	phosphatidylinositol glycan anchor biosynthesis, class O	ref|NM_032634|ref|NM_152850|gb|AL833956|gb|BC065282	0.00669	down	16.8498
A_24_P408767	NM_182702	TESSP2	testis serine protease 2	ref|NM_182702|ens|ENST00000319346|gb|AJ544583|gb|BC140233	0.00353	down	16.8491
A_23_P18505	NM_207123	GAB1	GRB2-associated binding protein 1	ref|NM_207123|ref|NM_002039|ens|ENST00000262995|ens|ENST00000262994	0.00728	up	16.8478
A_23_P21249	AB063751	IGHG1	immunoglobulin heavy constant gamma 1 (G1m marker)	gb|AB063751|gb|DQ100840|gb|EF175385|gb|DQ065623	0.00383	up	16.8391
A_23_P20363	NM_016010	FAM164A	family with sequence similarity 164, member A	ref|NM_016010|ens|ENST00000263849|gb|AK024711|gb|AF151820	<0.00001	up	16.8325
A_23_P254917	NM_006149	LGALS4	lectin, galactoside-binding, soluble, 4	ref|NM_006149|ens|ENST00000307751|gb|BT007032|gb|CR536544	0.00401	down	16.8263
A_23_P113056	A_23_P113056	NA	NA		0.00216	up	16.8188
A_23_P310532	NM_138358	C19orf52	chromosome 19 open reading frame 52	ref|NM_138358|ens|ENST00000270502|gb|BC005075|gb|BC011833	0.00665	down	16.8103
A_32_P85978	AK074191	ZNF414	zinc finger protein 414	gb|AK074191|gb|AK225034|thc|THC2544065|thc|THC2500206	0.00358	down	16.8
A_23_P318800	NM_001050	SSTR2	somatostatin receptor 2	ref|NM_001050|ens|ENST00000357585|gb|E11322|gb|BT019926	0.00673	down	16.7957
A_32_P117723	NM_199040	NUDT4	nudix (nucleoside diphosphate linked moiety X)-type motif 4	ref|NM_199040|ref|NM_019094|ref|NR_002212|gb|BC012069	0.00054	up	16.7939
A_23_P126908	NM_003820	TNFRSF14	tumor necrosis factor receptor superfamily, member 14 (herpesvirus entry mediator)	ref|NM_003820|gb|AK124010|ens|ENST00000355716|gb|AF153978	0.00283	down	16.7901
A_24_P227121	THC2685096	NA	NA	thc|THC2685096|thc|THC2617081|thc|THC2757775|gb|BE699191	0.00188	up	16.787
A_23_P141302	NM_144680	ZNF18	zinc finger protein 18	ref|NM_144680|gb|AY491053|gb|AK057783|ens|ENST00000322748	0.00018	down	16.7832
A_24_P522399	A_24_P522399	NA	NA		0.00063	down	16.7777
A_23_P54781	BC051317	RBBP6	retinoblastoma binding protein 6	gb|BC051317|gb|AF063596|thc|THC2478571	0.00408	down	16.7674
A_23_P130648	NM_005716	GIPC1	GIPC PDZ domain containing family, member 1	ref|NM_005716|ref|NM_202468|ref|NM_202470|ref|NM_202467	0.00376	down	16.7647
A_24_P276531	NM_024700	SNIP1	Smad nuclear interacting protein 1	ref|NM_024700|ens|ENST00000296215|gb|AK022615|gb|AK027622	0.0048	down	16.7647
A_23_P317620	NM_005737	ARL4C	ADP-ribosylation factor-like 4C	ref|NM_005737|gb|Y17804|gb|AB016811|gb|BC089043	0.00018	down	16.7593
A_23_P417200	NM_005652	TERF2	telomeric repeat binding factor 2	ref|NM_005652|ens|ENST00000254942|gb|AF002999|thc|THC2672053	0.00068	down	16.7582
A_23_P314070	NM_004308	ARHGAP1	Rho GTPase activating protein 1	ref|NM_004308|ens|ENST00000311956|gb|U02570|gb|BX640781	0.00501	down	16.7568
A_24_P127812	NM_005933	MLL	myeloid/lymphoid or mixed-lineage leukemia (trithorax homolog, Drosophila)	ref|NM_005933|ens|ENST00000389506|ens|ENST00000389507|ens|ENST00000354520	0.00009	down	16.7382
A_23_P41976	NM_145265	CCDC127	coiled-coil domain containing 127	ref|NM_145265|ens|ENST00000296824|gb|AK098567|gb|BC015349	0.0001	down	16.7382
A_23_P71752	NM_006007	ZFAND5	zinc finger, AN1-type domain 5	ref|NM_006007|ens|ENST00000376960|ens|ENST00000376962|ens|ENST00000237937	0.00043	up	16.7291
A_24_P911928	NM_001080416	NA	NA	ref|NM_001080416|ens|ENST00000331406|gb|BC032233|gb|X13294	0.00316	down	16.721
A_23_P406986	NM_152581	MOSPD2	motile sperm domain containing 2	ref|NM_152581|gb|BC030641|ens|ENST00000380492|gb|AL834345	0.00043	up	16.7196
A_32_P122226	NM_152435	AMDHD1	amidohydrolase domain containing 1	ref|NM_152435|ens|ENST00000266736|gb|AK054617|gb|AK122802	0.00366	up	16.7131
A_23_P90062	NM_006145	DNAJB1	DnaJ (Hsp40) homolog, subfamily B, member 1	ref|NM_006145|ens|ENST00000254322|gb|D49547|gb|AK092989	0.00047	down	16.7012
A_23_P31109	NM_138785	C6orf72	chromosome 6 open reading frame 72	ref|NM_138785|ens|ENST00000367419|gb|AY358952|gb|BC014320	0.00392	up	16.6998
A_24_P106910	ENST00000375284	NA	NA	ens|ENST00000375284|ens|ENST00000375290|gb|AK124593|gb|AB209495	0.00416	down	16.6908
A_24_P232696	NM_139071	SMARCD1	SWI/SNF related, matrix associated, actin dependent regulator of chromatin, subfamily d, member 1	ref|NM_139071|ref|NM_003076|gb|BC009368|ens|ENST00000228253	<0.00001	down	16.6667
A_24_P330366	NM_015156	RCOR1	REST corepressor 1	ref|NM_015156|gb|D31888|gb|AF070627|thc|THC2633239	0.001	up	16.6667
A_24_P404840	NM_000166	GJB1	gap junction protein, beta 1, 32kDa	ref|NM_000166|ens|ENST00000361726|ens|ENST00000374029|ens|ENST00000374022	0.00355	up	16.6667
A_24_P41250	A_24_P41250	NA	NA		0.00728	up	16.6667
A_24_P350589	NM_020724	RNF150	ring finger protein 150	ref|NM_020724|gb|AK130520|ens|ENST00000306799|ens|ENST00000379512	0.004	down	16.6618
A_24_P937620	BM983519	NA	NA	gb|BM983519	0.00257	down	16.6601
A_32_P11359	AK127626	NA	NA	gb|AK127626|gb|EB385328|gb|BX451967|thc|THC2562198	0.00391	down	16.6518
A_24_P646279	THC2768929	NA	NA	thc|THC2768929|gb|AW998865	0.00804	down	16.6446
A_23_P305761	NM_020889	PHF12	PHD finger protein 12	ref|NM_020889|ens|ENST00000268756|gb|AY030283|thc|THC2482036	0.00491	down	16.6358
A_24_P283320	NM_005389	PCMT1	protein-L-isoaspartate (D-aspartate) O-methyltransferase	ref|NM_005389|gb|BC007501|ens|ENST00000367378|ens|ENST00000367380	0.0011	up	16.6287
A_23_P122579	NM_001350	DAXX	death-domain associated protein	ref|NM_001350|ens|ENST00000266000|ens|ENST00000374542|ens|ENST00000383194	0.00004	down	16.6163
A_24_P70117	NM_020234	DTWD1	DTW domain containing 1	ref|NM_020234|gb|BC018028|gb|BC093073|ens|ENST00000251250	0.00217	up	16.6154
A_24_P357916	AK023228	ADAMTS20	ADAM metallopeptidase with thrombospondin type 1 motif, 20	gb|AK023228|thc|THC2486526	0.00595	up	16.6116
A_32_P61729	NM_201430	RTN3	reticulon 3	ref|NM_201430|ref|NM_006054|ref|NM_201428|ref|NM_201429	0.00188	up	16.5919
A_32_P54987	BE881987	NA	NA	gb|BE881987|thc|THC2637501	0.0022	down	16.5842
A_32_P51988	EF178107	NA	NA	gb|EF178107|gb|DQ523869|gb|X81724|gb|DQ535410	0.00848	up	16.5824
A_24_P144487	A_24_P144487	NA	NA		0.00326	up	16.5789
A_32_P138557	AK055742	LOC100131998	hypothetical protein LOC100131998	gb|AK055742|gb|BC050479|gb|BC062372|thc|THC2494466	0.0072	down	16.5787
A_23_P164341	NM_014232	VAMP2	vesicle-associated membrane protein 2 (synaptobrevin 2)	ref|NM_014232|gb|AL050223|ens|ENST00000316509|gb|CA427751	0.00054	down	16.5756
A_24_P648176	NM_001001660	LYRM5	LYR motif containing 5	ref|NM_001001660|gb|AK057730|gb|AK095164|gb|BC100276	<0.00001	up	16.5685
A_23_P152949	NM_033413	LRRC46	leucine rich repeat containing 46	ref|NM_033413|ens|ENST00000269025|gb|AK027206|gb|BC010412	0.008	down	16.5669
A_32_P41551	AK097526	LOC285957	hypothetical protein LOC285957	gb|AK097526|thc|THC2604339	0.00397	down	16.553
A_23_P252603	AF174606	FBXW4P1	F-box and WD repeat domain containing 4 pseudogene 1	gb|AF174606	0.00246	down	16.5468
A_32_P36101	NM_001177	ARL1	ADP-ribosylation factor-like 1	ref|NM_001177|ens|ENST00000261636|gb|AF493887|gb|BT007260	0.00371	up	16.5431
A_23_P341860	BC073815	NPB	neuropeptide B	gb|BC073815|thc|THC2492265|gb|W25219	0.00012	down	16.537
A_24_P227927	NM_181078	IL21R	interleukin 21 receptor	ref|NM_181078|ref|NM_181079|ref|NM_021798|ens|ENST00000337929	0.00797	down	16.5263
A_24_P921823	ENST00000369397	NA	NA	ens|ENST00000369397|thc|THC2499809	<0.00001	up	16.5165
A_32_P233049	THC2600687	NA	NA	thc|THC2600687|gb|AI478505|gb|AI057310|gb|AI935769	0.00021	down	16.5082
A_24_P304423	NM_000618	IGF1	insulin-like growth factor 1 (somatomedin C)	ref|NM_000618|gb|M29644|gb|M11568|ens|ENST00000337514	0.00517	up	16.5042
A_23_P205910	NM_004727	SLC24A1	solute carrier family 24 (sodium/potassium/calcium exchanger), member 1	ref|NM_004727|gb|AF062922|gb|BC029407|gb|BC012630	0.00282	down	16.5026
A_32_P114215	NM_203495	COMMD6	COMM domain containing 6	ref|NM_203495|ref|NM_203497|ens|ENST00000355801|ens|ENST00000377619	0.00717	up	16.5002
A_24_P215240	NM_145010	C10orf63	chromosome 10 open reading frame 63	ref|NM_145010|ens|ENST00000376370|ens|ENST00000331161|ens|ENST00000376363	0.00833	down	16.4961
A_23_P126844	NM_148965	TNFRSF25	tumor necrosis factor receptor superfamily, member 25	ref|NM_148965|ref|NM_003790|ref|NM_148966|ref|NM_148967	0.00844	down	16.4904
A_23_P204252	NM_002355	M6PR	mannose-6-phosphate receptor (cation dependent)	ref|NM_002355|ens|ENST00000000412|gb|M16985|gb|BC024206	0.00185	down	16.4875
A_23_P36700	NM_018009	TAPBPL	TAP binding protein-like	ref|NM_018009|ens|ENST00000266556|gb|AK222956|gb|AK001005	0.00096	down	16.4865
A_24_P683861	ENST00000390594	NA	NA	ens|ENST00000390594|ens|ENST00000390599|ens|ENST00000283694|ens|ENST00000302092	0.00303	up	16.4839
A_32_P486443	AB011129	ZNF500	zinc finger protein 500	gb|AB011129	0.00067	down	16.4823
A_23_P26810	NM_000546	TP53	tumor protein p53	ref|NM_000546|gb|BC003596|gb|DQ186648|gb|DQ186649	0.0041	down	16.4791
A_24_P315014	XR_015427	RP11-167P23.2	XAGE-4 protein	ref|XR_015427|ref|XR_015447	0.00614	down	16.4638
A_24_P244495	ENST00000257897	NA	NA	ens|ENST00000257897|gb|D79989|thc|THC2722518	0.00093	down	16.4602
A_24_P359267	NM_001626	NA	NA	ref|NM_001626|ens|ENST00000358335|gb|AK054771|gb|AK055779	0.00154	down	16.4596
A_24_P237270	NM_000675	ADORA2A	adenosine A2a receptor	ref|NM_000675|gb|M97370|ens|ENST00000358654|ens|ENST00000337539	0.00013	down	16.4577
A_23_P26124	NM_134260	RORA	RAR-related orphan receptor A	ref|NM_134260|ref|NM_002943|ref|NM_134261|ref|NM_134262	0.001	down	16.4568
A_23_P146172	AF116665	NA	NA	gb|AF116665|thc|THC2487283	0.00786	down	16.4498
A_23_P65659	NM_024490	ATP10A	ATPase, class V, type 10A	ref|NM_024490|ens|ENST00000389966|ens|ENST00000389967|ens|ENST00000356865	0.00267	down	16.4331
A_23_P205724	NM_199043	C14orf102	chromosome 14 open reading frame 102	ref|NM_199043|ref|NM_017970|ens|ENST00000340745|ens|ENST00000354366	0.00041	down	16.4319
A_24_P649050	AK023816	NA	NA	gb|AK023816|thc|THC2497652	0.0003	down	16.4313
A_32_P198810	ENST00000381800	NA	NA	ens|ENST00000381800|gb|AY037867|thc|THC2544977	0.00146	up	16.4034
A_32_P212141	A_32_P212141	NA	NA		0.00649	up	16.4011
A_23_P113161	NM_030806	C1orf21	chromosome 1 open reading frame 21	ref|NM_030806|ens|ENST00000235307|ens|ENST00000367514|gb|AF312864	0.00221	down	16.3996
A_23_P114656	NM_004964	HDAC1	histone deacetylase 1	ref|NM_004964|ens|ENST00000373548|ens|ENST00000373541|gb|D50405	0.0015	down	16.3978
A_24_P268160	NM_178454	TMEM77	transmembrane protein 77	ref|NM_178454|gb|BC091509|ens|ENST00000369761|ens|ENST00000286692	0.00001	up	16.3776
A_23_P73589	NM_002444	MSN	moesin	ref|NM_002444|ens|ENST00000360270|gb|M69066|gb|BC017293	0.00189	down	16.3683
A_24_P148235	NM_001030	RPS27	ribosomal protein S27	ref|NM_001030|ens|ENST00000368567|ens|ENST00000368565|ens|ENST00000252325	0.00062	up	16.3618
A_23_P256432	NM_006243	PPP2R5A	protein phosphatase 2, regulatory subunit B', alpha isoform	ref|NM_006243|ens|ENST00000261461|gb|L42373|gb|BC022474	0.00781	up	16.3418
A_32_P50087	BF195408	CPVL	carboxypeptidase, vitellogenic-like	gb|BF195408|gb|BE857171|gb|CA308555|gb|BQ575452	0.00114	up	16.3412
A_32_P26103	NM_006412	AGPAT2	1-acylglycerol-3-phosphate O-acyltransferase 2 (lysophosphatidic acid acyltransferase, beta)	ref|NM_006412|ens|ENST00000371696|ens|ENST00000359841|gb|DQ892146	0.0075	up	16.3347
A_23_P133107	ENST00000264899	NA	NA	ens|ENST00000264899|gb|AK027833|gb|BC009254|gb|BC020192	0.00349	down	16.3279
A_24_P244162	NM_018425	PI4K2A	phosphatidylinositol 4-kinase type 2 alpha	ref|NM_018425|ens|ENST00000370631|gb|AK024317|gb|AL353952	0.00368	down	16.3265
A_23_P65930	NM_001077268	ZFYVE19	zinc finger, FYVE domain containing 19	ref|NM_001077268|gb|BC015738|ens|ENST00000336455|ens|ENST00000355341	0.00399	down	16.3265
A_23_P99163	NM_018370	DRAM	damage-regulated autophagy modulator	ref|NM_018370|ens|ENST00000258534|gb|AK002121|gb|AK094923	0.00611	up	16.3265
A_24_P488083	AJ519285	IGHG1	immunoglobulin heavy constant gamma 1 (G1m marker)	gb|AJ519285|gb|AJ519303|gb|AJ519288|gb|AY466504	0.00812	up	16.3242
A_24_P282251	NM_021871	FGA	fibrinogen alpha chain	ref|NM_021871|gb|BC020764|gb|BC070246|ens|ENST00000358641	0.0078	up	16.3224
A_23_P347059	NM_173468	MOBKL1A	MOB1, Mps One Binder kinase activator-like 1A (yeast)	ref|NM_173468|ens|ENST00000309395|gb|AL162039|gb|BC044913	0.00347	down	16.3145
A_23_P73835	NM_019556	MOSPD1	motile sperm domain containing 1	ref|NM_019556|ens|ENST00000370783|ens|ENST00000370780|ens|ENST00000370779	0.00344	up	16.3014
A_23_P94636	NM_018835	RC3H2	ring finger and CCCH-type zinc finger domains 2	ref|NM_018835|gb|AK000308|gb|AK000720|gb|AK027042	0.00518	down	16.2921
A_32_P121549	BC034319	NA	NA	gb|BC034319|thc|THC2650217|thc|THC2605933|thc|THC2619853	0.00031	up	16.2891
A_23_P98085	NM_000314	PTEN	phosphatase and tensin homolog	ref|NM_000314|ens|ENST00000371953|gb|U92436|gb|BC038293	0.00216	up	16.2842
A_23_P35148	NM_005645	TAF13	TAF13 RNA polymerase II, TATA box binding protein (TBP)-associated factor, 18kDa	ref|NM_005645|ens|ENST00000338366|ens|ENST00000369958|gb|X84003	0.00105	up	16.2651
A_32_P118942	THC2520542	NA	NA	thc|THC2520542	0.00144	up	16.263
A_23_P112429	NM_007209	RPL35	ribosomal protein L35	ref|NM_007209|ens|ENST00000348462|ens|ENST00000373570|ens|ENST00000313836	0.00597	up	16.263
A_23_P146922	NM_000820	GAS6	growth arrest-specific 6	ref|NM_000820|gb|AK126533|ens|ENST00000327773|ens|ENST00000357389	0.00119	up	16.2615
A_23_P139509	NM_016570	ERGIC2	ERGIC and golgi 2	ref|NM_016570|gb|BC064522|gb|AK222799|gb|AF302767	0.00659	up	16.2586
A_23_P94216	NM_152271	LONRF1	LON peptidase N-terminal domain and ring finger 1	ref|NM_152271|gb|BC106042|ens|ENST00000284538|gb|BC004538	0.0042	up	16.2544
A_24_P349648	XR_015339	NA	NA	gb|XR_015339|ref|XR_016539	0.00706	down	16.2484
A_24_P118391	XR_018475	NA	NA	gb|XR_018475|ref|XR_016561	<0.00001	down	16.2482
A_23_P73328	AY003763	IGHG1	immunoglobulin heavy constant gamma 1 (G1m marker)	gb|AY003763|gb|AY003764|thc|NP397800|thc|NP397799	0.00188	up	16.2467
A_24_P71938	NM_005900	SMAD1	SMAD family member 1	ref|NM_005900|ref|NM_001003688|ens|ENST00000302085|thc|THC2495338	0.00001	up	16.2445
A_24_P912587	XM_944412	NA	NA	ref|XM_944412|ref|XM_944410|ref|XM_934717|ref|XM_934718	0.0034	up	16.2441
A_23_P134637	NM_014855	KIAA0415	KIAA0415	ref|NM_014855|gb|BC037399|gb|AK092068|gb|AX747341	0.00261	down	16.2281
A_23_P152245	NM_052987	CDK10	cyclin-dependent kinase 10	ref|NM_052987|ref|NM_003674|gb|AK131531|ens|ENST00000343354	0.00336	down	16.2162
A_32_P180315	NM_020893	KIAA1529	KIAA1529	ref|NM_020893|gb|AB040962|ens|ENST00000375206|ens|ENST00000357054	0.00805	up	16.2132
A_23_P352365	NM_001040441	ZBTB8	zinc finger and BTB domain containing 8	ref|NM_001040441|gb|BC015239|ens|ENST00000316459|ens|ENST00000373515	0.00494	up	16.2114
A_24_P367432	BC070333	IGHV1-69	immunoglobulin heavy variable 1-69	gb|BC070333|ens|ENST00000390633|gb|AF174042|gb|AJ132852	0.00205	up	16.1959
A_23_P17269	NM_018084	CCDC88A	coiled-coil domain containing 88A	ref|NM_018084|gb|AB201172|ens|ENST00000263630|ens|ENST00000336838	0.00012	up	16.1909
A_23_P29953	NM_172174	IL15	interleukin 15	ref|NM_172174|ref|NM_000585|ens|ENST00000296545|ens|ENST00000320650	0.00177	up	16.185
A_23_P113553	NM_005366	MAGEA11	melanoma antigen family A, 11	ref|NM_005366|ref|NM_001011544|gb|BC004479|ens|ENST00000333104	0.00415	down	16.1836
A_23_P52806	NM_012104	BACE1	beta-site APP-cleaving enzyme 1	ref|NM_012104|ref|NM_138972|ref|NM_138971|ref|NM_138973	0.00252	up	16.1683
A_24_P355816	NM_018370	DRAM	damage-regulated autophagy modulator	ref|NM_018370|ens|ENST00000258534|gb|AK094923|gb|AK002121	0.00384	up	16.1535
A_23_P150057	NM_024756	MMRN2	multimerin 2	ref|NM_024756|ens|ENST00000372027|gb|AK023527|gb|BC094744	0.00589	up	16.1512
A_24_P307014	NM_005104	BRD2	bromodomain containing 2	ref|NM_005104|gb|M80613|gb|AL832722|gb|BC063840	0.00153	down	16.1479
A_24_P162073	NM_021574	BCR	breakpoint cluster region	ref|NM_021574|ref|NM_004327|ens|ENST00000305877|ens|ENST00000359540	0.00196	down	16.1404
A_32_P133916	NM_017637	BNC2	basonuclin 2	ref|NM_017637|thc|THC2700587	0.00763	down	16.126
A_23_P315364	NM_002089	CXCL2	chemokine (C-X-C motif) ligand 2	ref|NM_002089|ens|ENST00000264492|gb|M57731|gb|M36820	0.00277	up	16.1256
A_23_P97250	NM_001037533	GON4L	gon-4-like (C. elegans)	ref|NM_001037533|gb|AB046826|gb|AY335491|ens|ENST00000368331	0.0018	down	16.1232
A_32_P23989	BC036219	LOC641467	hypothetical LOC641467	gb|BC036219|thc|THC2499157	0.00817	down	16.1145
A_23_P407905	BC034350	CA6	carbonic anhydrase VI	gb|BC034350|ens|ENST00000377440|thc|THC2490642	0.00236	up	16.1142
A_23_P152570	CV575560	NA	NA	gb|CV575560|thc|THC2671898	0.00085	down	16.1138
A_23_P112950	NM_018179	ATF7IP	activating transcription factor 7 interacting protein	ref|NM_018179|gb|BC053625|gb|BX648096|ens|ENST00000261168	0.00596	down	16.1094
A_24_P286114	NM_004172	SLC1A3	solute carrier family 1 (glial high affinity glutamate transporter), member 3	ref|NM_004172|ens|ENST00000265113|ens|ENST00000381914|ens|ENST00000381918	0.0029	up	16.1032
A_32_P875465	THC2553543	NA	NA	thc|THC2553543	0.00458	down	16.0967
A_23_P138514	NM_012071	COMMD3	COMM domain containing 3	ref|NM_012071|ens|ENST00000376836|ens|ENST00000376787|ens|ENST00000376786	0.00657	up	16.0729
A_23_P104295	NM_022039	FBXW4	F-box and WD repeat domain containing 4	ref|NM_022039|ens|ENST00000389046|ens|ENST00000389047|ens|ENST00000331272	0.00012	down	16.0714
A_23_P354270	NM_007353	GNA12	guanine nucleotide binding protein (G protein) alpha 12	ref|NM_007353|gb|AK128701|ens|ENST00000275364|gb|AF493901	0.00496	down	16.0656
A_23_P139509	NM_016570	ERGIC2	ERGIC and golgi 2	ref|NM_016570|gb|BC064522|gb|AK222799|gb|AF302767	0.00525	up	16.0656
A_23_P415558	NM_012256	ZNF212	zinc finger protein 212	ref|NM_012256|ens|ENST00000335870|gb|U38864|gb|AK074821	0.00032	down	16.0606
A_23_P425579	NM_001008779	SPDYA	speedy homolog A (Xenopus laevis)	ref|NM_001008779|ens|ENST00000296122|gb|AY820303|gb|AK093247	0.00478	down	16.0494
A_24_P170439	ENST00000332842	NA	NA	ens|ENST00000332842|gb|AF534825|gb|XM_929970|ref|XM_941488	0.00432	down	16.0412
A_23_P213706	NM_000589	IL4	interleukin 4	ref|NM_000589|ref|NM_172348|ens|ENST00000378790|ens|ENST00000231449	0.00836	up	16.0251
A_23_P145644	NM_000790	DDC	dopa decarboxylase (aromatic L-amino acid decarboxylase)	ref|NM_000790|ref|NM_001082971|ens|ENST00000357936|ens|ENST00000340197	0.00605	up	16.0182
A_23_P62605	NM_000975	RPL11	ribosomal protein L11	ref|NM_000975|gb|BC018970|ens|ENST00000374550|gb|DQ896712	0.00794	up	16.0107
A_23_P20275	NM_024613	PLEKHF2	pleckstrin homology domain containing, family F (with FYVE domain) member 2	ref|NM_024613|ens|ENST00000315367|gb|AK023249|gb|AL834473	0.00455	down	16.0063
A_24_P700170	A_24_P700170	NA	NA		<0.00001	down	16
A_23_P203364	NM_024092	TMEM109	transmembrane protein 109	ref|NM_024092|ens|ENST00000227525|gb|AX775849|gb|AX775851	0.00138	down	16
A_24_P152144	XR_017173	NA	NA	gb|XR_017173|ref|XM_001130285	0.0006	down	15.9935
A_32_P10067	BM984383	NA	NA	gb|BM984383|gb|AW813731|thc|THC2530550|gb|BX119173	0.00521	down	15.9926
A_23_P98304	NM_018043	ANO1	anoctamin 1, calcium activated chloride channel	ref|NM_018043|gb|BC027590|gb|AY728143|ens|ENST00000355303	0.0006	up	15.9915
A_23_P21804	A_23_P21804	NA	NA		0.00745	down	15.9851
A_24_P298805	ENST00000360102	NA	NA	ens|ENST00000360102	0.00583	up	15.9698
A_23_P29495	NM_001904	CTNNB1	catenin (cadherin-associated protein), beta 1, 88kDa	ref|NM_001904|ens|ENST00000349496|gb|X87838|gb|BC058926	0.0014	down	15.9681
A_23_P399156	NM_153701	IL12RB1	interleukin 12 receptor, beta 1	ref|NM_153701|ref|NM_005535|ens|ENST00000322153|ens|ENST00000221270	<0.00001	down	15.9652
A_23_P119448	NM_014931	SAPS1	SAPS domain family, member 1	ref|NM_014931|gb|BC094753|ens|ENST00000327021|gb|AB029038	0.00352	down	15.9529
A_23_P32793	AB063923	NA	NA	gb|AB063923|gb|EF178047|gb|EF178044|gb|DQ926472	0.00558	up	15.9404
A_32_P149625	A_32_P149625	NA	NA		0.00576	down	15.9251
A_23_P385267	NM_173618	INO80E	INO80 complex subunit E	ref|NM_173618|gb|AK074137|ens|ENST00000304516|ens|ENST00000380503	0.00516	down	15.9236
A_32_P119878	THC2638630	NA	NA	thc|THC2638630	0.00758	down	15.9166
A_23_P6688	NM_018075	ANO10	anoctamin 10	ref|NM_018075|ens|ENST00000292246|ens|ENST00000350459|gb|AK131223	0.0013	up	15.9151
A_23_P251548	NM_144582	TEX261	testis expressed 261	ref|NM_144582|ens|ENST00000272438|gb|AK056410|gb|AK074840	0.00002	down	15.8996
A_24_P103434	NM_018974	UNC93A	unc-93 homolog A (C. elegans)	ref|NM_018974|gb|BC098248|ens|ENST00000230256|ens|ENST00000366830	0.00456	up	15.8991
A_24_P336584	NM_182664	RASSF5	Ras association (RalGDS/AF-6) domain family member 5	ref|NM_182664|ref|NM_182663|ref|NM_182665|gb|BC004270	0.00004	down	15.8951
A_23_P159071	NM_024515	WDR25	WD repeat domain 25	ref|NM_024515|gb|BC003641|ens|ENST00000335290|gb|AY295082	0.00069	down	15.894
A_23_P2262	NM_004264	MED21	mediator complex subunit 21	ref|NM_004264|ens|ENST00000282892|gb|U46837|gb|U52960	0.00251	up	15.8908
A_32_P135469	A_32_P135469	NA	NA		0.00486	down	15.8873
A_32_P135890	NM_001013680	NA	NA	ref|NM_001013680|gb|AK128391|thc|THC2477746	0.00013	up	15.8829
A_23_P78742	NM_001459	FLT3LG	fms-related tyrosine kinase 3 ligand	ref|NM_001459|ens|ENST00000204637|ens|ENST00000344019|gb|U04806	0.00774	down	15.8818
A_32_P180524	AK055423	FLJ34048	hypothetical transcript	gb|AK055423|gb|CR626626|thc|THC2559968|thc|THC2492626	0.00254	down	15.8358
A_32_P132563	NM_002701	POU5F1	POU class 5 homeobox 1	ref|NM_002701|ref|NM_203289|ref|NR_002304|gb|AF268617	0.00547	down	15.8205
A_24_P750327	AJ245002	LOC642131	similar to hCG1812074	gb|AJ245002|thc|NP075053	0.00468	up	15.8154
A_23_P142055	XM_172995	C19orf38	chromosome 19 open reading frame 38	gb|XM_172995|ref|XM_943649|thc|THC2514018	0.00224	up	15.8146
A_23_P8297	AK093571	SCML4	sex comb on midleg-like 4 (Drosophila)	gb|AK093571|ens|ENST00000369022|ens|ENST00000369025|gb|AX748208	0.00234	down	15.8057
A_23_P128073	NM_139067	SMARCC2	SWI/SNF related, matrix associated, actin dependent regulator of chromatin, subfamily c, member 2	ref|NM_139067|ref|NM_003075|gb|AB209293|gb|AB209006	0.00152	down	15.8046
A_23_P117546	AK129920	NA	NA	gb|AK129920|thc|THC2497784	0.00804	up	15.8038
A_23_P165668	AK025657	SLC35F5	solute carrier family 35, member F5	gb|AK025657|thc|NP1201355|thc|THC2478644	0.00003	up	15.8023
A_23_P253281	ENST00000376840	NA	NA	ens|ENST00000376840|gb|AB024057|thc|THC2463776	0.00112	up	15.8014
A_23_P205027	NM_032859	ABHD13	abhydrolase domain containing 13	ref|NM_032859|gb|BC022566|ens|ENST00000375898|gb|AK124864	0.00043	up	15.7978
A_23_P364619	NM_152418	WDR21C	WD repeat domain 21C	ref|NM_152418|gb|AK093094|gb|AX747918|gb|AK097600	0.00433	down	15.7913
A_24_P125894	NM_014634	PPM1F	protein phosphatase 1F (PP2C domain containing)	ref|NM_014634|ens|ENST00000263212|gb|D13640|gb|AK126377	0.00653	down	15.7907
A_23_P216402	NM_031432	UCK1	uridine-cytidine kinase 1	ref|NM_031432|gb|AK057848|gb|BC015547|ens|ENST00000372215	0.00264	down	15.7895
A_24_P290927	NM_014847	UBAP2L	ubiquitin associated protein 2-like	ref|NM_014847|gb|D63478|ens|ENST00000361546|ens|ENST00000368504	0.00315	down	15.7733
A_23_P37785	ENST00000304372	NA	NA	ens|ENST00000304372|gb|BC070103|gb|BC094790|thc|THC2528087	0.0062	down	15.7558
A_24_P912439	AB075848	AKNA	AT-hook transcription factor	gb|AB075848|ens|ENST00000312033|gb|AY703041|gb|AY703042	0.0076	down	15.754
A_32_P119204	AK025353	RPS10	ribosomal protein S10	gb|AK025353|gb|AB209165|gb|XR_019617|ref|XR_016556	0.00548	up	15.748
A_23_P36140	NM_012200	B3GAT3	beta-1,3-glucuronyltransferase 3 (glucuronosyltransferase I)	ref|NM_012200|ens|ENST00000377979|ens|ENST00000265471|gb|AB009598	0.00427	down	15.7434
A_23_P139509	NM_016570	ERGIC2	ERGIC and golgi 2	ref|NM_016570|gb|BC064522|gb|AK222799|gb|AF302767	0.00588	up	15.7413
A_32_P100771	BX118374	NA	NA	gb|BX118374	0.00134	down	15.7286
A_24_P702749	AF471454	NA	NA	gb|AF471454|gb|U00515|gb|AF471414|gb|DQ431553	0.0071	up	15.7175
A_24_P246591	XR_018565	NA	NA	gb|XR_018565|ref|XR_016519	0.00729	up	15.7155
A_32_P112279	NM_001039690	CHTF8	CTF8, chromosome transmission fidelity factor 8 homolog (S. cerevisiae)	ref|NM_001039690|ref|NM_001040146|ref|NM_001040144|ens|ENST00000306585	0.00001	down	15.7143
A_23_P329112	NM_000215	JAK3	Janus kinase 3 (a protein tyrosine kinase, leukocyte)	ref|NM_000215|ens|ENST00000361469|gb|U09607|thc|THC2474980	0.00609	down	15.7143
A_23_P416434	NM_015288	PHF15	PHD finger protein 15	ref|NM_015288|gb|D87076|gb|BC021169|thc|THC2616991	0.00254	down	15.7092
A_23_P388150	NM_032562	PLA2G12B	phospholipase A2, group XIIB	ref|NM_032562|gb|AF349540|ens|ENST00000373032|gb|BC093996	0.00334	down	15.6949
A_23_P59714	BC007365	MGC16142	hypothetical protein MGC16142	gb|BC007365	0.0046	down	15.6778
A_23_P317001	NM_004330	BNIP2	BCL2/adenovirus E1B 19kDa interacting protein 2	ref|NM_004330|gb|U15173|thc|NP116885	0.00165	up	15.6766
A_23_P169197	NM_032303	HSDL2	hydroxysteroid dehydrogenase like 2	ref|NM_032303|gb|BC004331|ens|ENST00000262542|ens|ENST00000338786	0.00092	up	15.6637
A_23_P139509	NM_016570	ERGIC2	ERGIC and golgi 2	ref|NM_016570|gb|BC064522|gb|AK222799|gb|AF302767	0.0069	up	15.6603
A_24_P610405	AI754733	NA	NA	gb|AI754733|gb|BE049566|gb|CA436034|gb|AW069067	0.00329	up	15.6591
A_24_P79755	NM_006066	AKR1A1	aldo-keto reductase family 1, member A1 (aldehyde reductase)	ref|NM_006066|ref|NM_153326|ens|ENST00000372070|ens|ENST00000351829	0.00564	up	15.6545
A_24_P98762	NM_002716	PPP2R1B	protein phosphatase 2 (formerly 2A), regulatory subunit A, beta isoform	ref|NM_002716|ens|ENST00000341980|gb|AF163473|thc|THC2767088	0.00533	down	15.6497
A_23_P427760	NM_152431	PIWIL4	piwi-like 4 (Drosophila)	ref|NM_152431|gb|BC031060|ens|ENST00000299001|gb|AB079366	0.00084	up	15.6473
A_24_P673786	ENST00000376573	NA	NA	ens|ENST00000376573|gb|AK023329|thc|THC2587363|thc|THC2492584	0.00464	down	15.6467
A_23_P2097	NM_018073	TRIM68	tripartite motif-containing 68	ref|NM_018073|ens|ENST00000300747|gb|AK056523|gb|AK001231	0.00255	down	15.6463
A_23_P411431	ENST00000282366	NA	NA	ens|ENST00000282366|gb|AK127245|gb|AB033092|gb|AL161954	0.00816	down	15.6463
A_23_P26810	NM_000546	TP53	tumor protein p53	ref|NM_000546|gb|BC003596|gb|DQ186648|gb|DQ186649	0.00549	down	15.625
A_23_P20722	NM_003086	SNAPC4	small nuclear RNA activating complex, polypeptide 4, 190kDa	ref|NM_003086|gb|AK023513|ens|ENST00000298532|gb|AF032387	0.00497	down	15.6085
A_23_P323227	NM_001008709	PPP1CA	protein phosphatase 1, catalytic subunit, alpha isoform	ref|NM_001008709|ref|NM_002708|ref|NM_206873|ens|ENST00000376745	0.00146	down	15.6
A_24_P144346	Y11328	NA	NA	gb|Y11328|thc|NP492523|thc|THC2599638	0.00698	up	15.5998
A_24_P28739	NM_018084	CCDC88A	coiled-coil domain containing 88A	ref|NM_018084|gb|BX648138|gb|AB201172|ens|ENST00000263630	0.00833	up	15.5995
A_23_P130598	NM_024103	SLC25A23	solute carrier family 25 (mitochondrial carrier; phosphate carrier), member 23	ref|NM_024103|gb|AJ512835|gb|BC001656|gb|AJ619962	0.00587	up	15.5979
A_24_P7470	A_24_P7470	NA	NA		0.00834	up	15.5941
A_23_P86818	NM_004813	PEX16	peroxisomal biogenesis factor 16	ref|NM_004813|ens|ENST00000378750|gb|AB016531|gb|BC004356	0.00404	down	15.5844
A_32_P234700	BC019667	NA	NA	gb|BC019667|gb|AL110181	0.00136	up	15.5779
A_23_P128174	NM_175623	RAB3IP	RAB3A interacting protein (rabin3)	ref|NM_175623|ref|NM_175625|ref|NM_022456|ref|NM_175624	0.00394	up	15.5748
A_32_P2925	DB318193	NA	NA	gb|DB318193	0.00041	up	15.5689
A_23_P119583	Z46632	PDE4C	phosphodiesterase 4C, cAMP-specific (phosphodiesterase E1 dunce homolog, Drosophila)	gb|Z46632|thc|THC2475141	0.00109	down	15.5638
A_24_P17490	NM_020872	CNTN3	contactin 3 (plasmacytoma associated)	ref|NM_020872|ens|ENST00000263665|gb|AB040929|gb|AL512746	0.00624	down	15.5527
A_24_P69274	NM_024641	MANEA	mannosidase, endo-alpha	ref|NM_024641|gb|BX640869|ens|ENST00000358812|gb|AK022900	0.00307	up	15.5517
A_23_P49900	NM_014389	PELP1	proline, glutamate and leucine rich protein 1	ref|NM_014389|gb|BC069058|ens|ENST00000301396|ens|ENST00000269230	0.00627	down	15.5502
A_23_P96568	NM_001456	FLNA	filamin A, alpha (actin binding protein 280)	ref|NM_001456|gb|AK090427|gb|AB191260|gb|AB191259	0.00044	down	15.5459
[truncated: 1,518 more rows]
